# Supplementary material for: Biscembranoids and Cembranoids from the Soft Coral Sarcophyton elegans
Source: PubMed Central journal article supplement (PMC5408232; doi:10.3390/md15040085), 2017-03-23

# Biscembranoids and cembranoids from the South China Sea Soft Coral *Sarcophyton elegans*

Wei Li, Yi-Hong Zou, Man-Xi Ge, Lan-Lan Lou, Yun-Shao Xu, Abrar Ahmed, Yun-Yun Chen, Jun-Sheng Zhang, Gui-Hua Tang, Sheng Yin\*

School of Pharmaceutical Sciences, Sun Yat-sen University, Guangzhou, Guangdong 510006, People's Republic of China

E-mail: yinsh2@mail.sysu.edu.cn; Fax: +86-20-39943090; Tel: +86-20-39943090.

## Contents:

- S1**  $^1\text{H}$  NMR spectrum of **1** in Methanol- $d_4$
- S2**  $^{13}\text{C}$  NMR spectrum of **1** in Methanol- $d_4$
- S3** HSQC spectrum of **1** in Methanol- $d_4$
- S4** HMBC spectrum of **1** in Methanol- $d_4$
- S5**  $^1\text{H}$ - $^1\text{H}$  COSY spectrum of **1** in Methanol- $d_4$
- S6** NOESY spectrum of **1** in Methanol- $d_4$
- S7** HRESIMS spectrum of **1**
- S8**  $^1\text{H}$  NMR spectrum of **2** in Methanol- $d_4$
- S9**  $^{13}\text{C}$  NMR spectrum of **2** in Methanol- $d_4$
- S10** HSQC spectrum of **2** in Methanol- $d_4$

- S11** HMBC spectrum of **2** in Methanol-*d*<sub>4</sub>
- S12** <sup>1</sup>H-<sup>1</sup>H COSY spectrum of **2** in Methanol-*d*<sub>4</sub>
- S13** NOESY spectrum of **2** in Methanol-*d*<sub>4</sub>
- S14** HRESIMS spectrum of **2**
- S15** <sup>1</sup>H NMR spectrum of **3** in Methanol-*d*<sub>4</sub>
- S16** <sup>13</sup>C NMR spectrum of **3** in Methanol-*d*<sub>4</sub>
- S17** HSQC spectrum of **3** in Methanol-*d*<sub>4</sub>
- S18** HMBC spectrum of **3** in Methanol-*d*<sub>4</sub>
- S19** <sup>1</sup>H-<sup>1</sup>H COSY spectrum of **3** in Methanol-*d*<sub>4</sub>
- S20** NOESY spectrum of **3** in Methanol-*d*<sub>4</sub>
- S21** HRESIMS spectrum of **3**
- S22** <sup>1</sup>H NMR spectrum of **4** in Methanol-*d*<sub>4</sub>
- S23** <sup>13</sup>C NMR spectrum of **4** in Methanol-*d*<sub>4</sub>
- S24** HSQC spectrum of **4** in Methanol-*d*<sub>4</sub>
- S25** HMBC spectrum of **4** in Methanol-*d*<sub>4</sub>
- S26** <sup>1</sup>H-<sup>1</sup>H COSY spectrum of **4** in Methanol-*d*<sub>4</sub>
- S27** NOESY spectrum of **4** in Methanol-*d*<sub>4</sub>
- S28** HRESIMS spectrum of **4**

- S29**  $^1\text{H}$  NMR spectrum of **5** in Methanol- $d_4$
- S30**  $^{13}\text{C}$  NMR spectrum of **5** in Methanol- $d_4$
- S31** HSQC spectrum of **5** in Methanol- $d_4$
- S32** HMBC spectrum of **5** in Methanol- $d_4$
- S33**  $^1\text{H}$ - $^1\text{H}$  COSY spectrum of **5** in Methanol- $d_4$
- S34** NOESY spectrum of **5** in Methanol- $d_4$
- S35** HRESIMS spectrum of **5**
- S36**  $^1\text{H}$  NMR spectrum of **6** in Methanol- $d_4$
- S37**  $^{13}\text{C}$  NMR spectrum of **6** in Methanol- $d_4$
- S38** HSQC spectrum of **6** in Methanol- $d_4$
- S39** HMBC spectrum of **6** in Methanol- $d_4$
- S40**  $^1\text{H}$ - $^1\text{H}$  COSY spectrum of **6** in Methanol- $d_4$
- S41** NOESY spectrum of **6** in Methanol- $d_4$
- S42** HRESIMS spectrum of **6**
- S43**  $^1\text{H}$  NMR spectrum of **7** in  $\text{CDCl}_3$
- S44**  $^{13}\text{C}$  NMR spectrum of **7** in  $\text{CDCl}_3$
- S45** HSQC spectrum of **7** in  $\text{CDCl}_3$
- S46** HMBC spectrum of **7** in  $\text{CDCl}_3$

- S47**  $^1\text{H}$ - $^1\text{H}$  COSY spectrum of **7** in  $\text{CDCl}_3$
- S48** NOESY spectrum of **7** in  $\text{CDCl}_3$
- S49** HRESIMS spectrum of **7**
- S50**  $^1\text{H}$  NMR spectrum of **8** in Methanol- $d_4$
- S51**  $^{13}\text{C}$  NMR spectrum of **8** in Methanol- $d_4$
- S52**  $^1\text{H}$  NMR spectrum of **8** in  $\text{CDCl}_3$
- S53**  $^{13}\text{C}$  NMR spectrum of **8** in  $\text{CDCl}_3$
- S54**  $^1\text{H}$  NMR spectrum of **9** in Methanol- $d_4$
- S55**  $^{13}\text{C}$  NMR spectrum of **9** in Methanol- $d_4$
- S56** Selected NOESY correlations of **2**.

S1

<sup>1</sup>H NMR spectrum of **1** in Methanol-*d*<sub>4</sub>

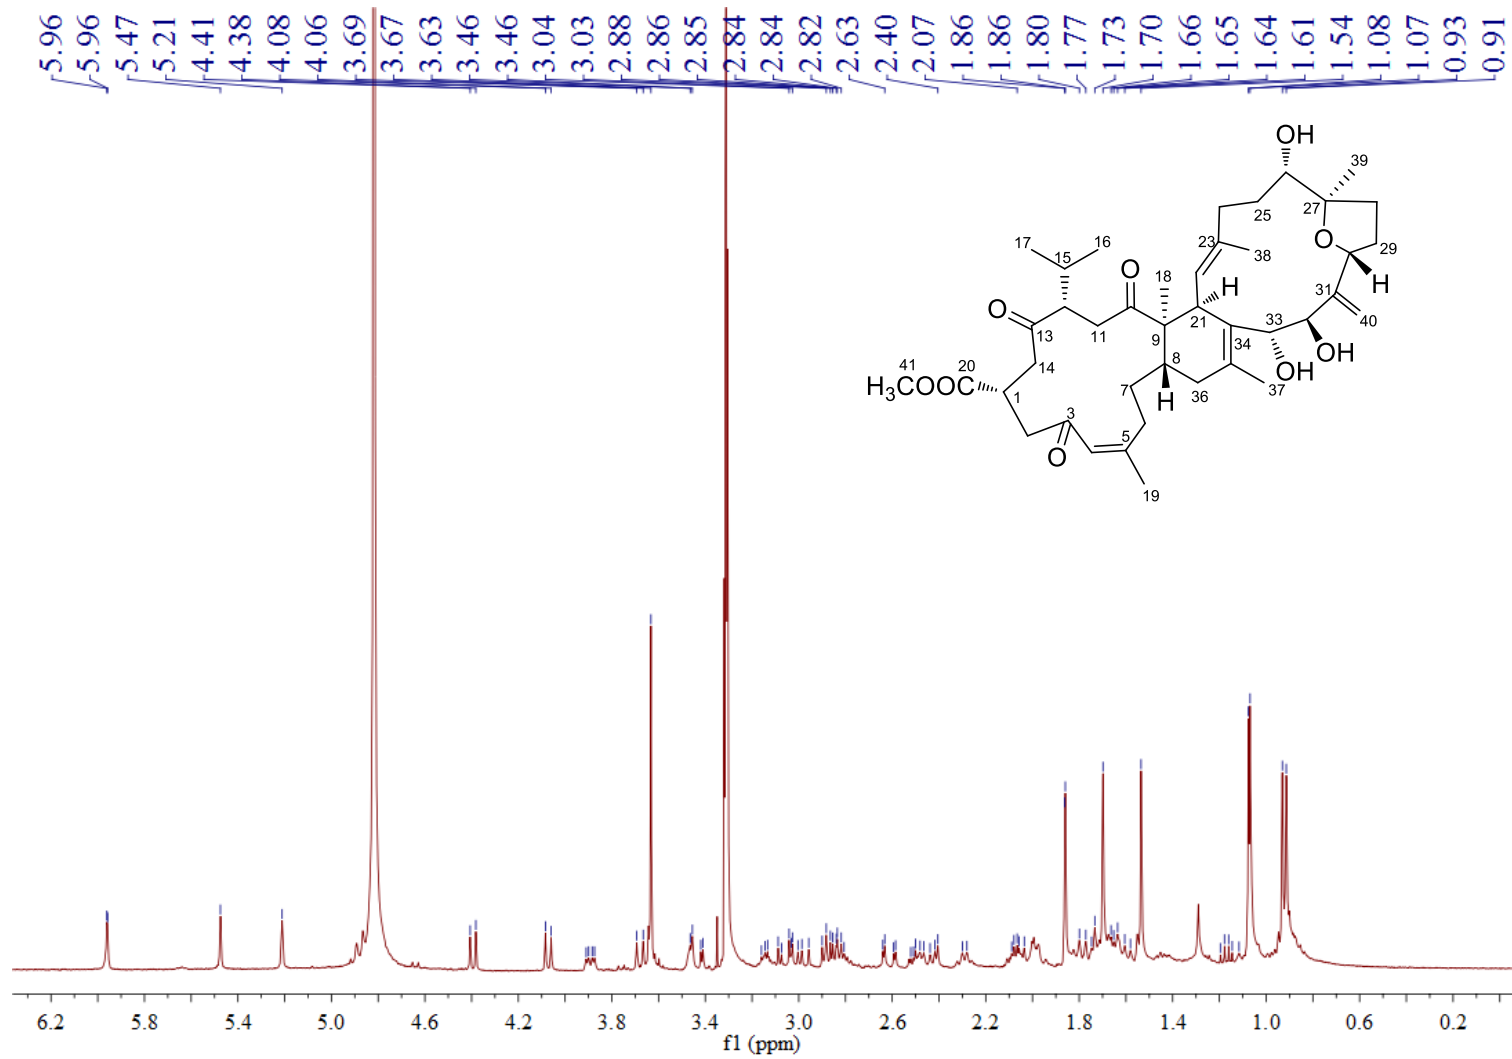

S2

$^{13}\text{C}$  NMR spectrum of **1** in Methanol- $d_4$

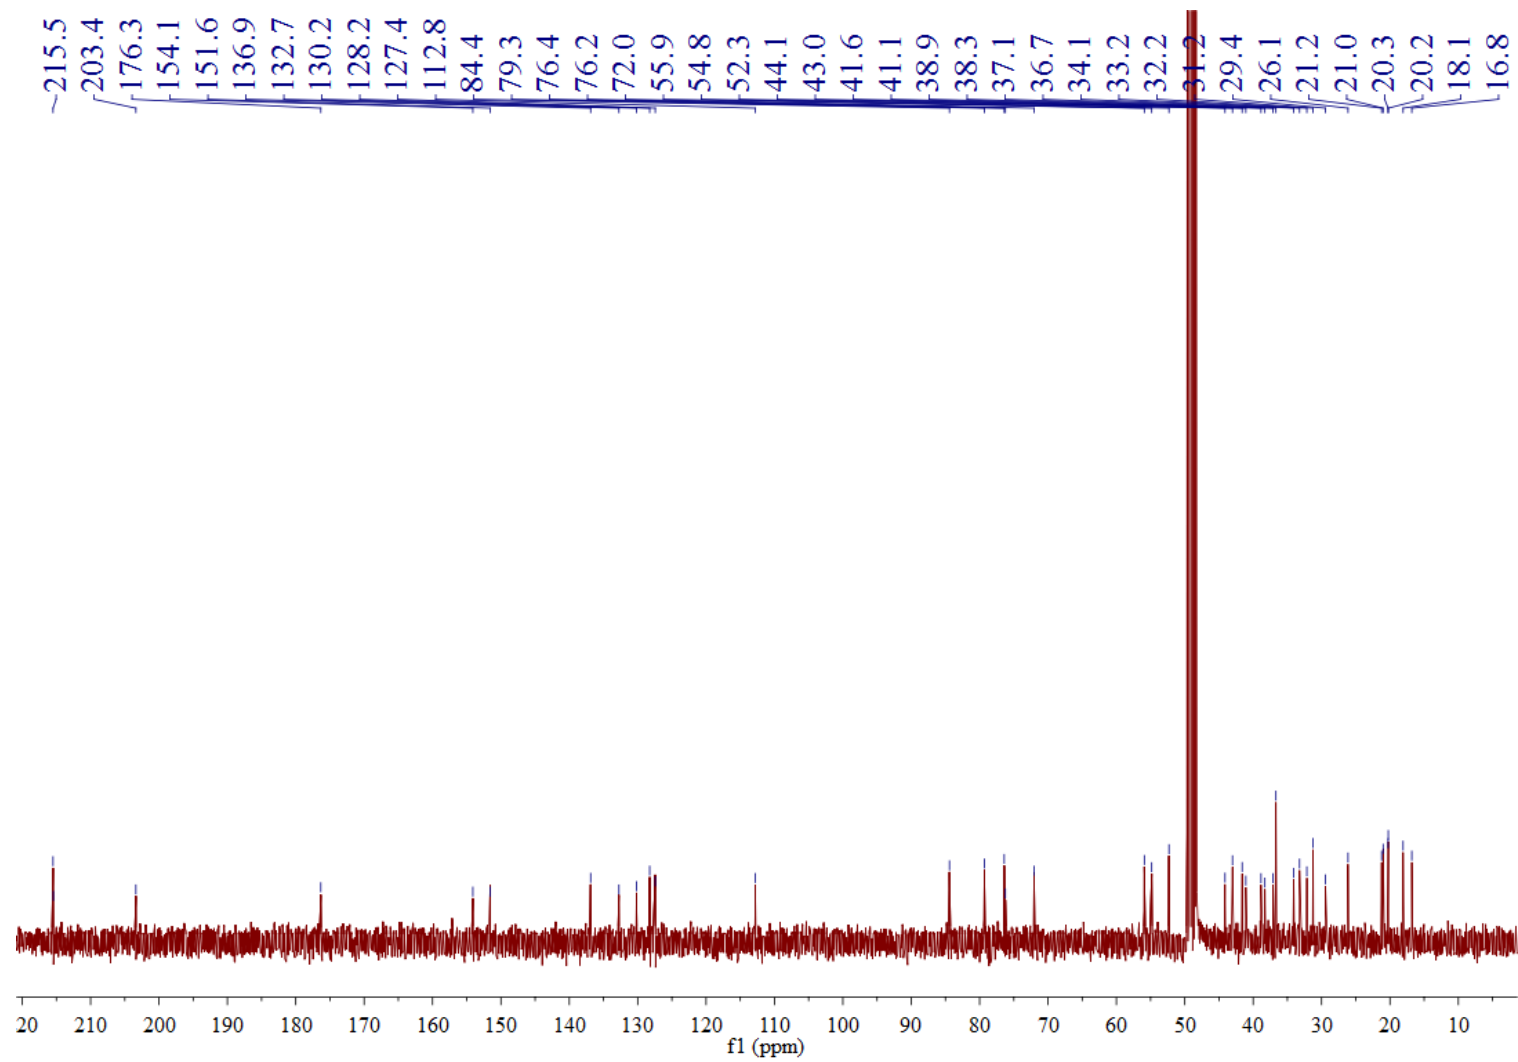

S3 HSQC spectrum of **1** in Methanol- $d_4$

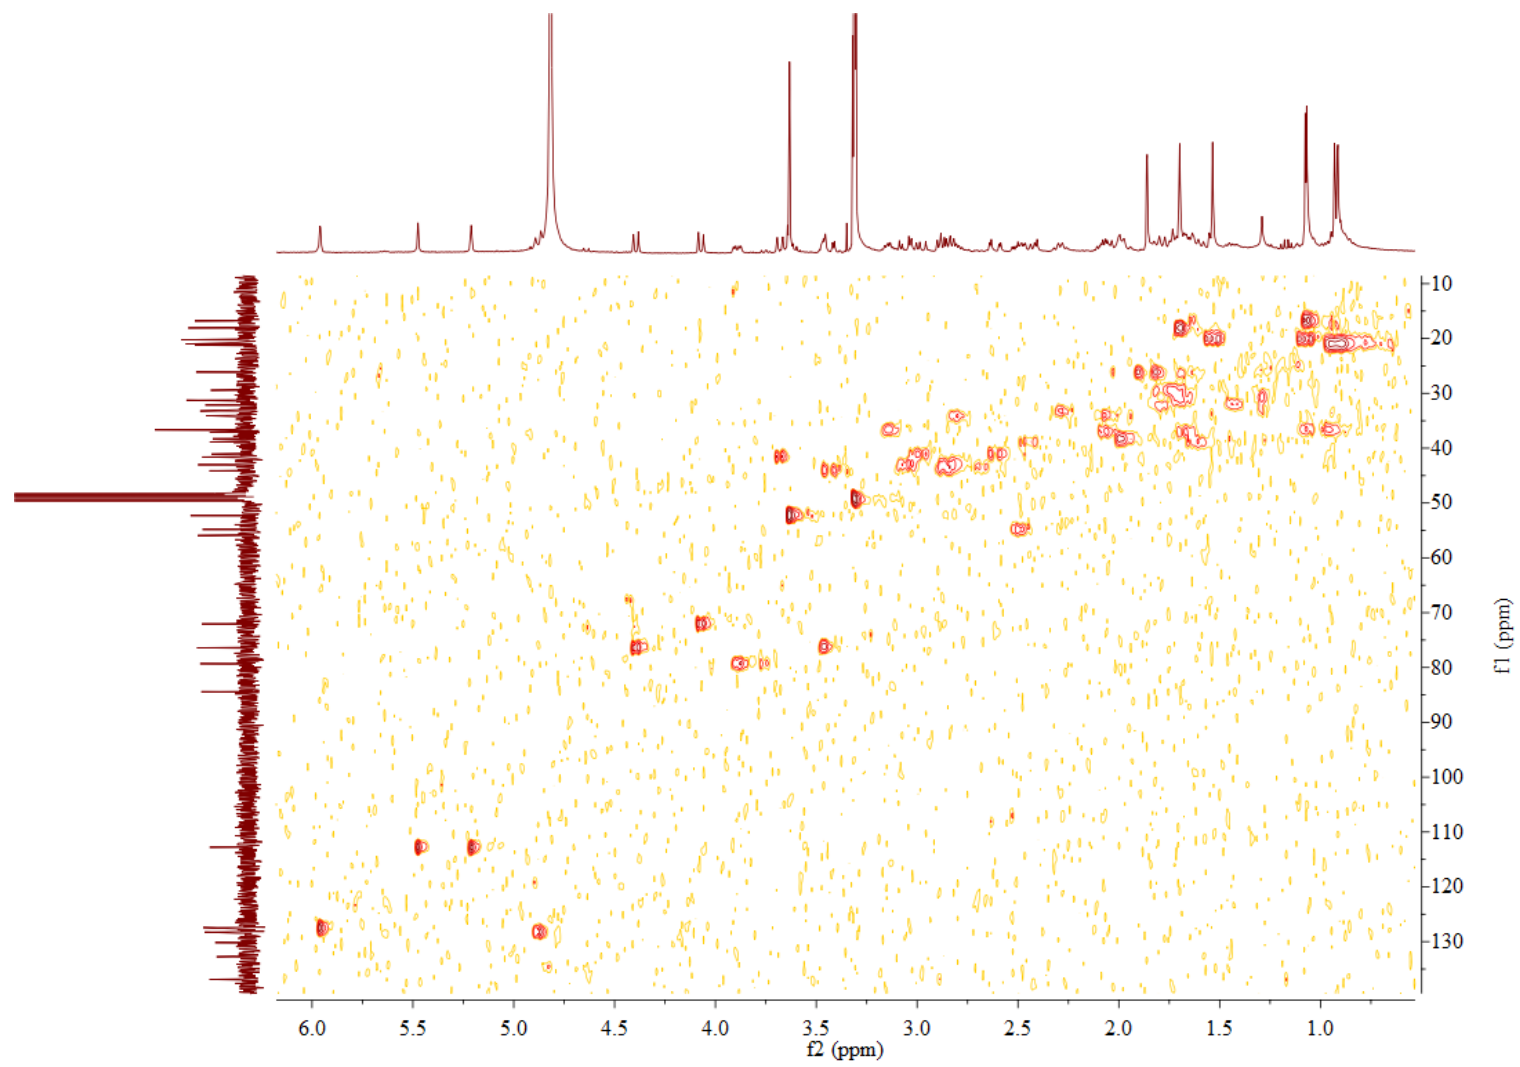

S4 HMBC spectrum of **1** in Methanol- $d_4$

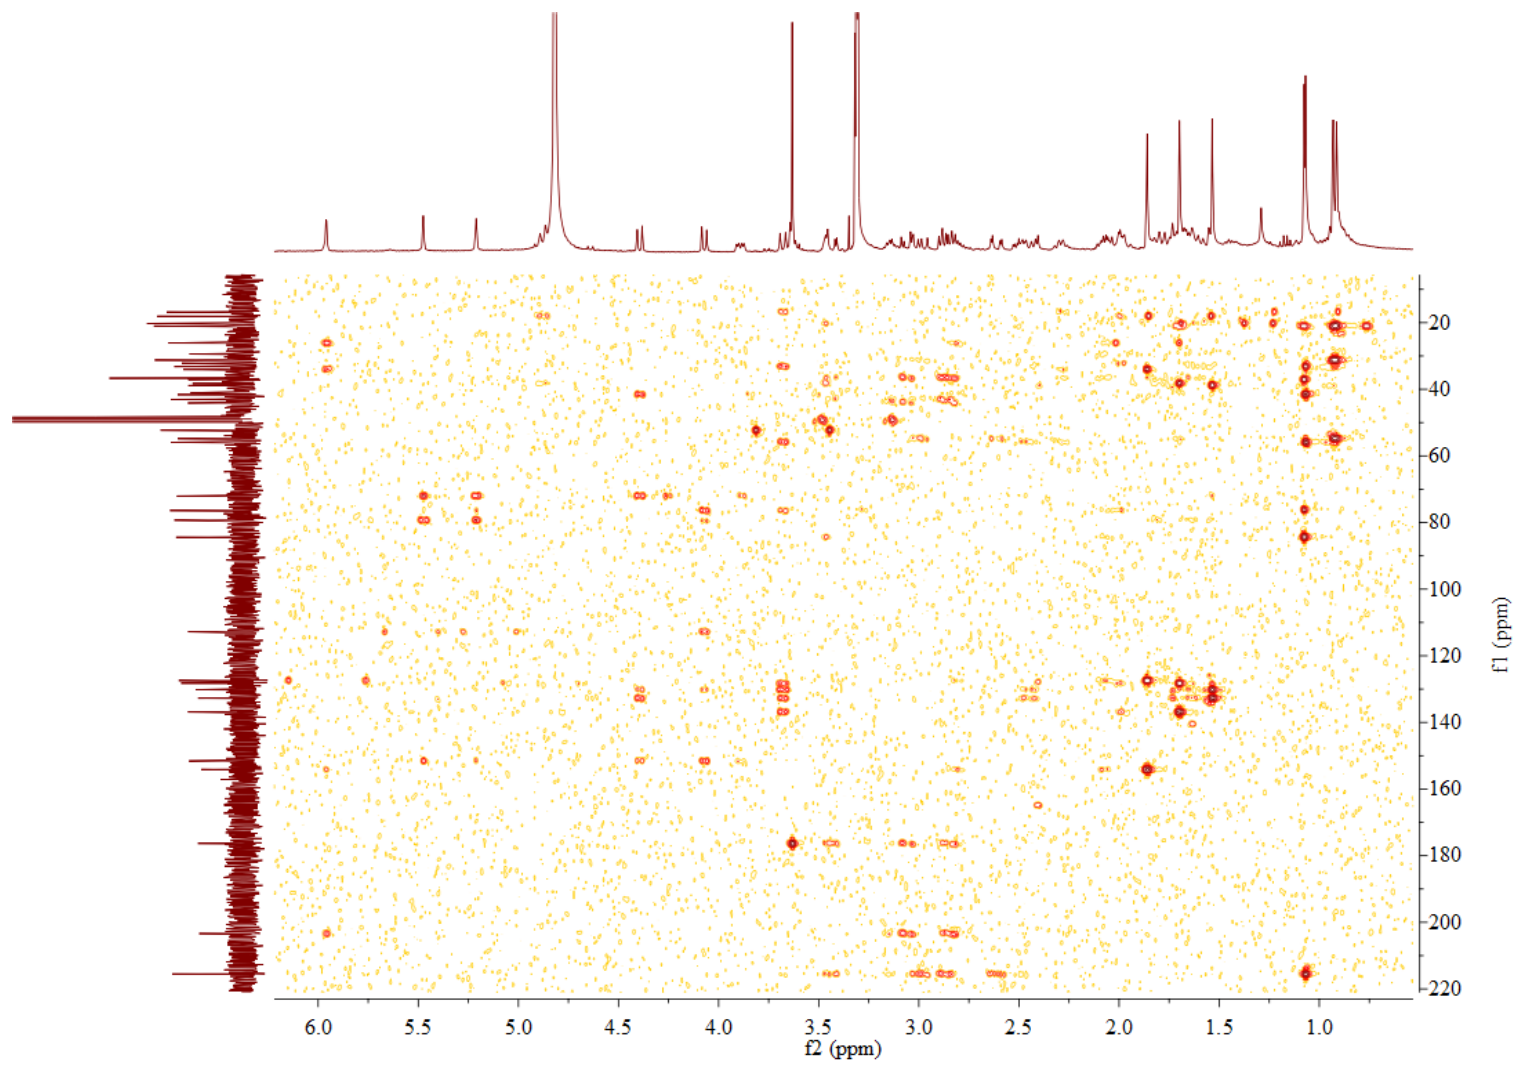



S5

$^1\text{H}$ - $^1\text{H}$  COSY spectrum of **1** in Methanol- $d_4$

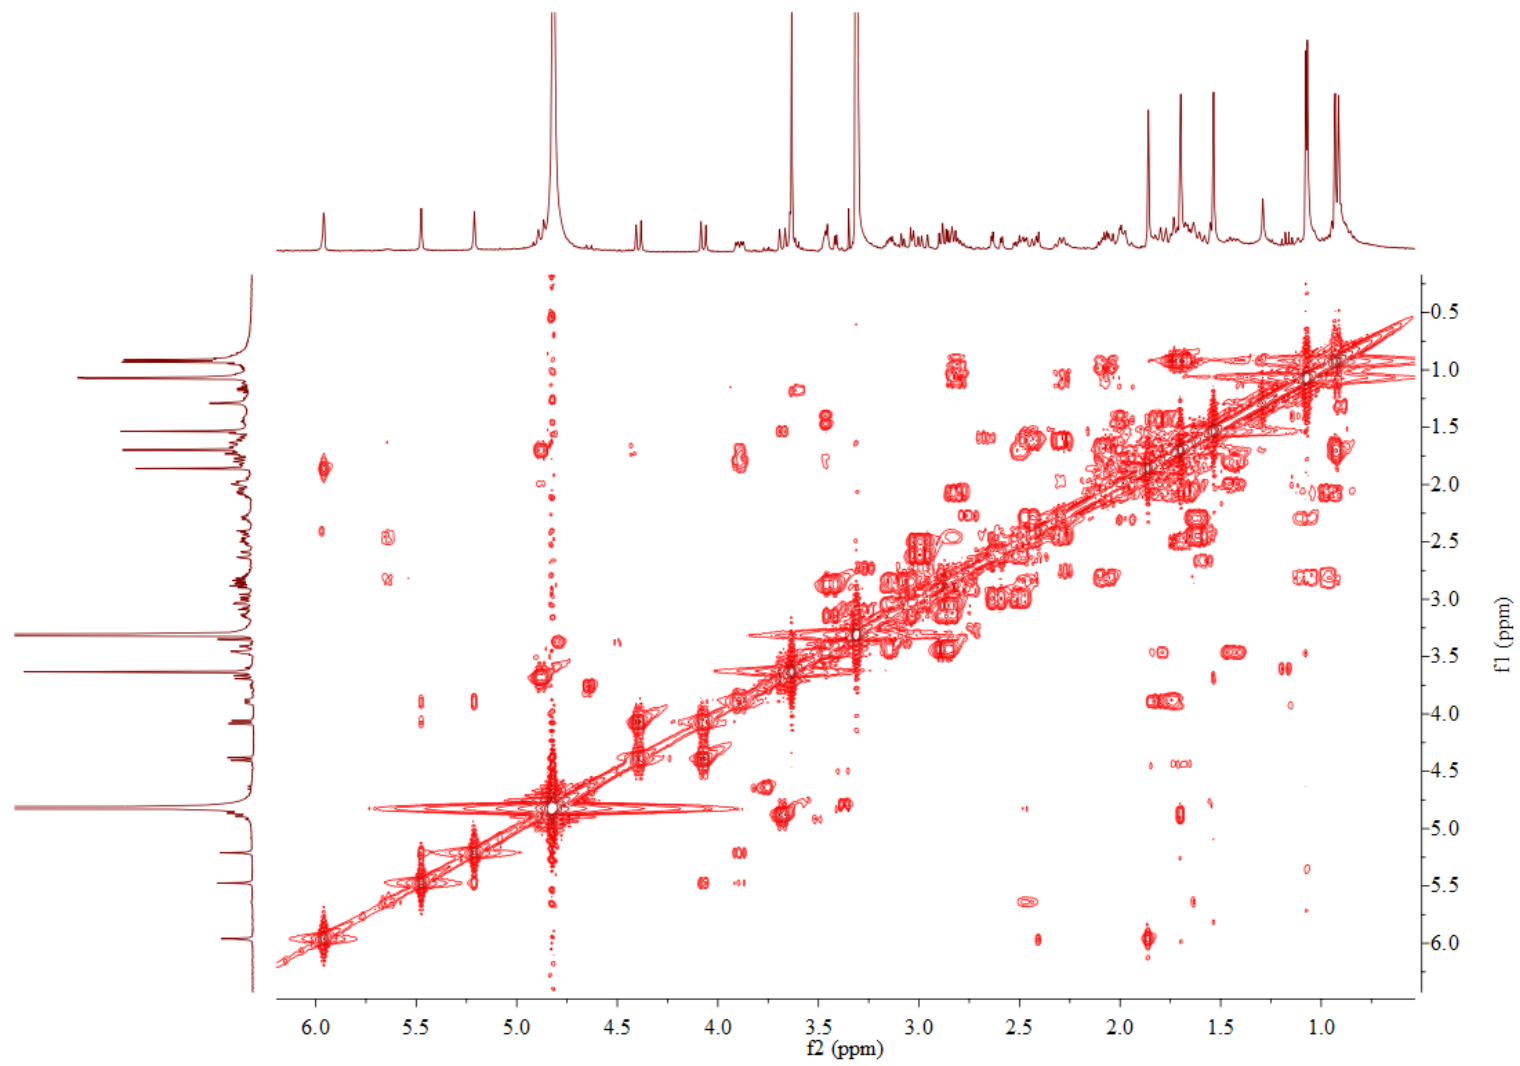

S6 NOESY spectrum of **1** in Methanol- $d_4$

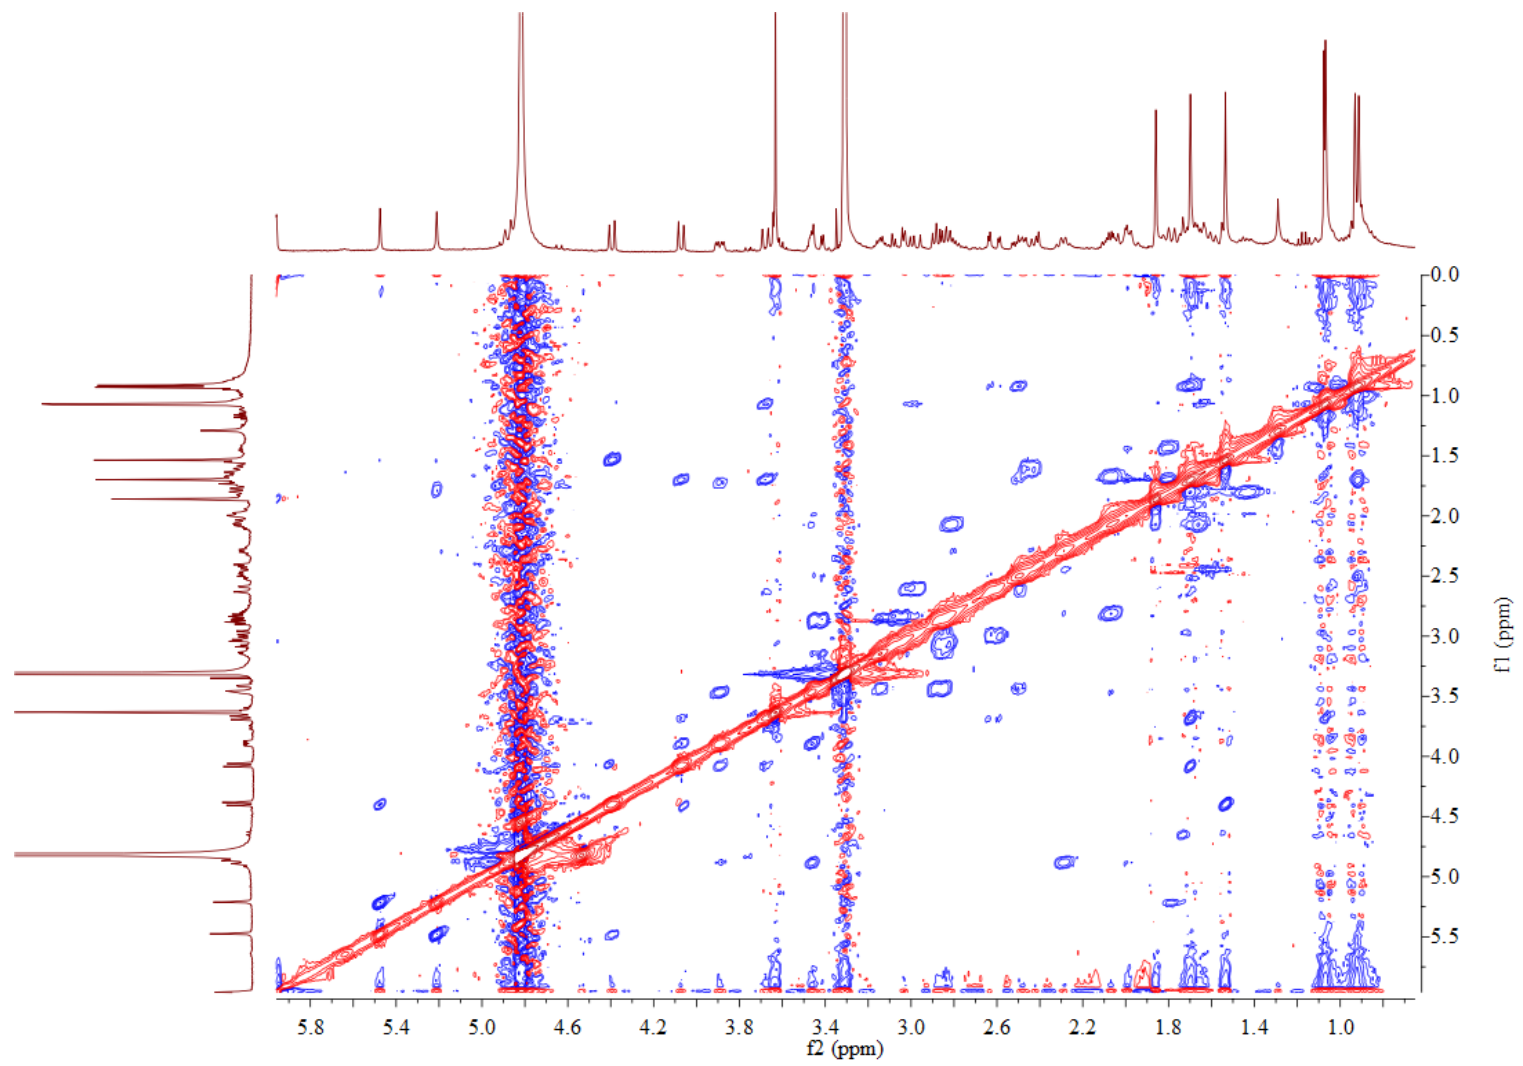

S7 HRESIMS spectrum of **1**

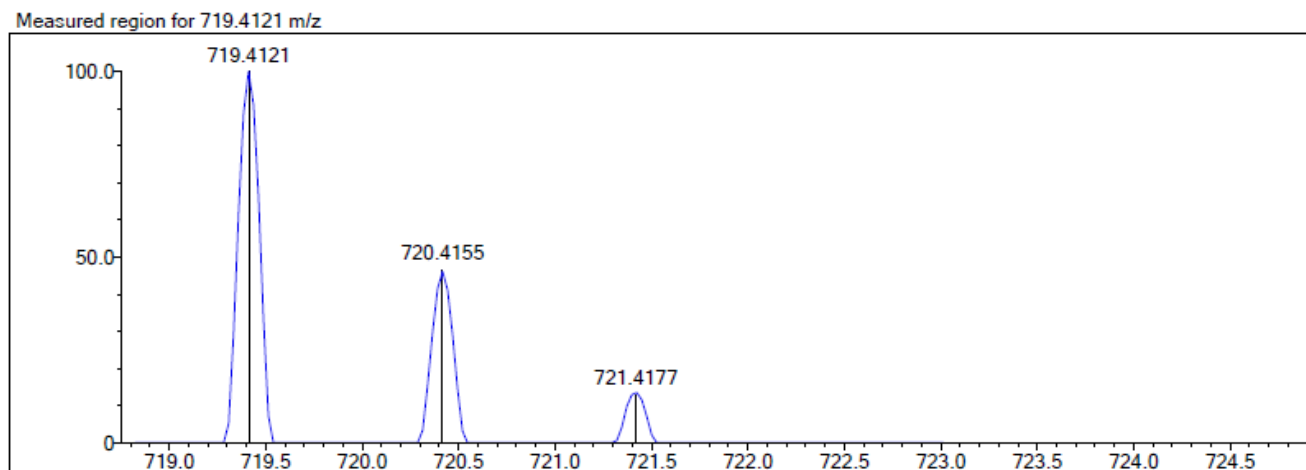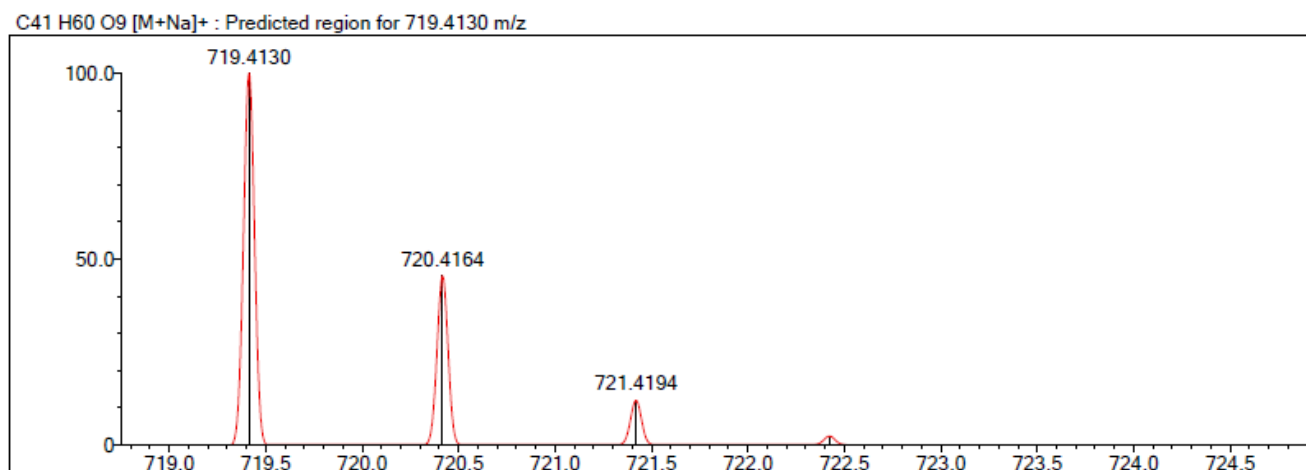

| Rank | Score | Formula (M) | Ion                 | Meas. m/z | Pred. m/z | Df. (mDa) | Df. (ppm) | Iso    | DBE  |
|------|-------|-------------|---------------------|-----------|-----------|-----------|-----------|--------|------|
| 1    | 99.38 | C41 H60 O9  | [M+Na] <sup>+</sup> | 719.4121  | 719.4130  | -0.9      | -1.25     | 100.00 | 12.0 |

S8

<sup>1</sup>H NMR spectrum of **2** in Methanol-*d*<sub>4</sub>

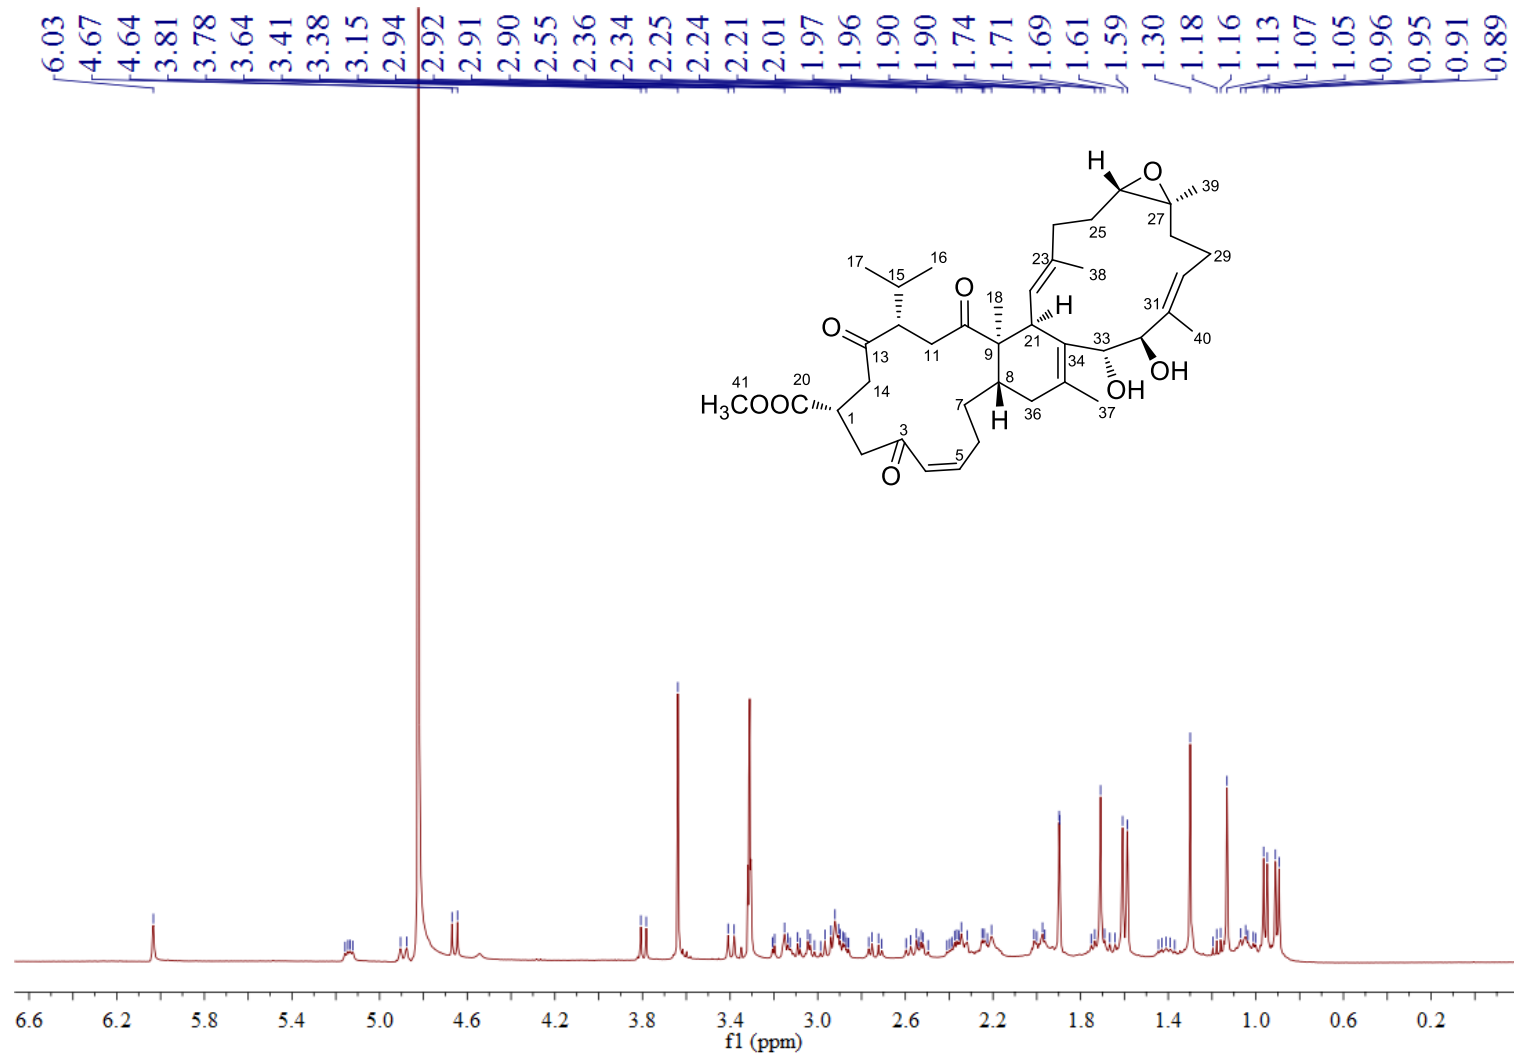

S9

$^{13}\text{C}$  NMR spectrum of **2** in Methanol- $d_4$

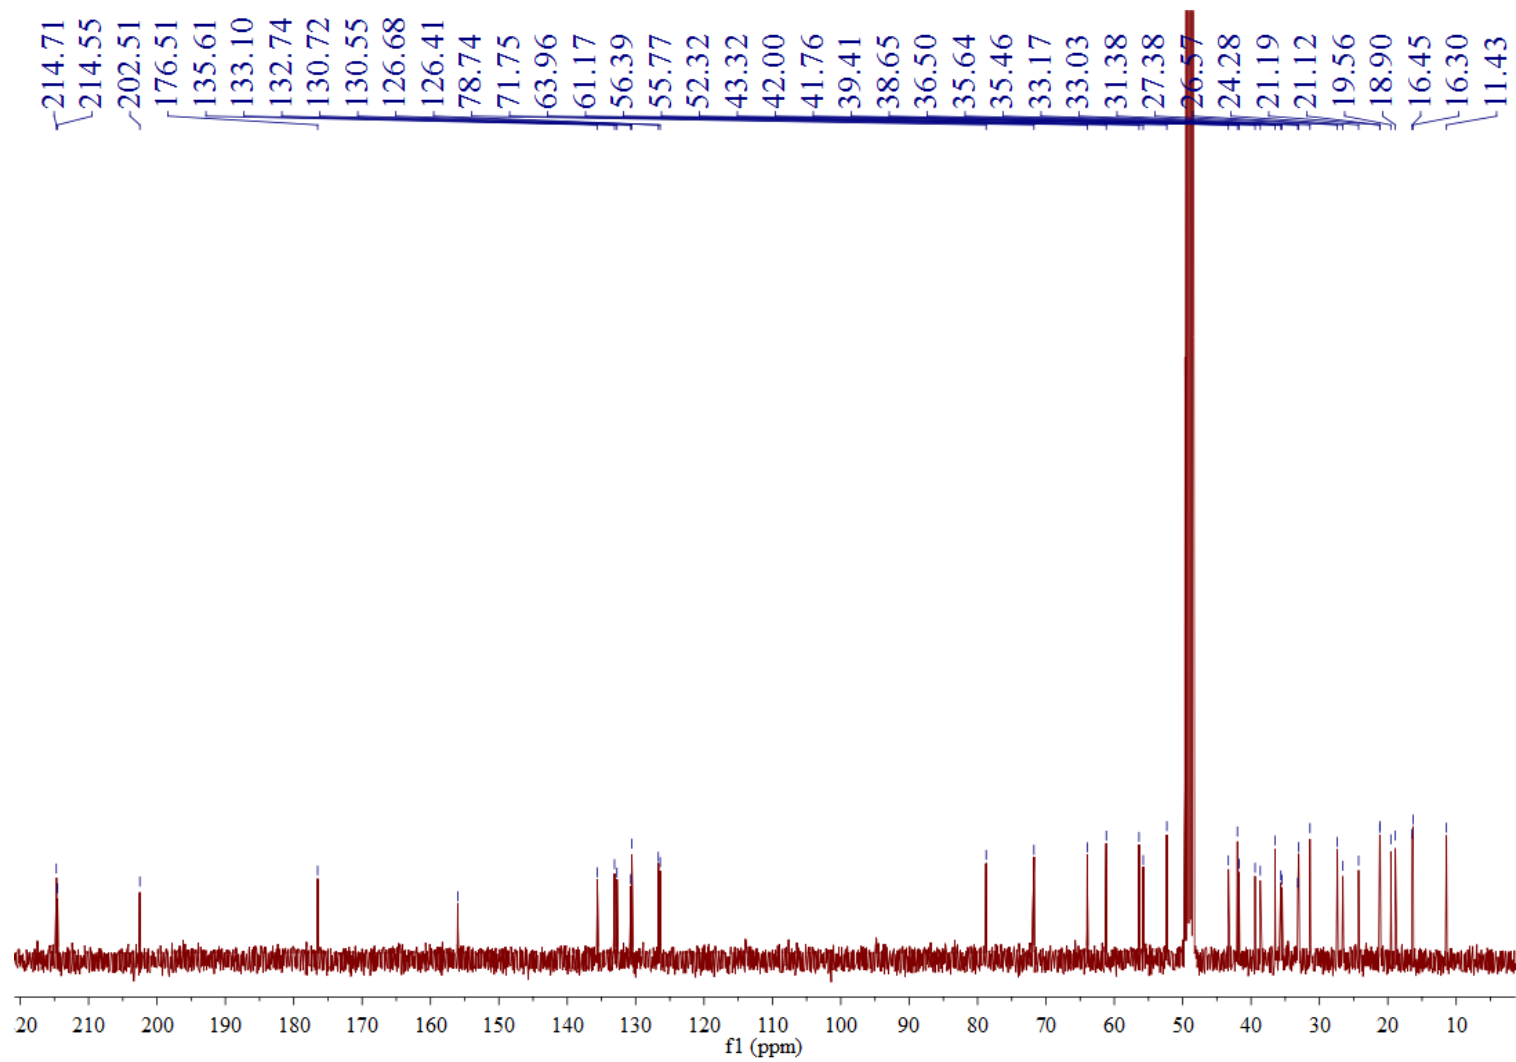

S10 HSQC spectrum of **2** in Methanol- $d_4$

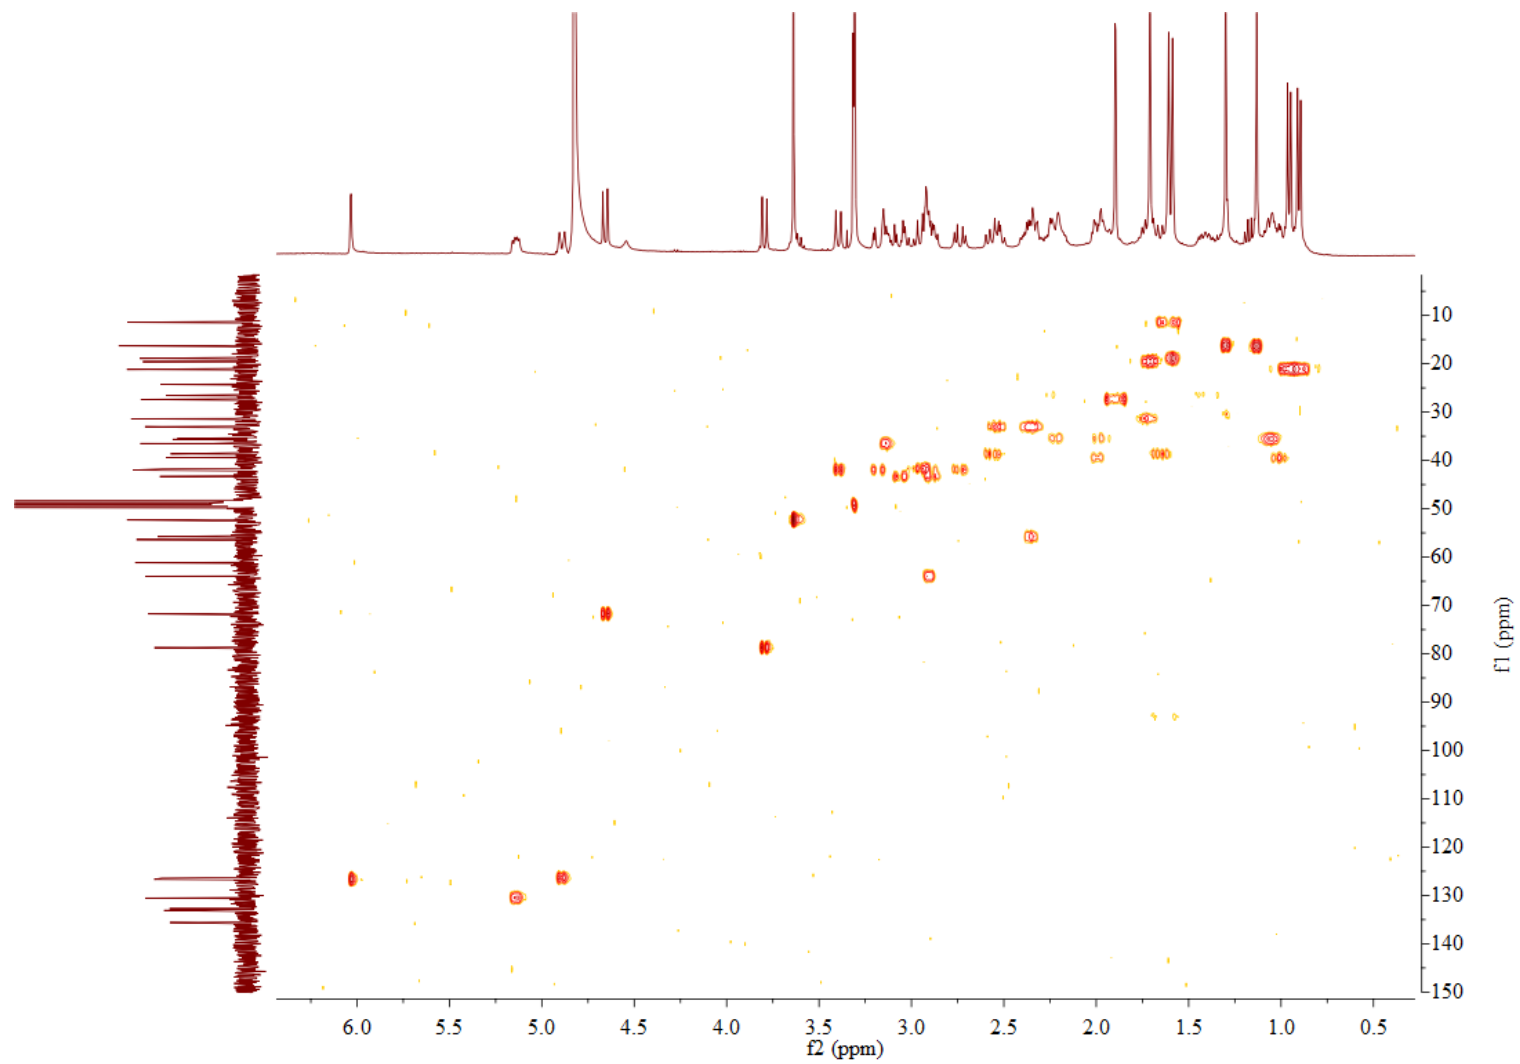

S11 HMBC spectrum of **2** in Methanol- $d_4$

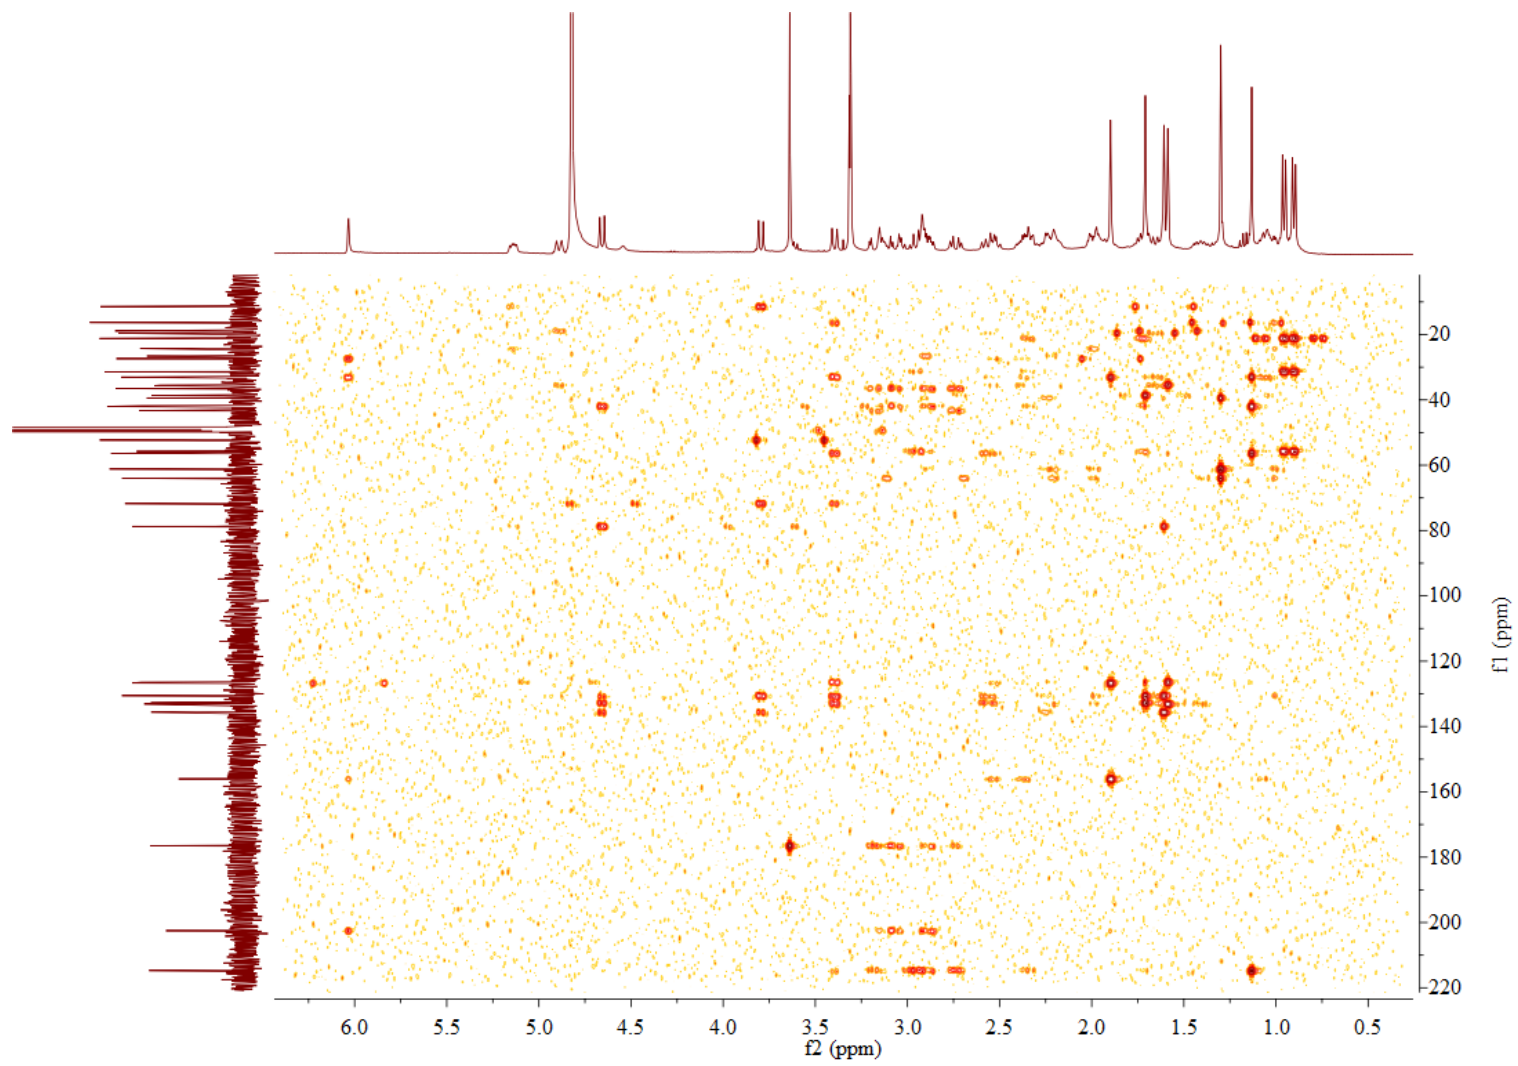

S12  $^1\text{H}$ - $^1\text{H}$  COSY spectrum of **2** in Methanol- $d_4$

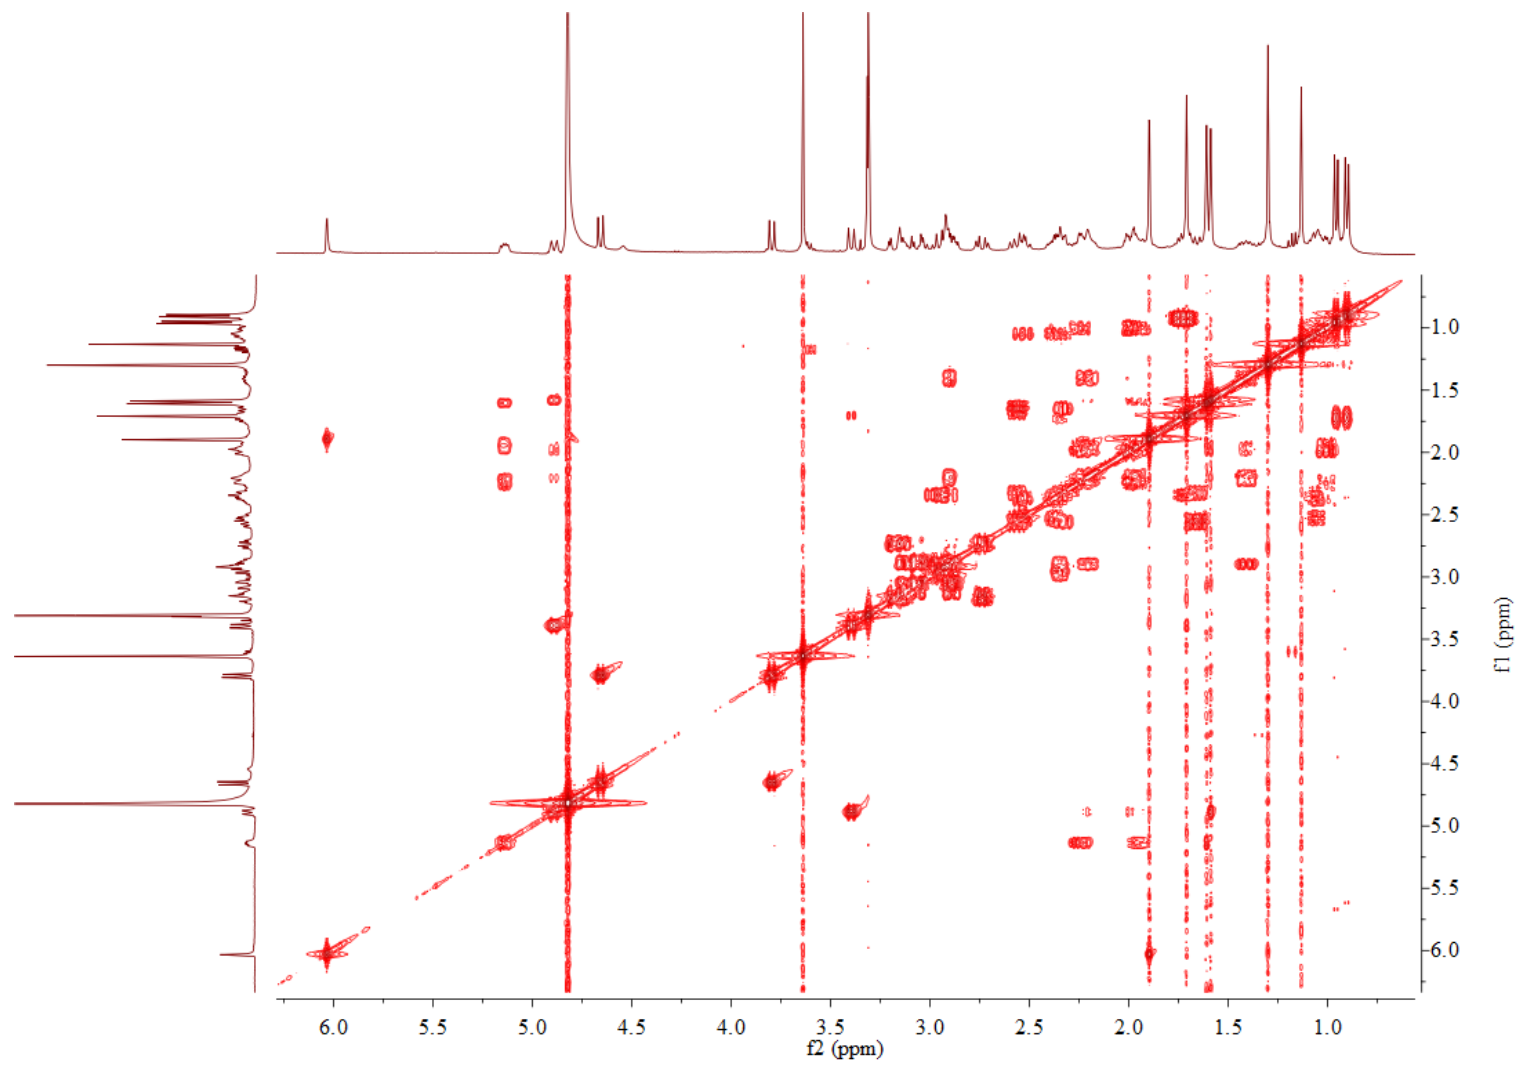



S13 NOESY spectrum of **2** in Methanol- $d_4$

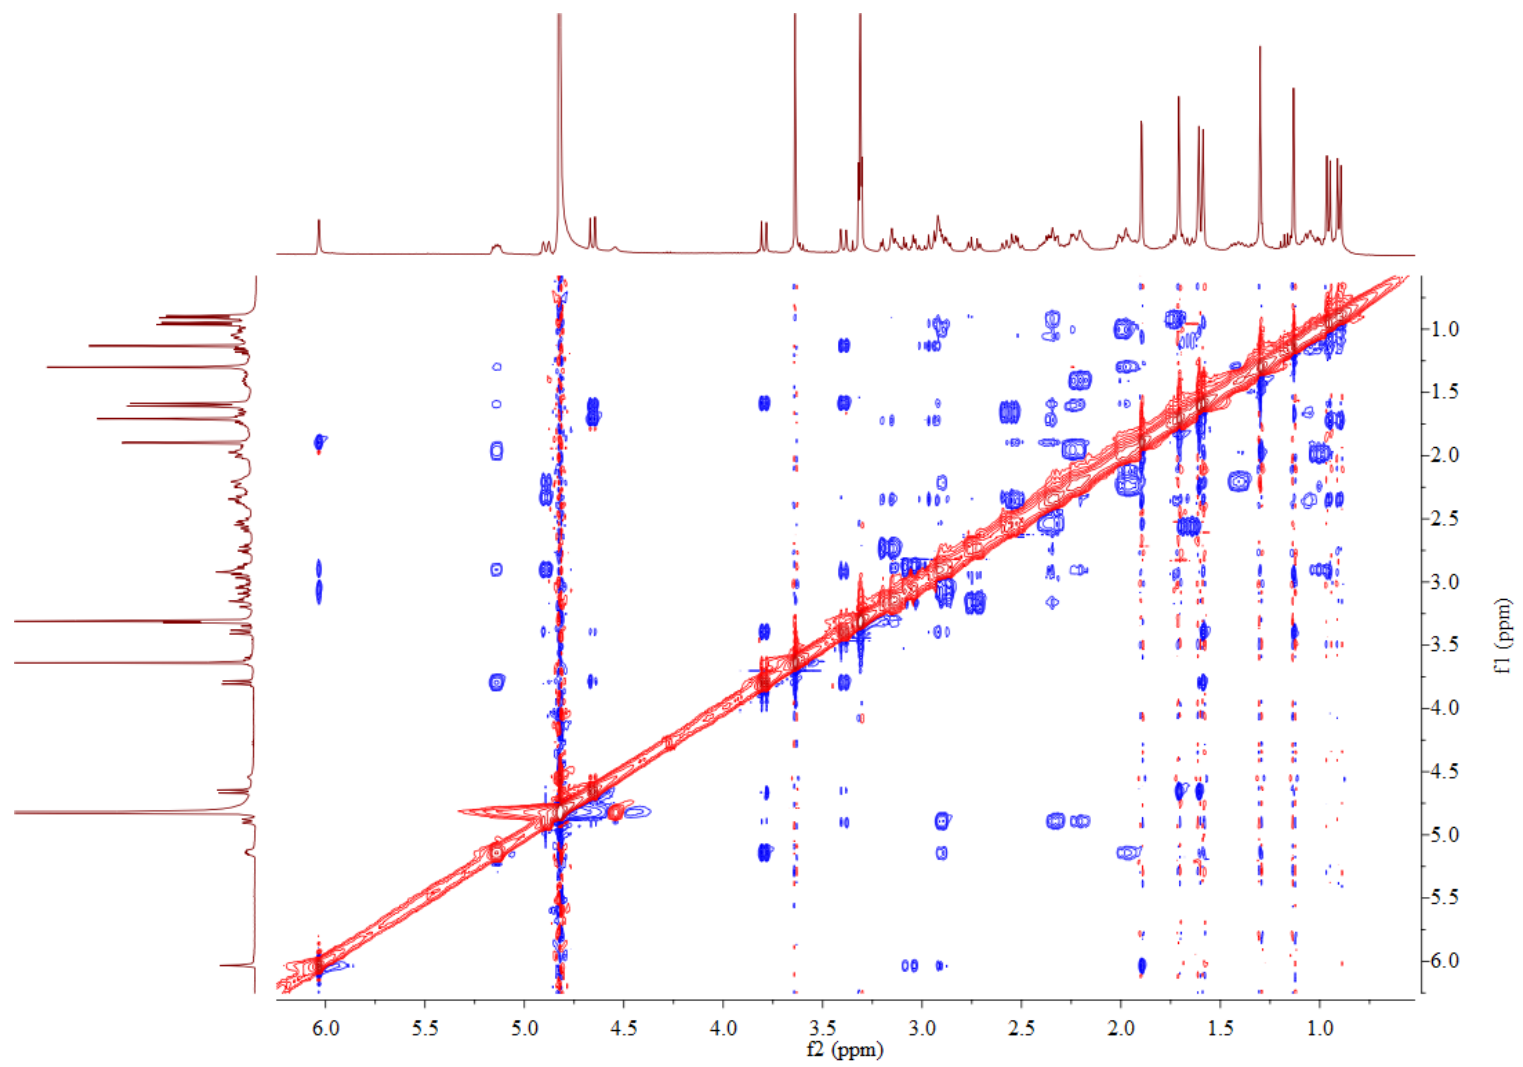

S14 HRESIMS spectrum of 2

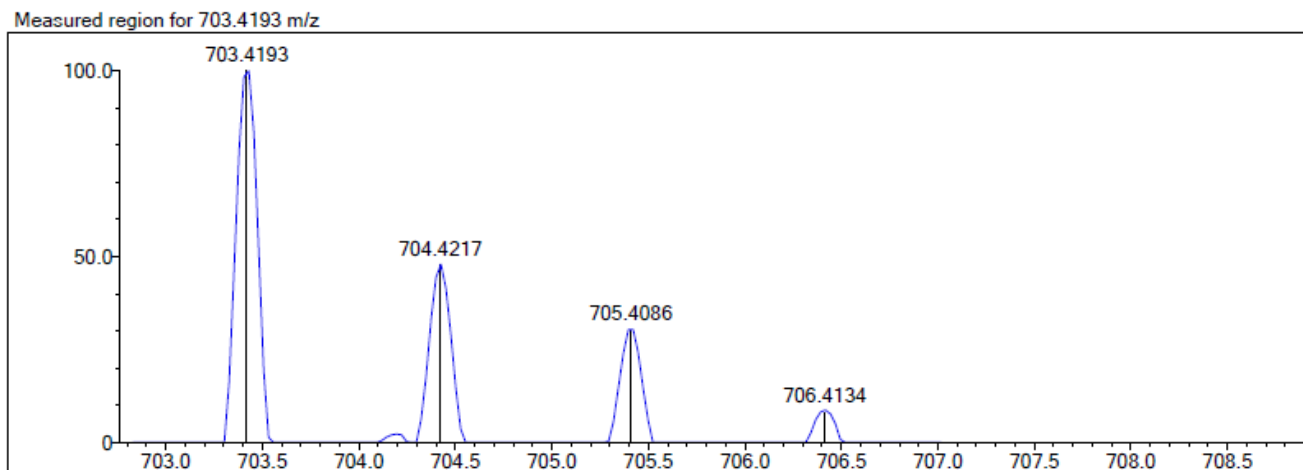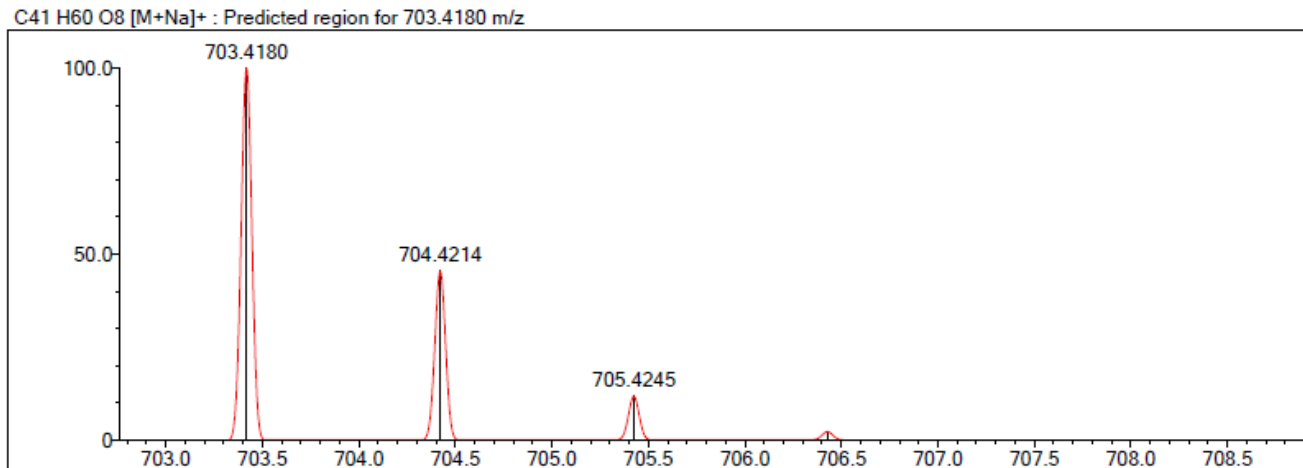

| Rank | Score | Formula (M) | Ion                 | Meas. m/z | Pred. m/z | Df. (mDa) | Df. (ppm) | Iso   | DBE  |
|------|-------|-------------|---------------------|-----------|-----------|-----------|-----------|-------|------|
| 1    | 45.26 | C41 H60 O8  | [M+Na] <sup>+</sup> | 703.4193  | 703.4180  | 1.3       | 1.85      | 46.24 | 12.0 |

S15 <sup>1</sup>H NMR spectrum of **3** in Methanol-*d*<sub>4</sub>

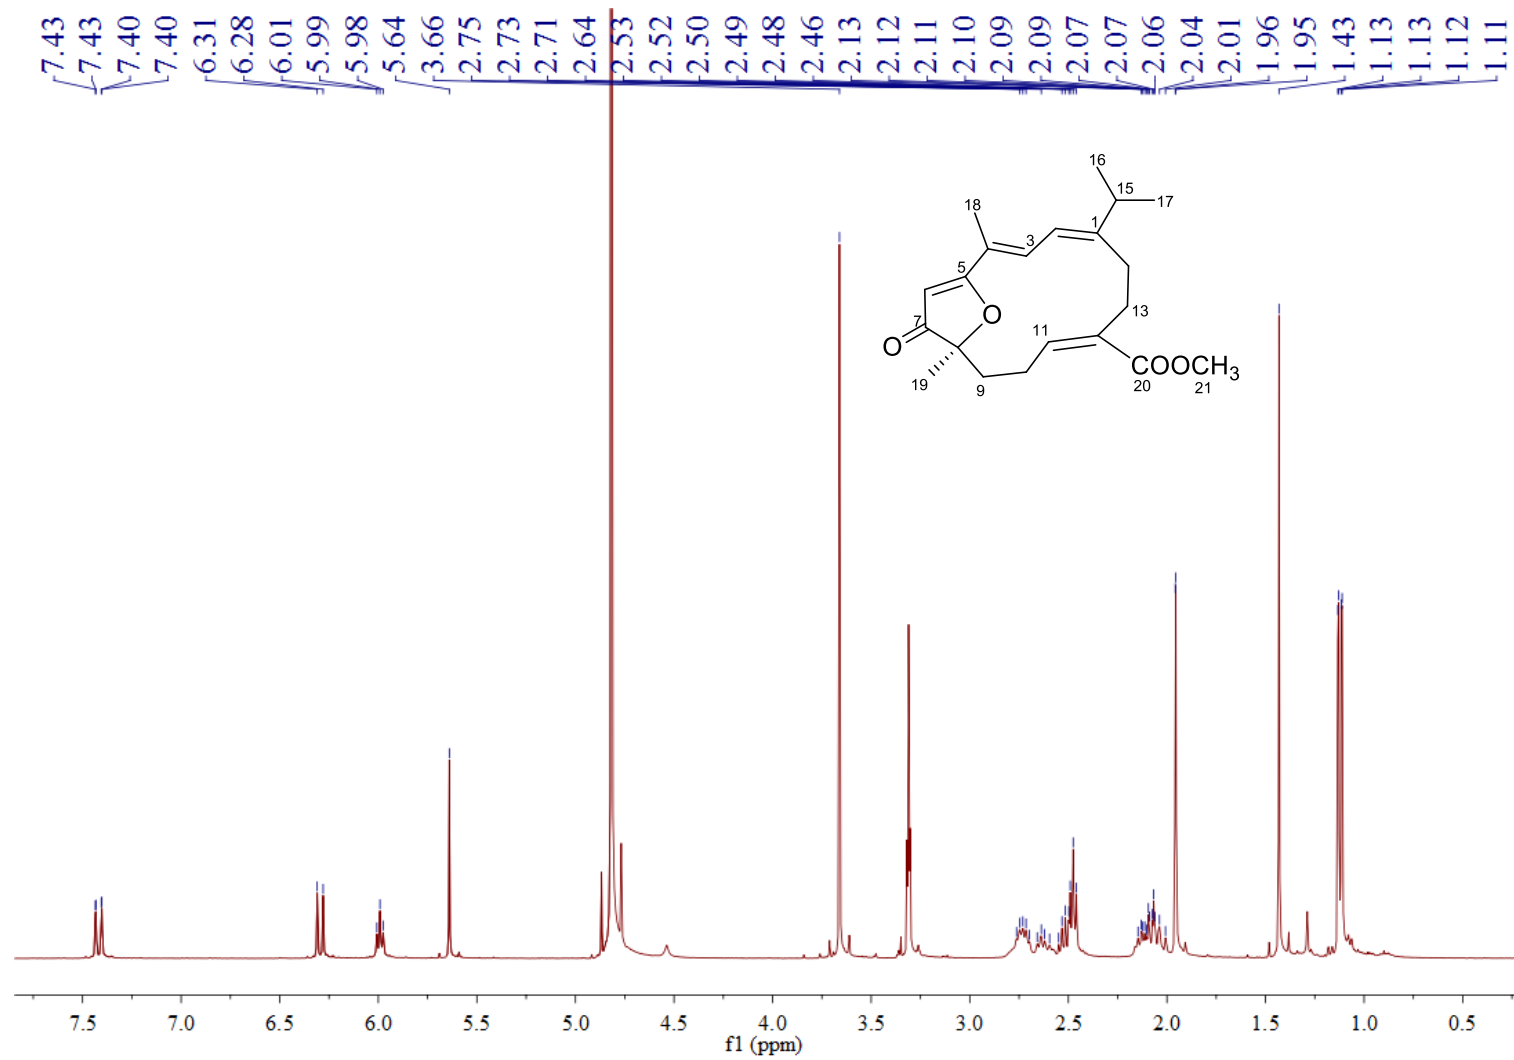

S16  $^{13}\text{C}$  NMR spectrum of **3** in Methanol- $d_4$

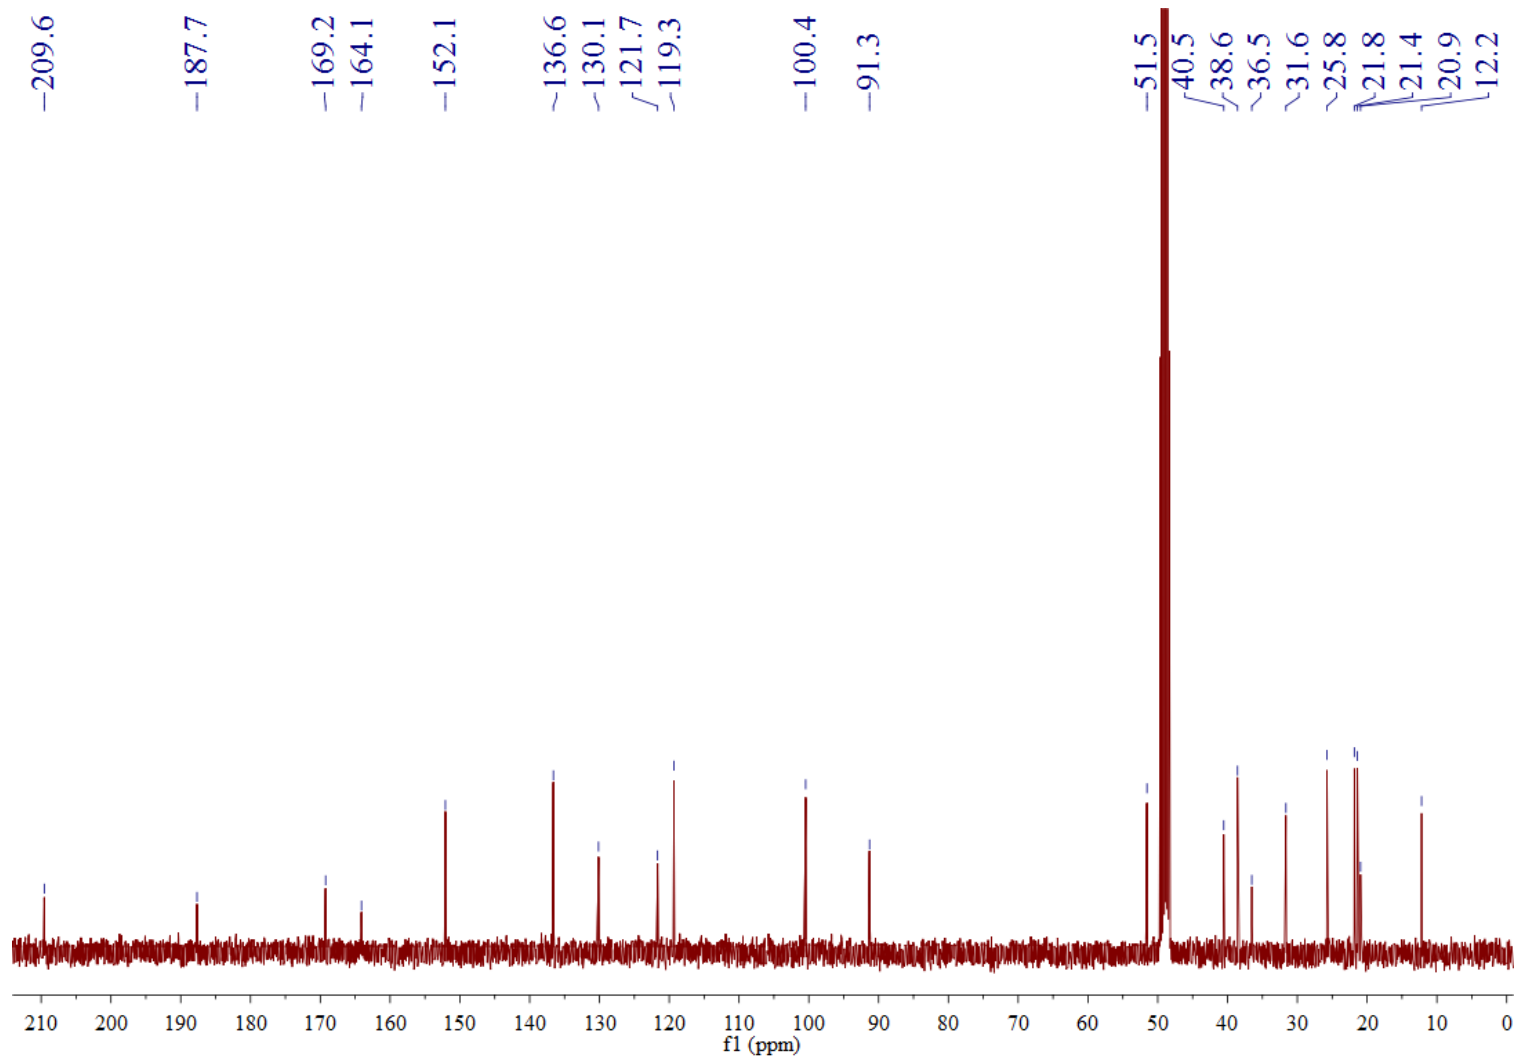

S17 HSQC spectrum of **3** in Methanol- $d_4$

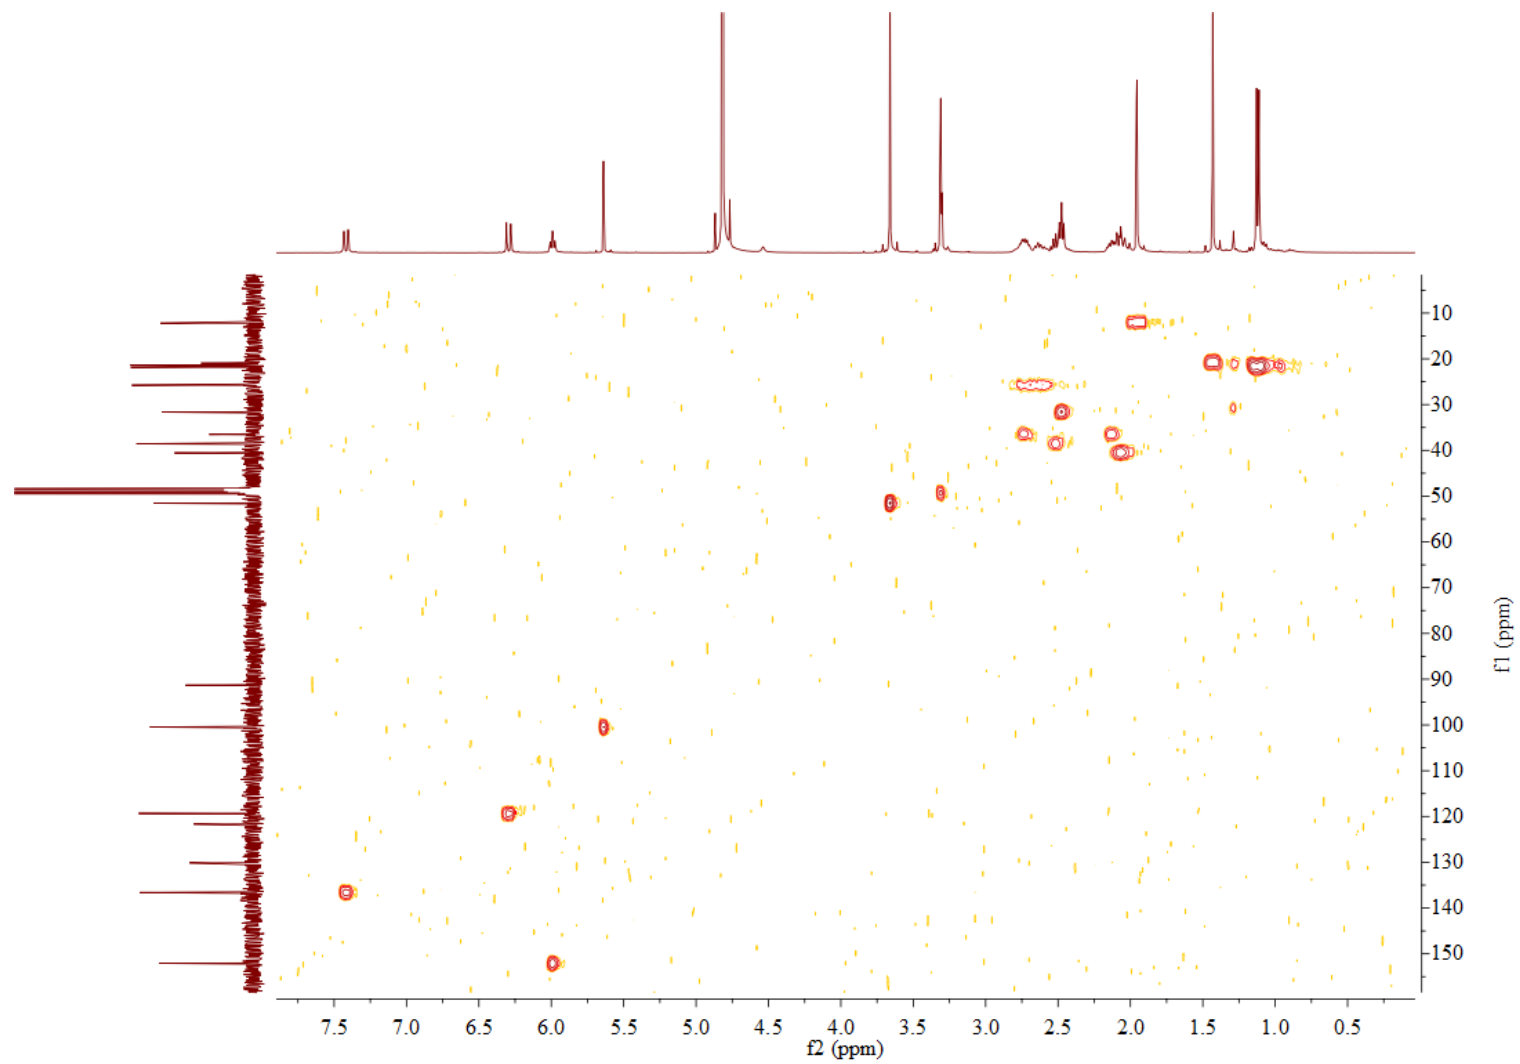

S18 HMBC spectrum of 3 in Methanol- $d_4$

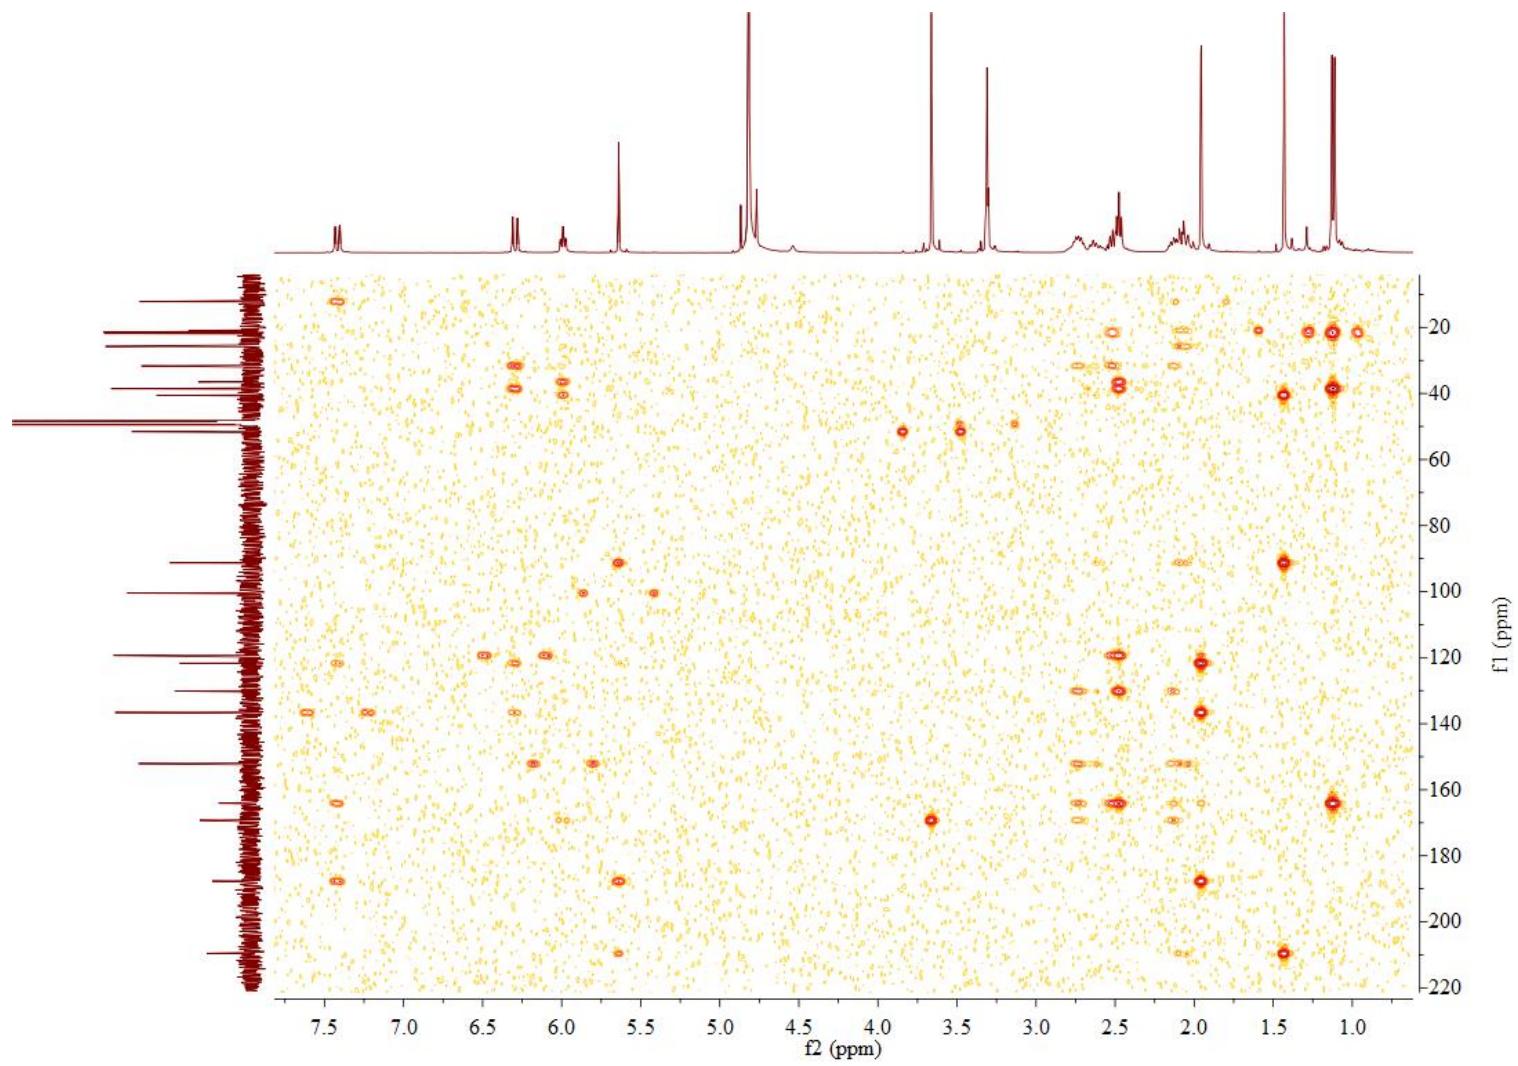

S19  $^1\text{H}$ - $^1\text{H}$  COSY spectrum of **3** in Methanol- $d_4$

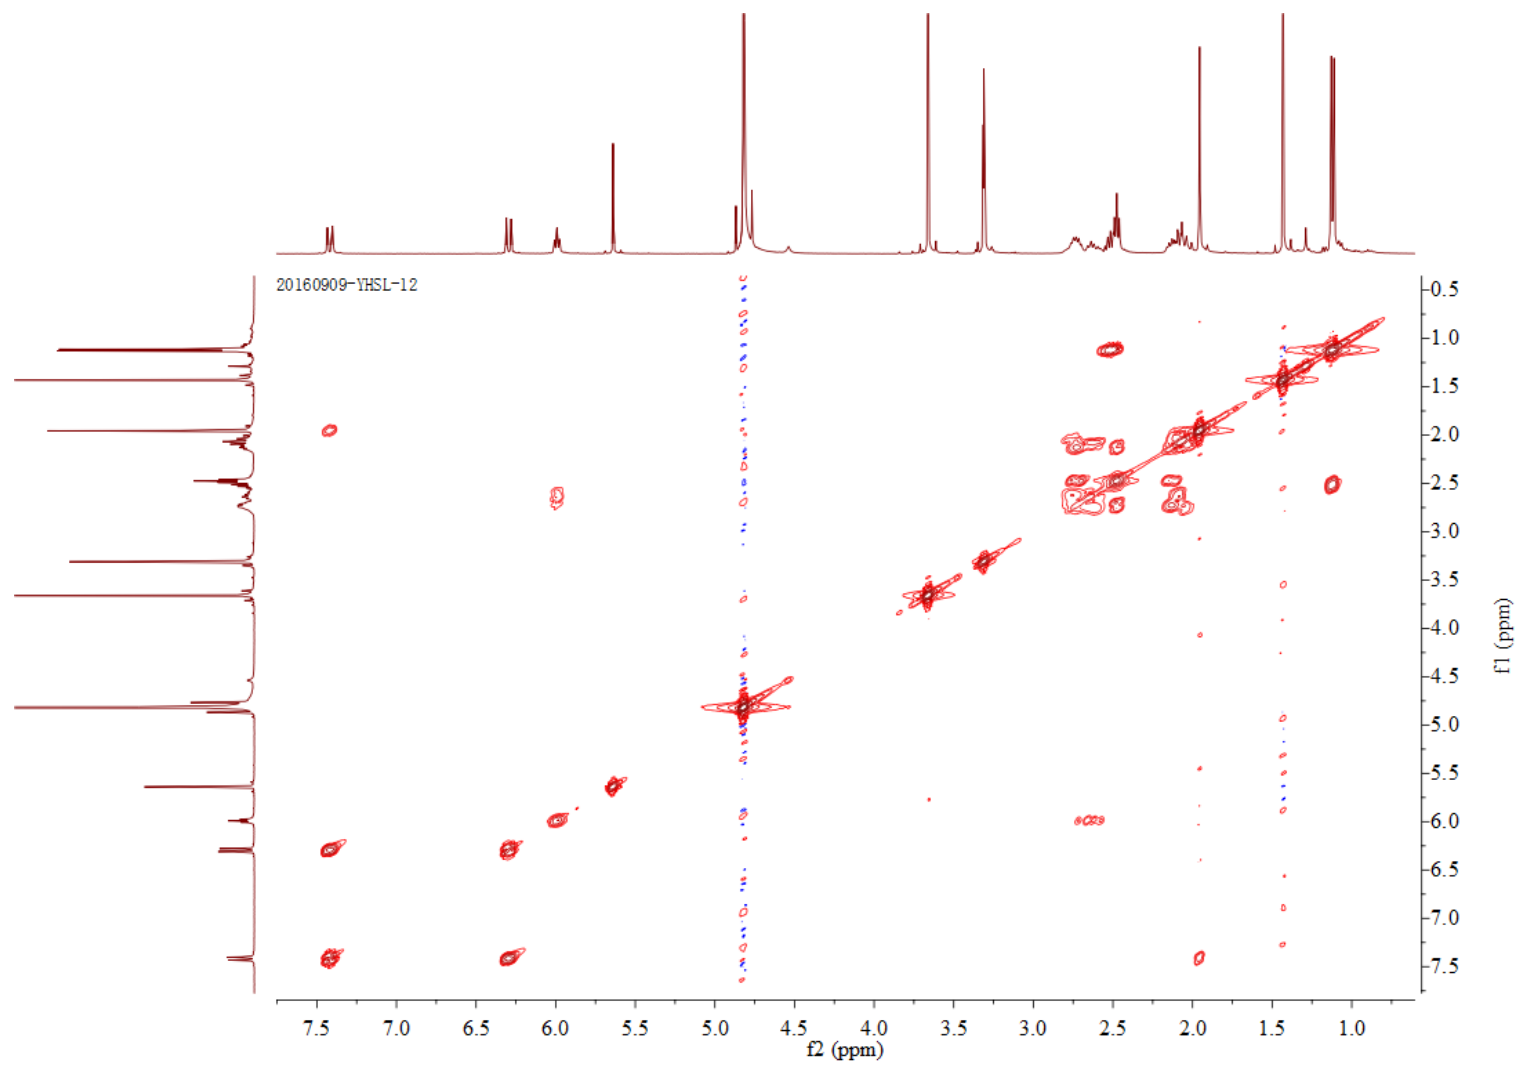

S20 NOESY spectrum of **3** in Methanol- $d_4$

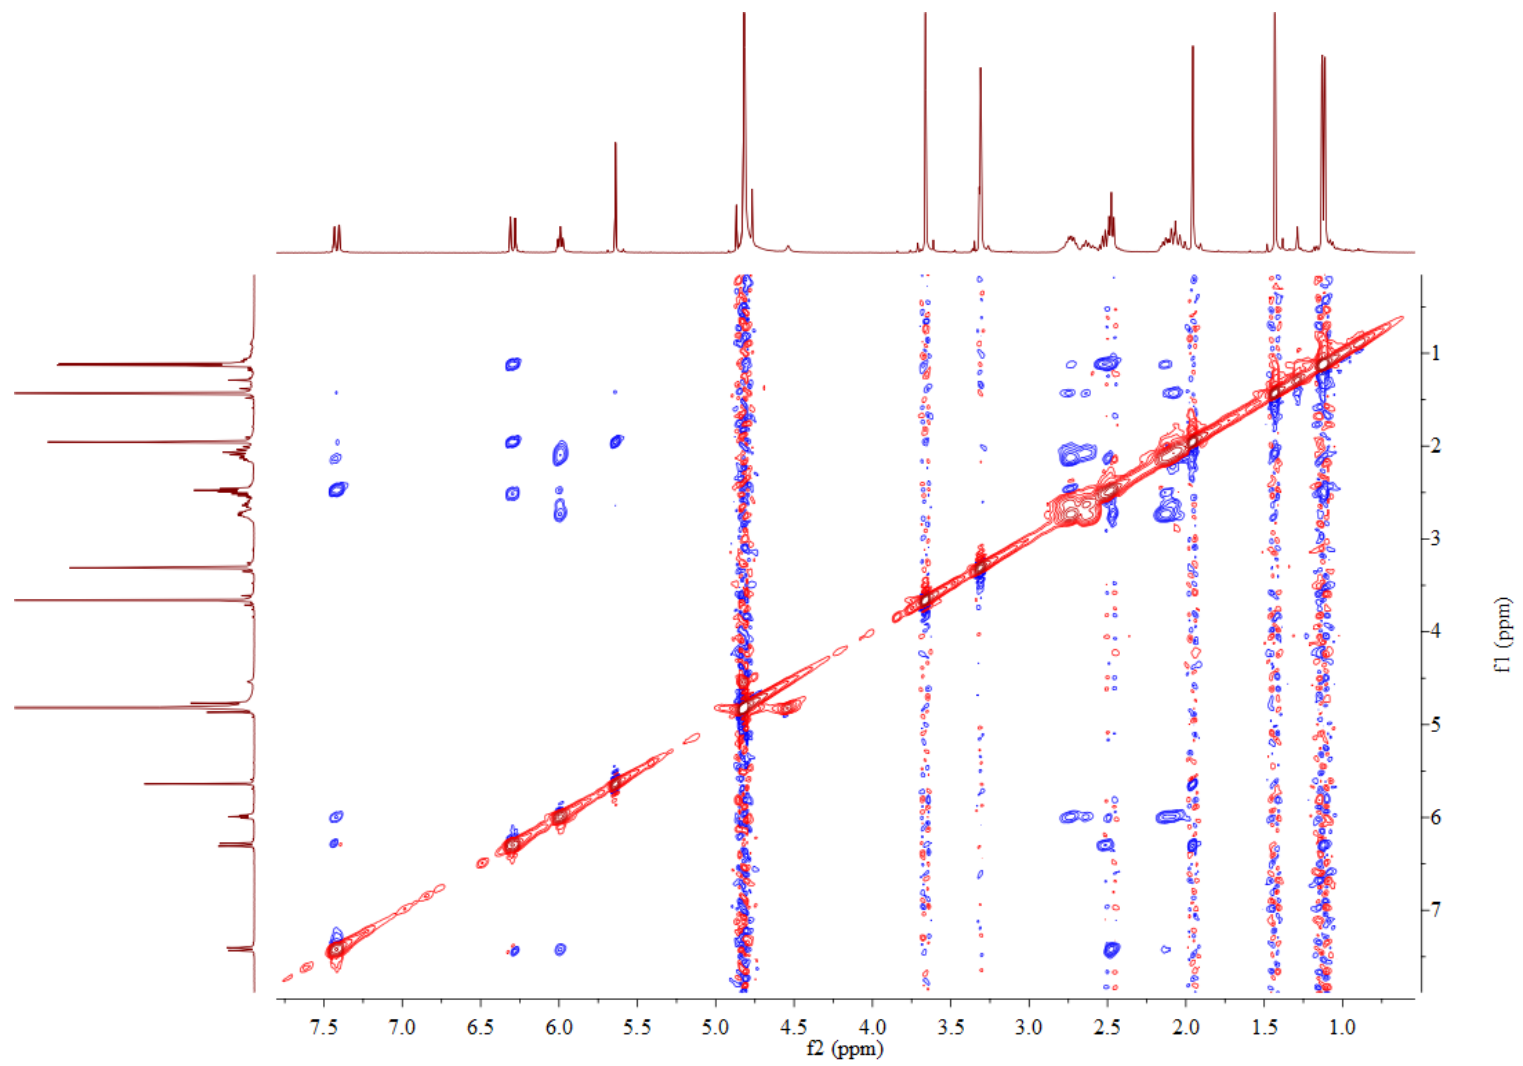



S21 HRESIMS spectrum of **3**

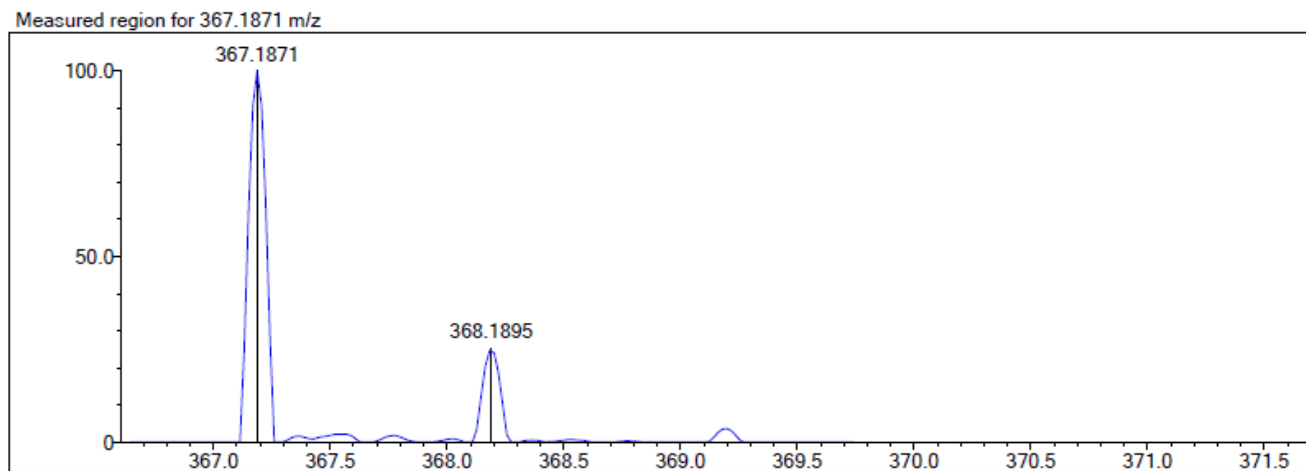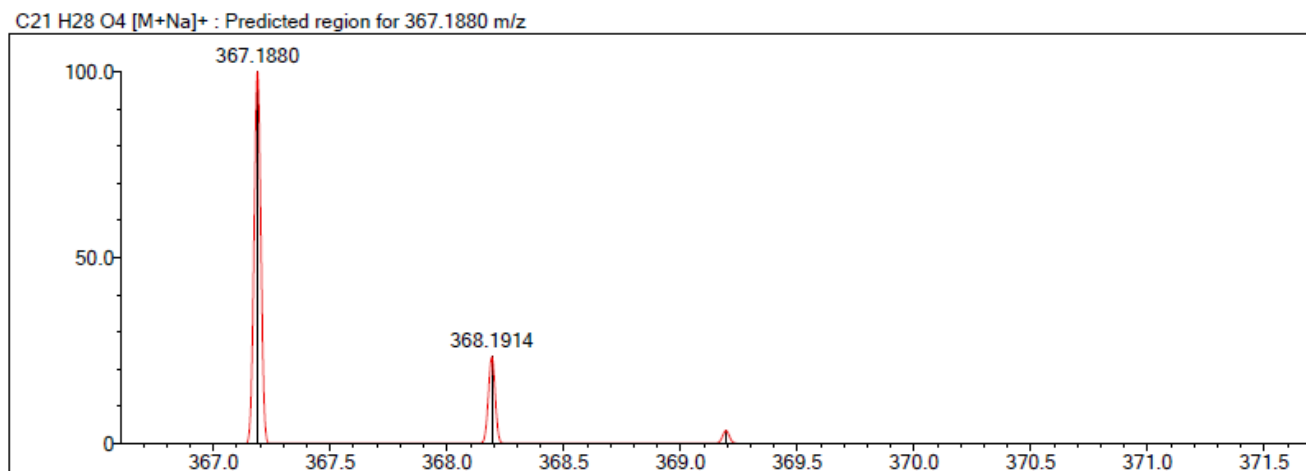

| Rank | Score | Formula (M) | Ion                 | Meas. m/z | Pred. m/z | Df. (mDa) | Df. (ppm) | Iso   | DBE |
|------|-------|-------------|---------------------|-----------|-----------|-----------|-----------|-------|-----|
| 1    | 81.94 | C21 H28 O4  | [M+Na] <sup>+</sup> | 367.1871  | 367.1880  | -0.9      | -2.45     | 85.02 | 8.0 |

S22 <sup>1</sup>H NMR spectrum of 4 in Methanol-d<sub>4</sub>

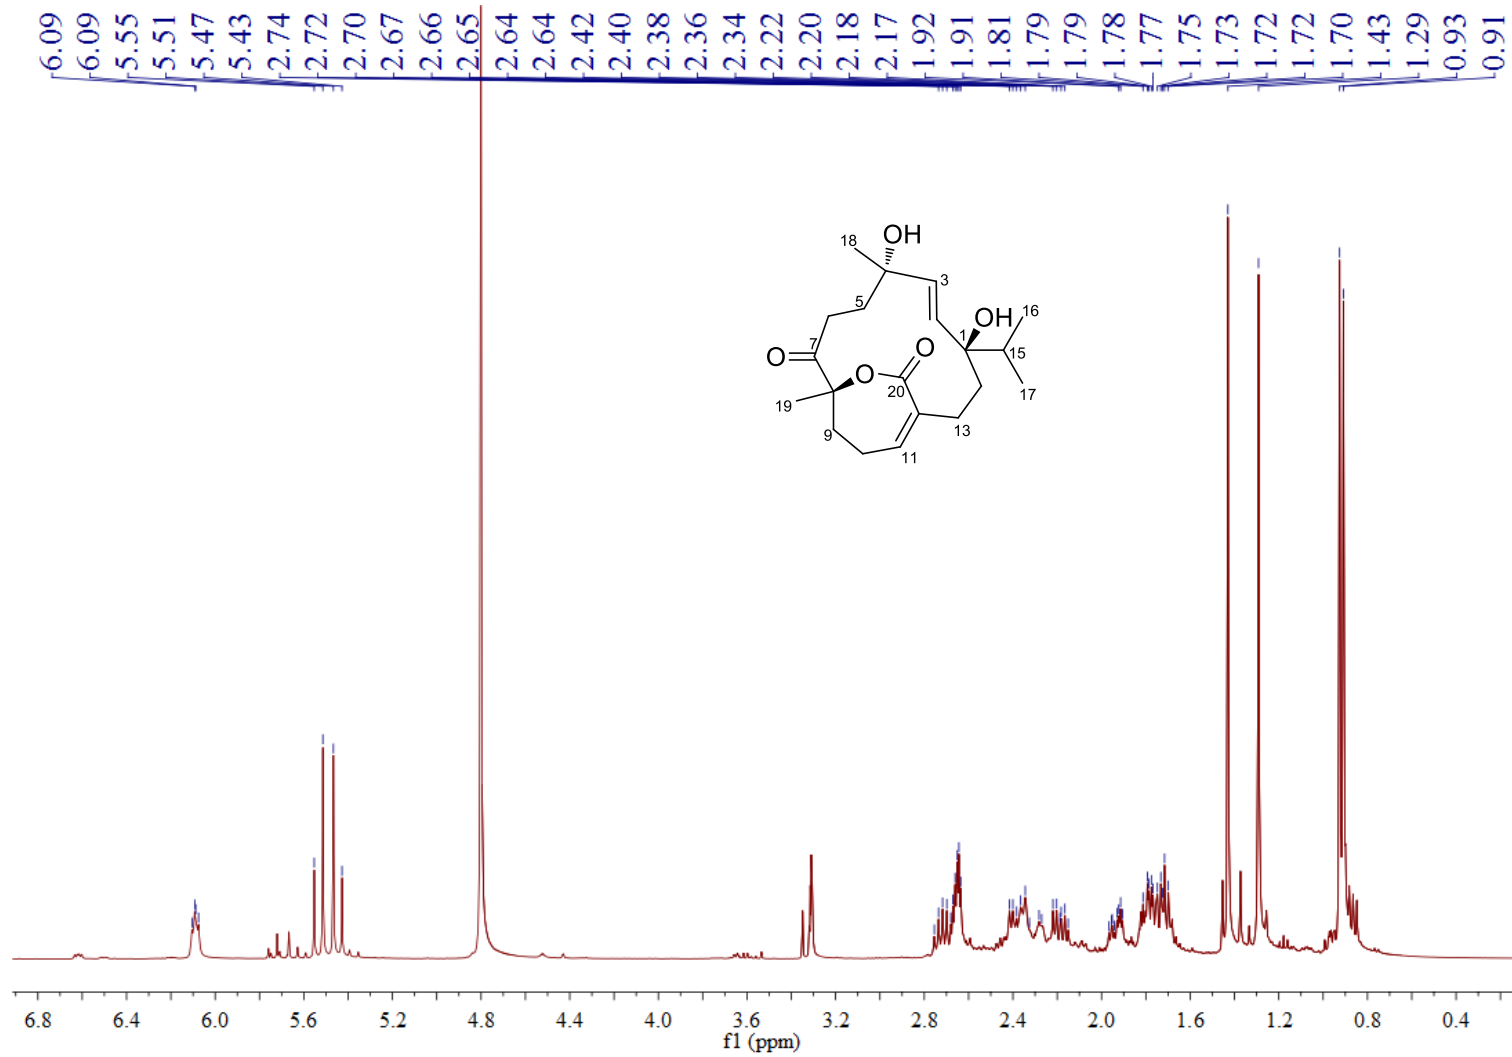

S23  $^{13}\text{C}$  NMR spectrum of **4** in Methanol- $d_4$

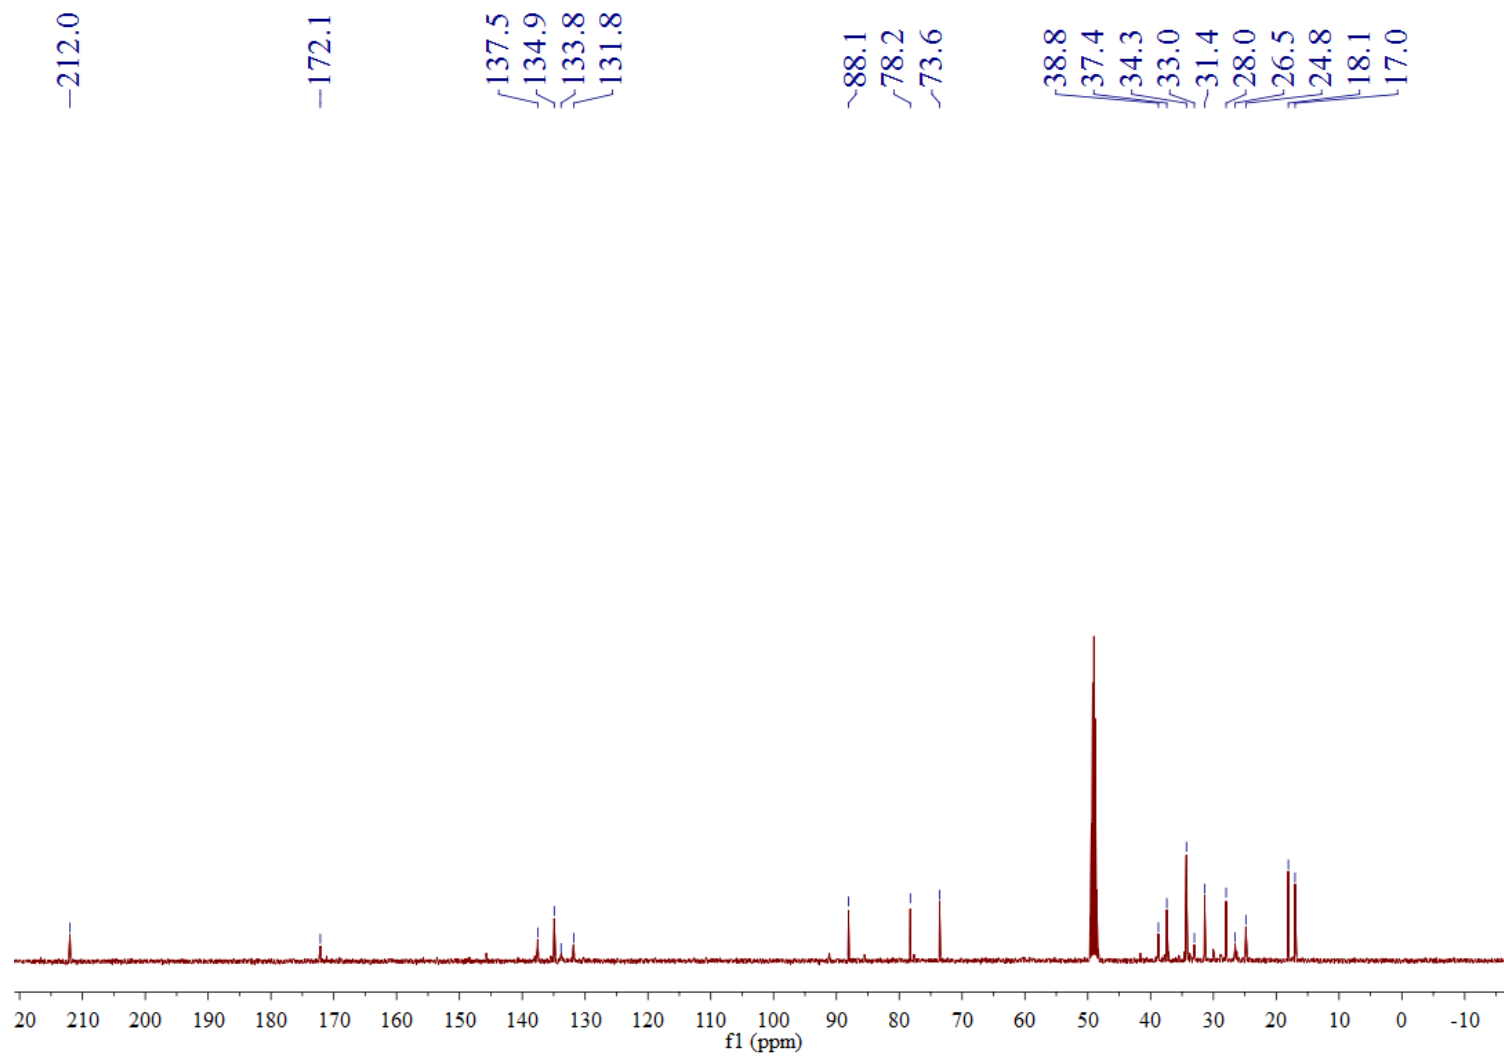

S24 HSQC spectrum of **4** in Methanol- $d_4$

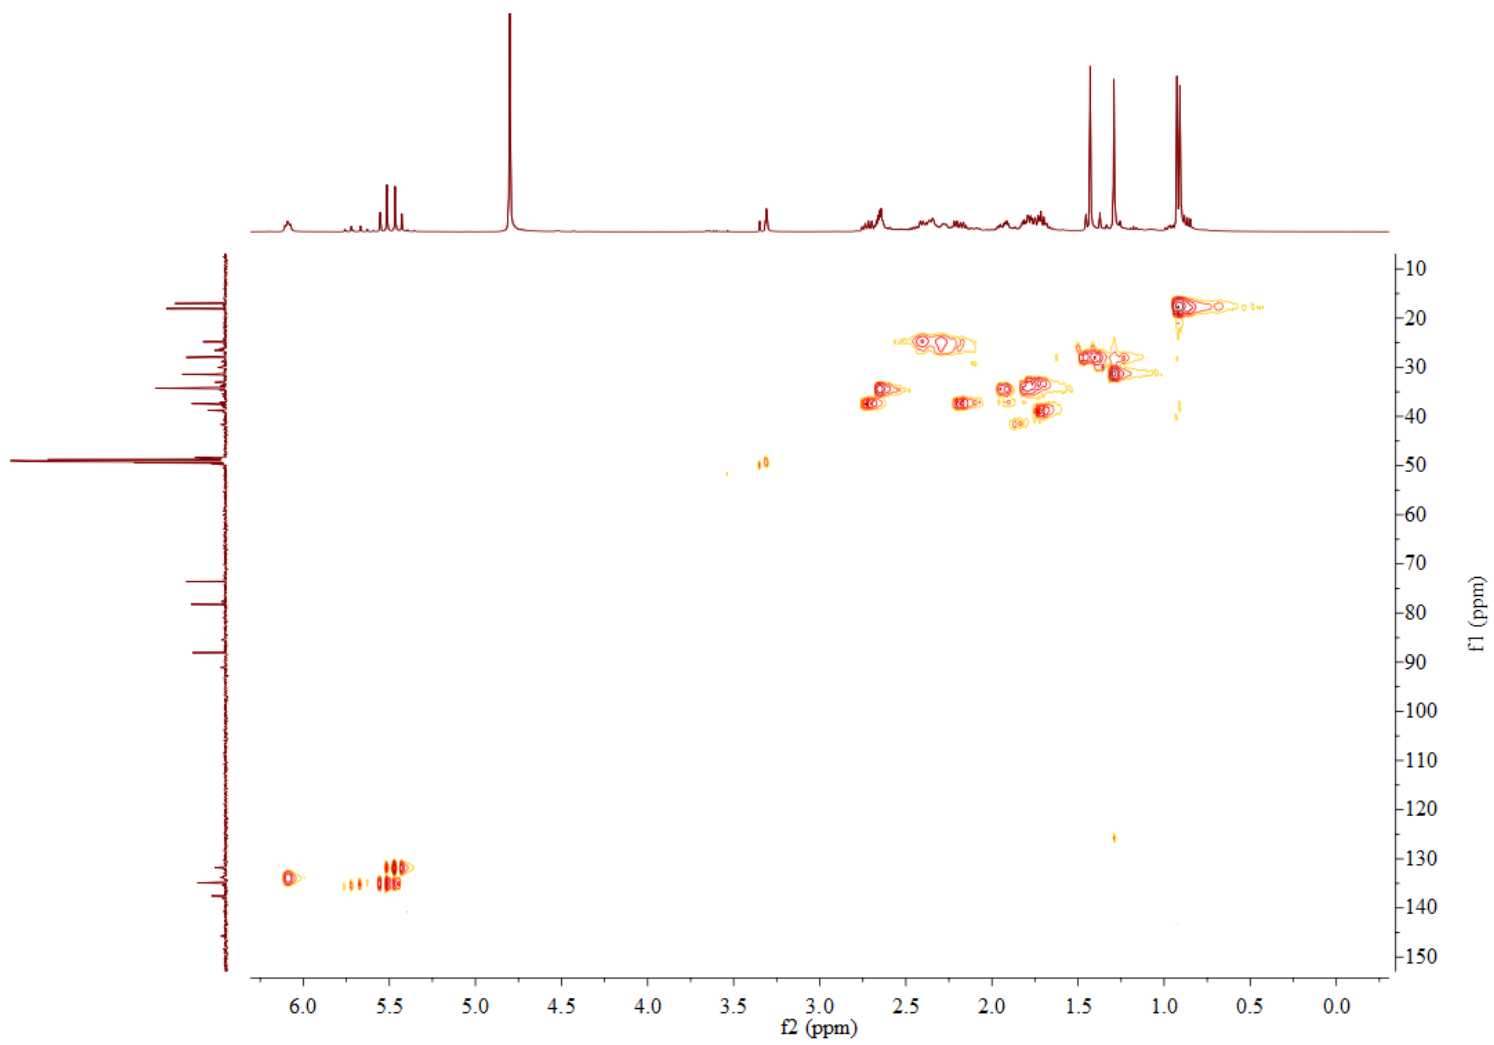

S25 HMBC spectrum of **4** in Methanol- $d_4$

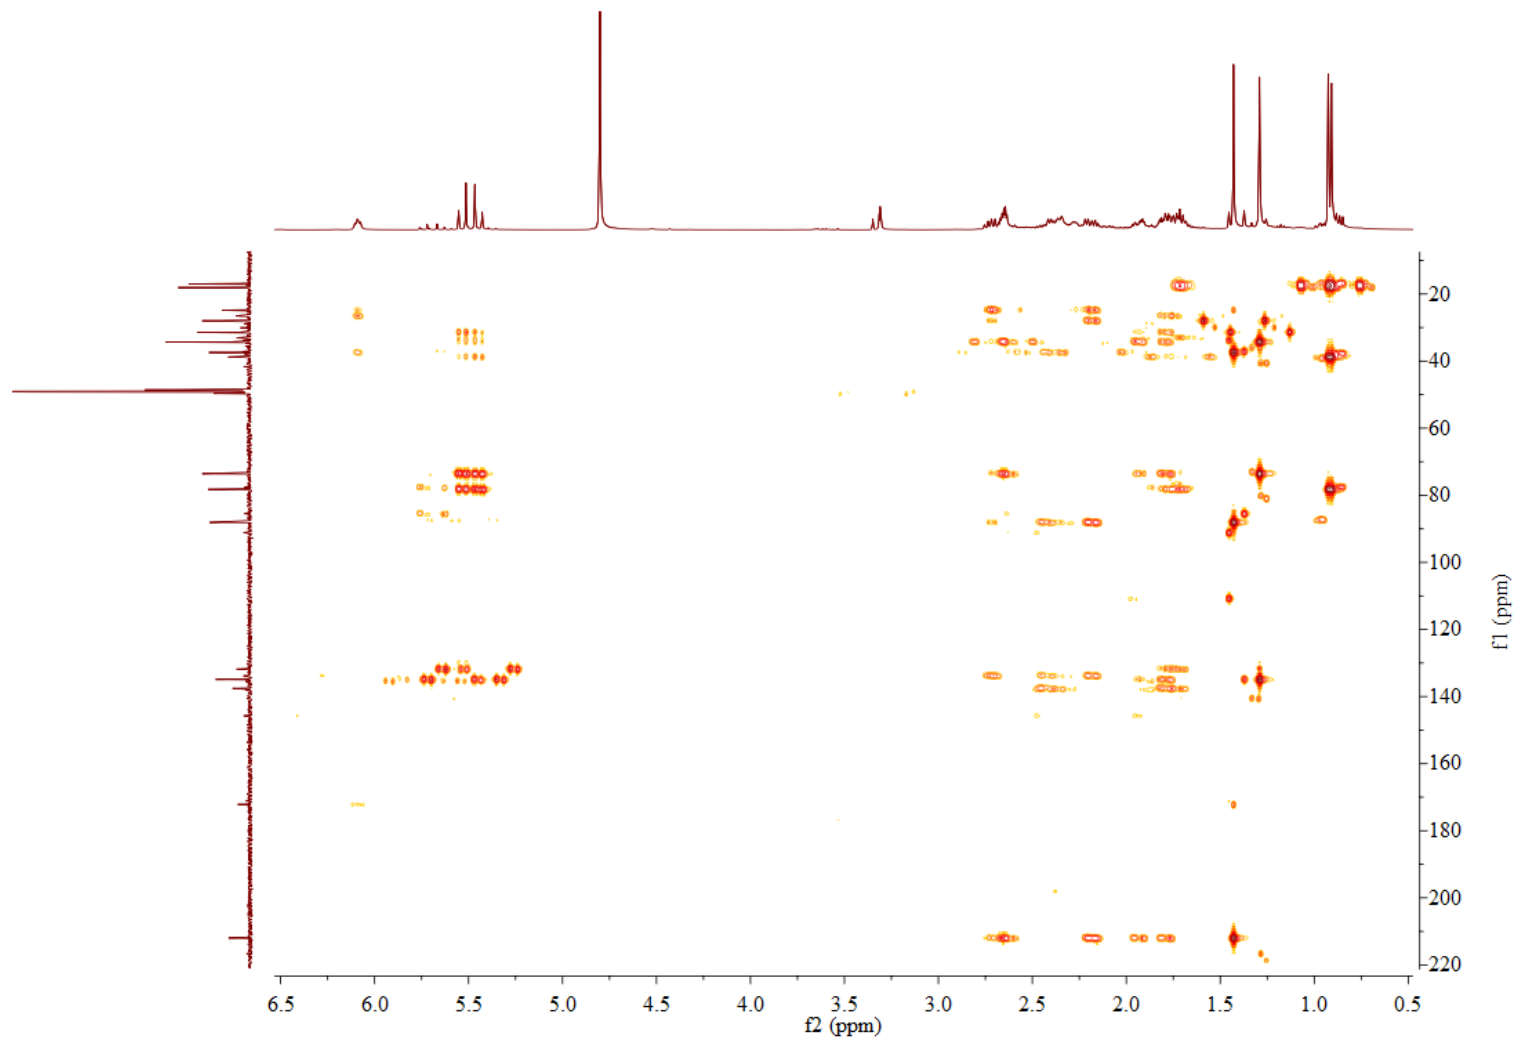

S26

$^1\text{H}$ - $^1\text{H}$  COSY spectrum of **4** in Methanol- $d_4$

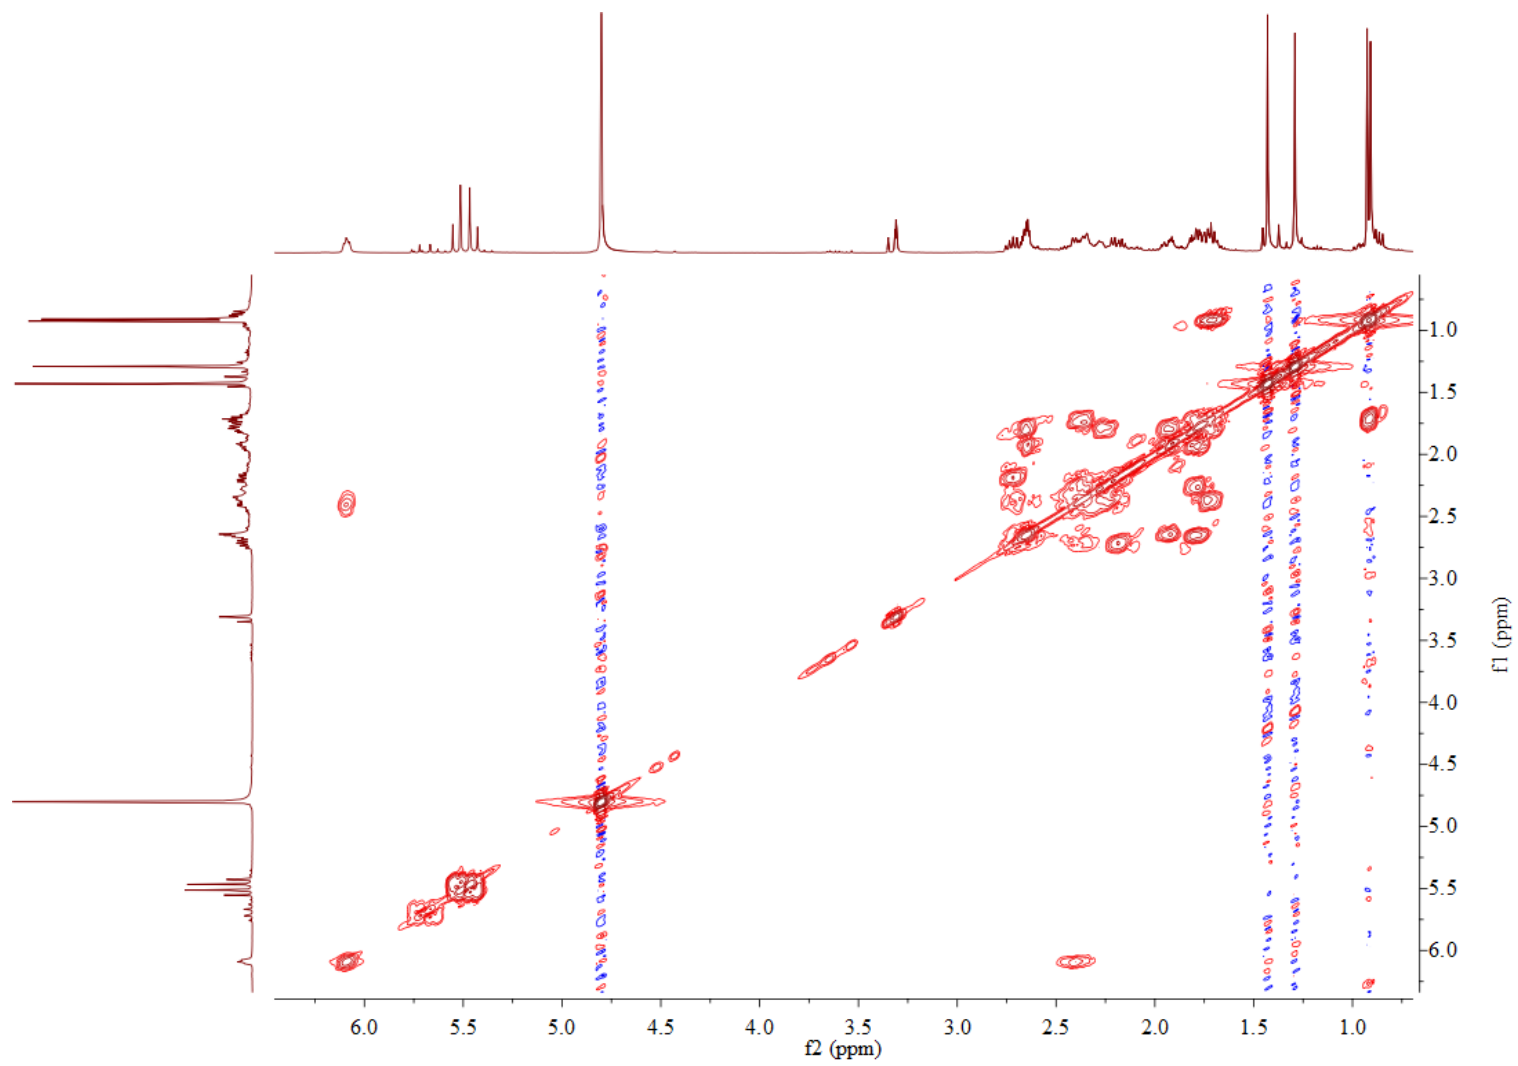

S27 NOESY spectrum of **4** in Methanol- $d_4$

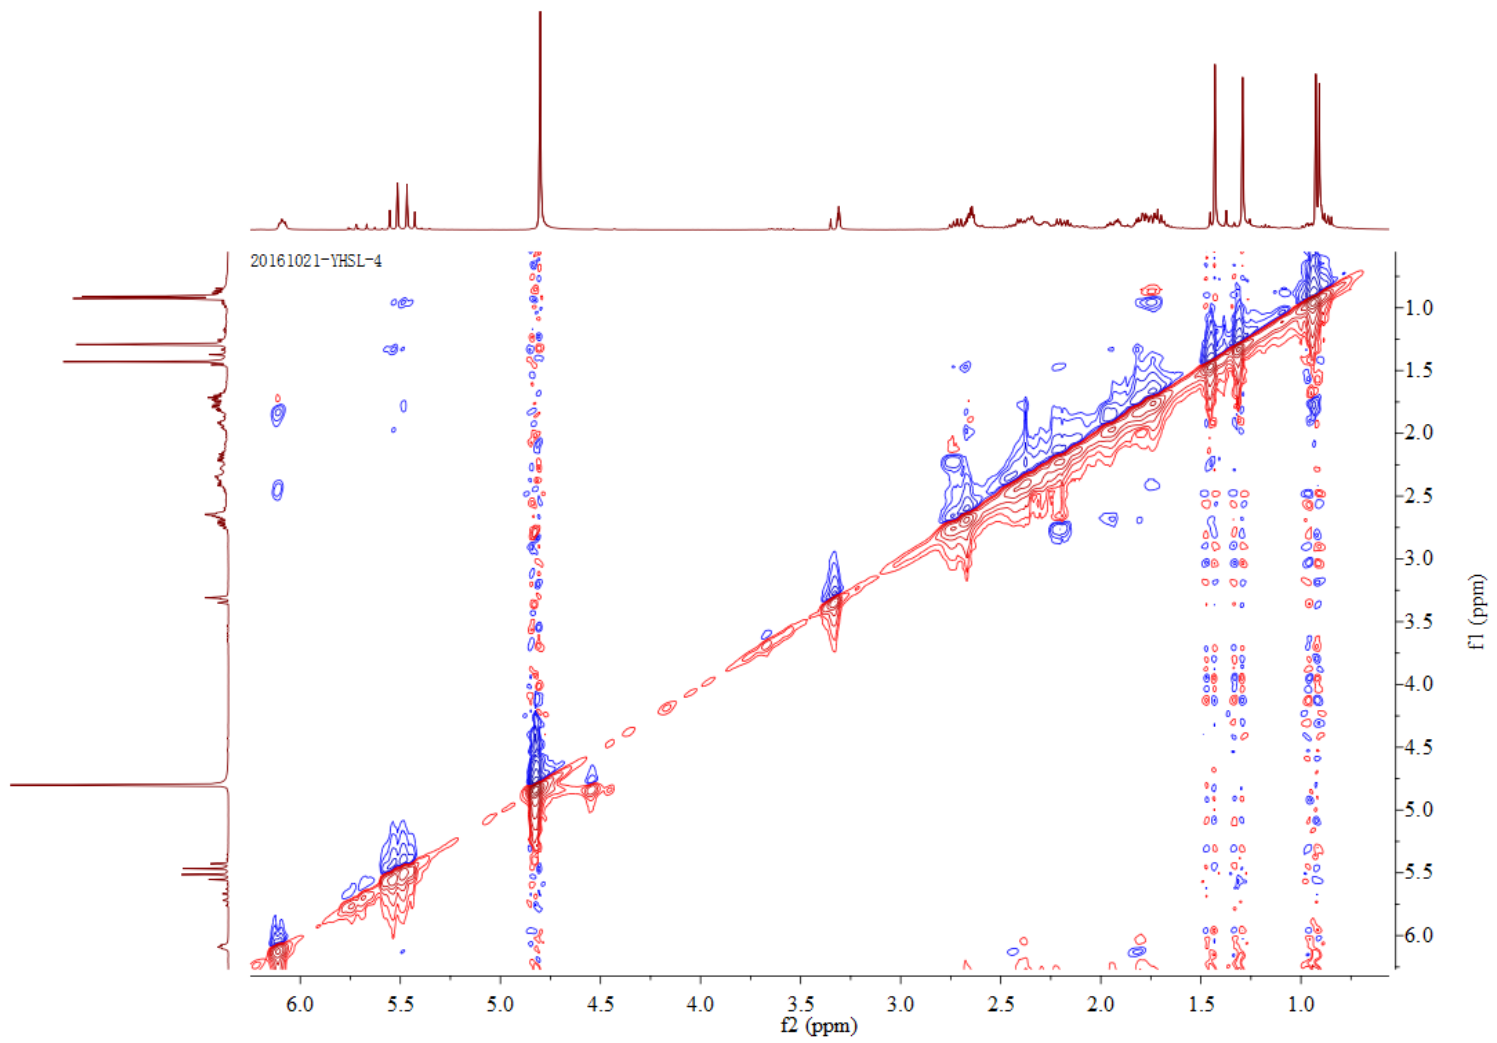

S28

HRESIMS spectrum of **4**

Measured region for 373.1979 m/z

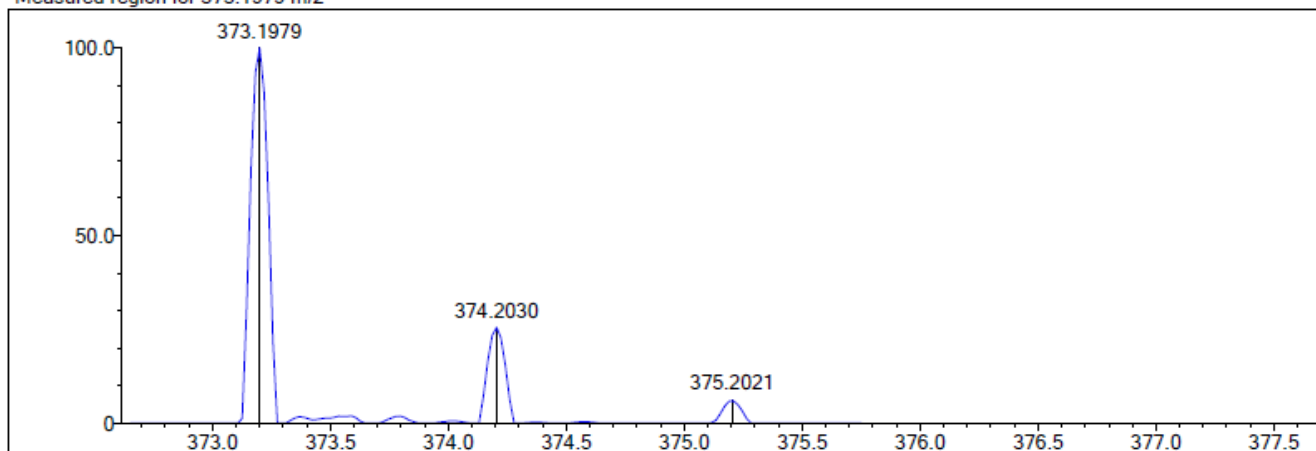

C<sub>20</sub>H<sub>30</sub>O<sub>5</sub> [M+Na]<sup>+</sup>: Predicted region for 373.1985 m/z

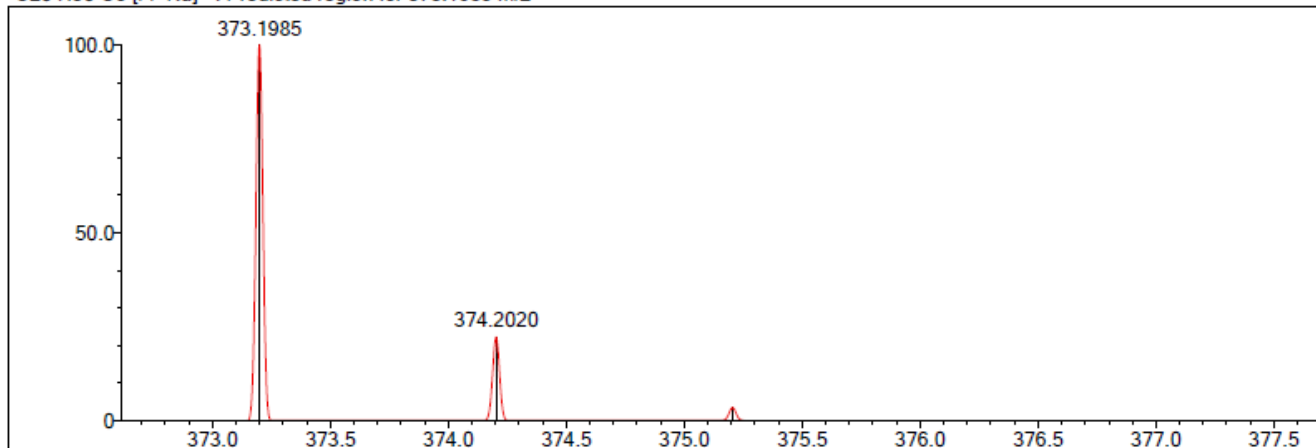

| Rank | Score | Formula (M)                                    | Ion                 | Meas. m/z | Pred. m/z | Df. (mDa) | Df. (ppm) | Iso   | DBE |
|------|-------|------------------------------------------------|---------------------|-----------|-----------|-----------|-----------|-------|-----|
| 1    | 73.21 | C <sub>20</sub> H <sub>30</sub> O <sub>5</sub> | [M+Na] <sup>+</sup> | 373.1979  | 373.1985  | -0.6      | -1.61     | 74.35 | 6.0 |



S29 <sup>1</sup>H NMR spectrum of **5** in Methanol-*d*<sub>4</sub>

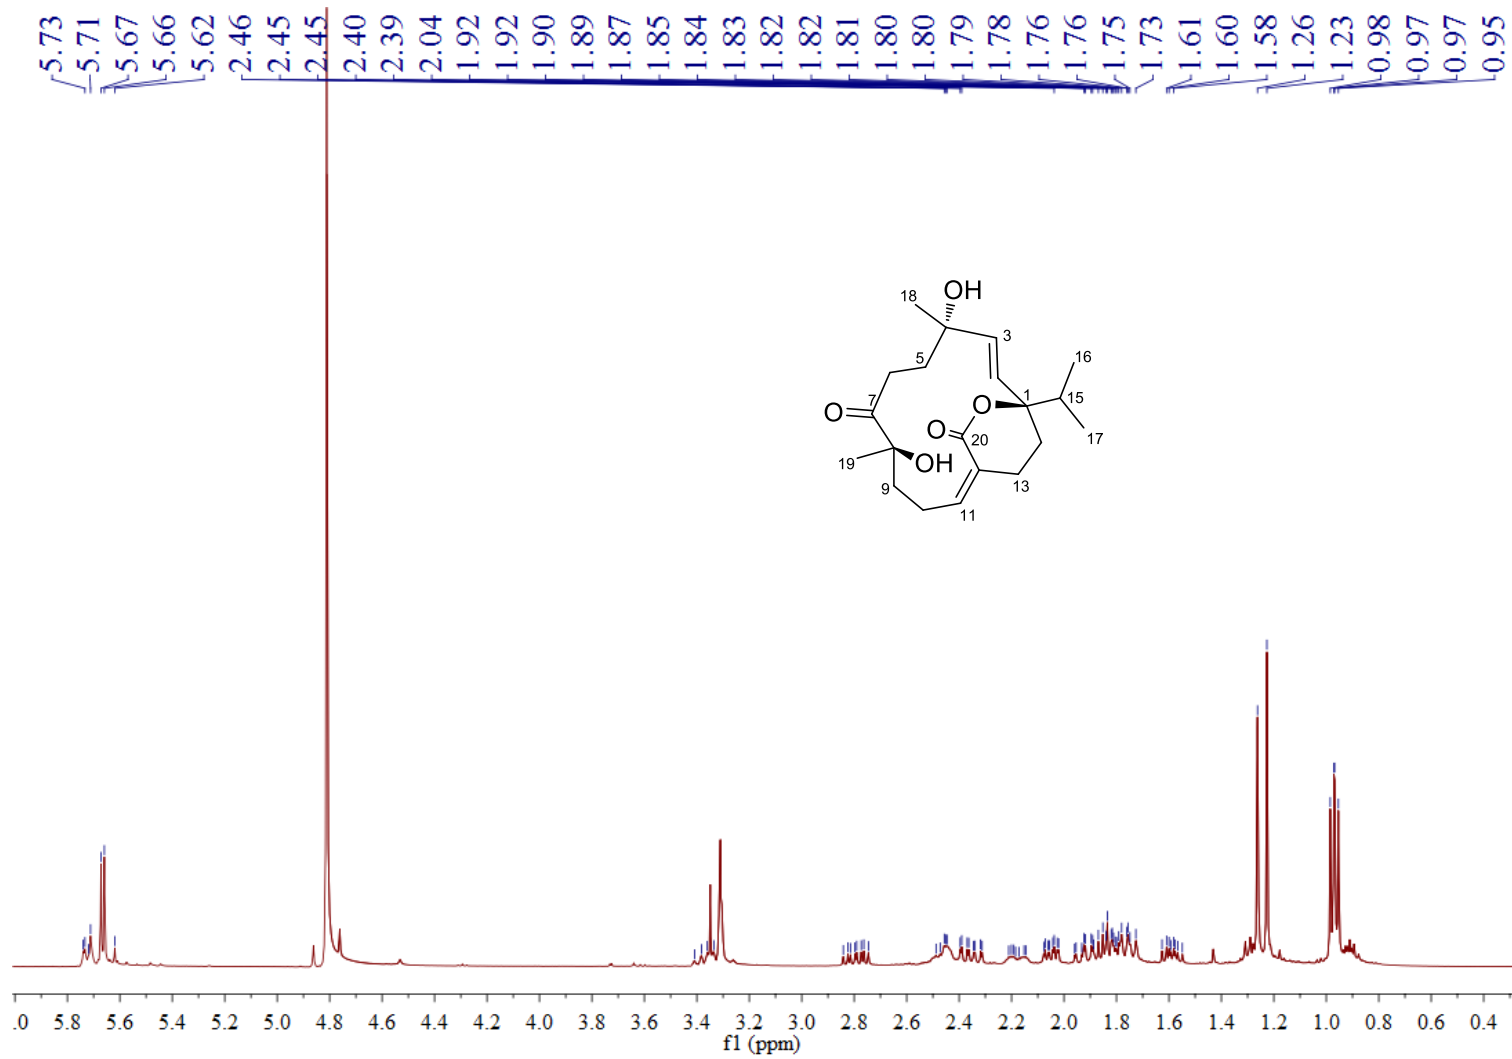

S30  $^{13}\text{C}$  NMR spectrum of **5** in Methanol- $d_4$

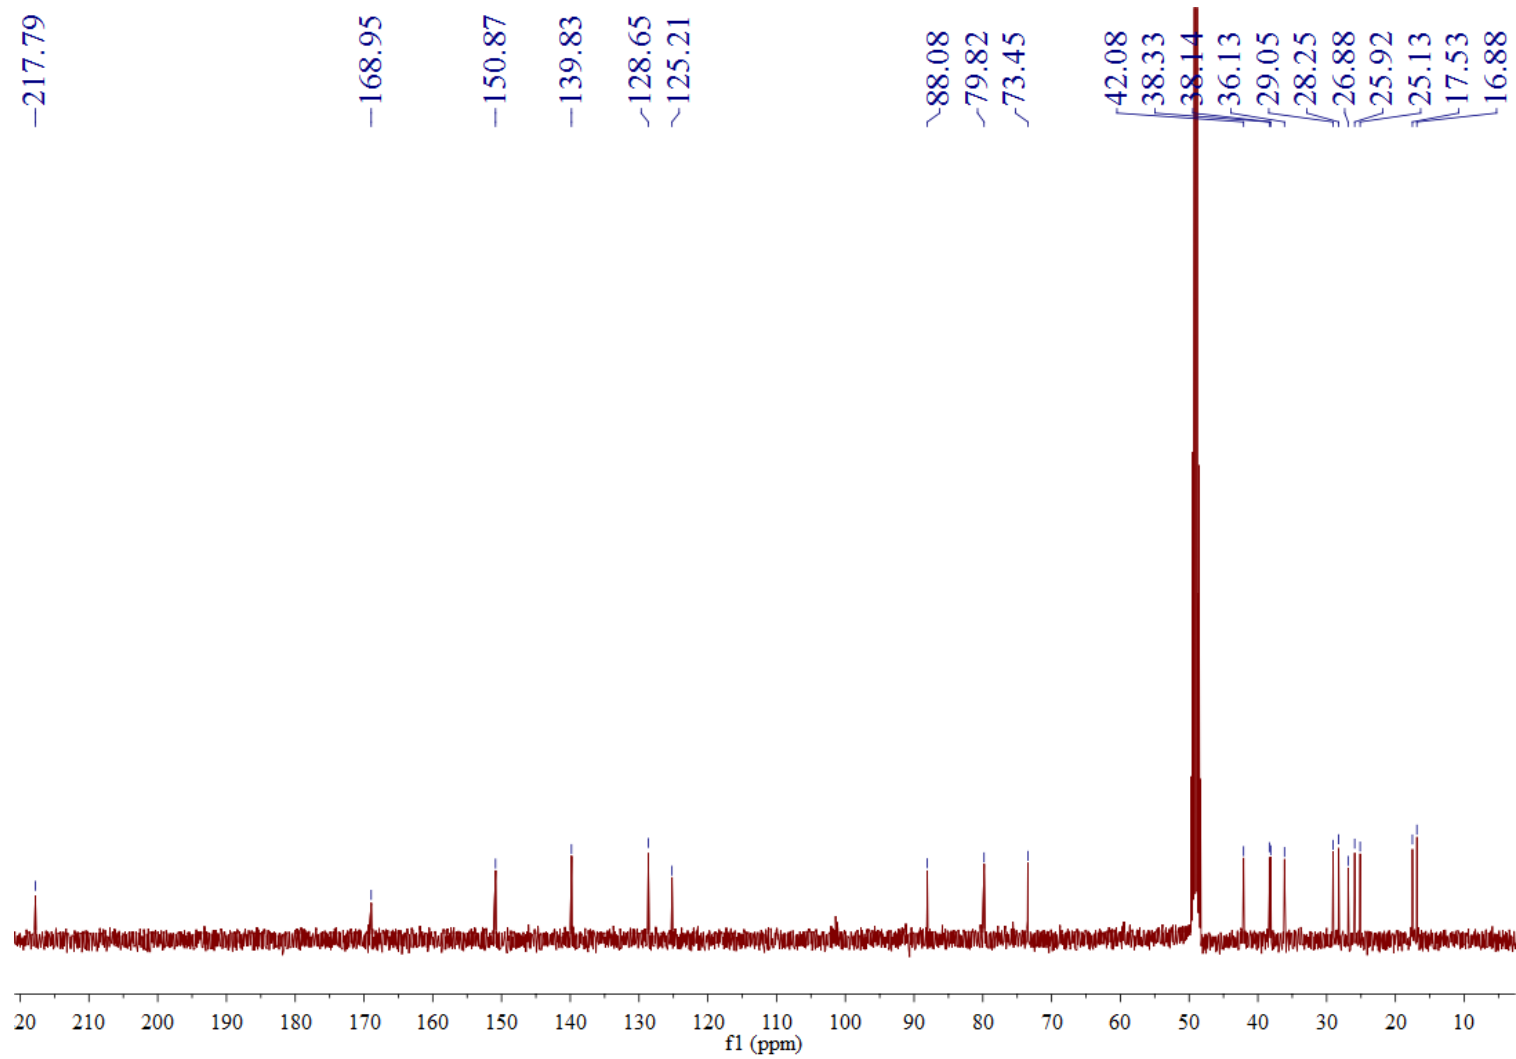

S31 HSQC spectrum of **5** in Methanol- $d_4$

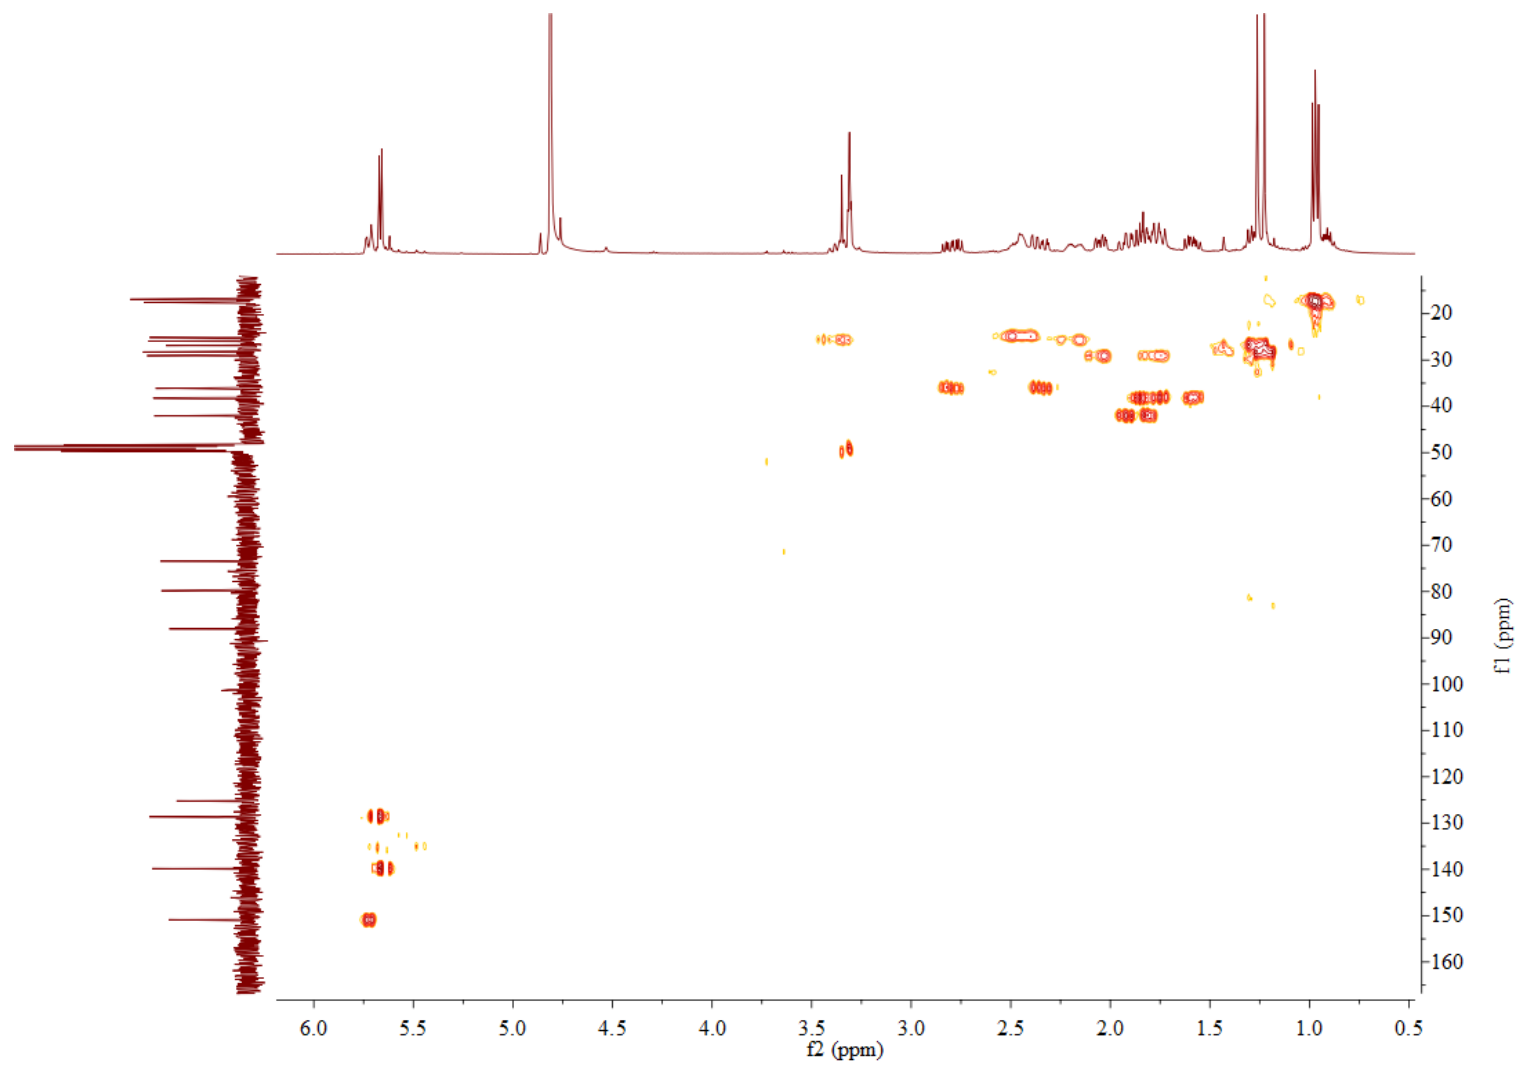

S32 HMBC spectrum of **5** in Methanol- $d_4$

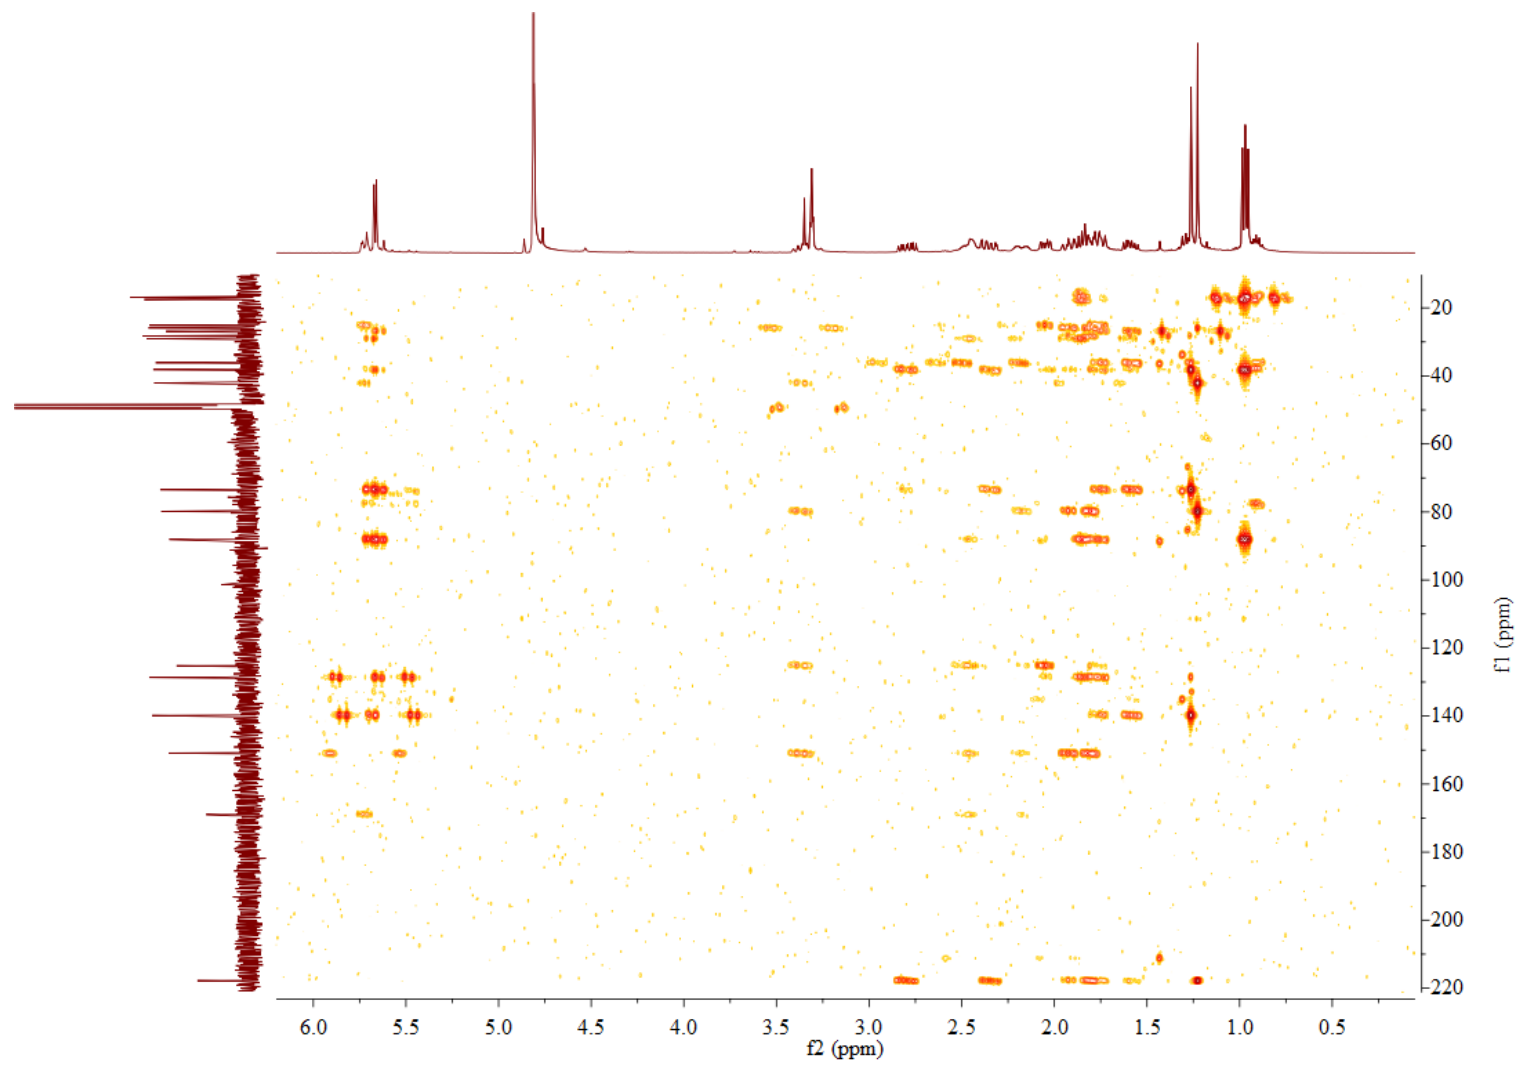

S33  $^1\text{H}$ - $^1\text{H}$  COSY spectrum of **5** in Methanol- $d_4$

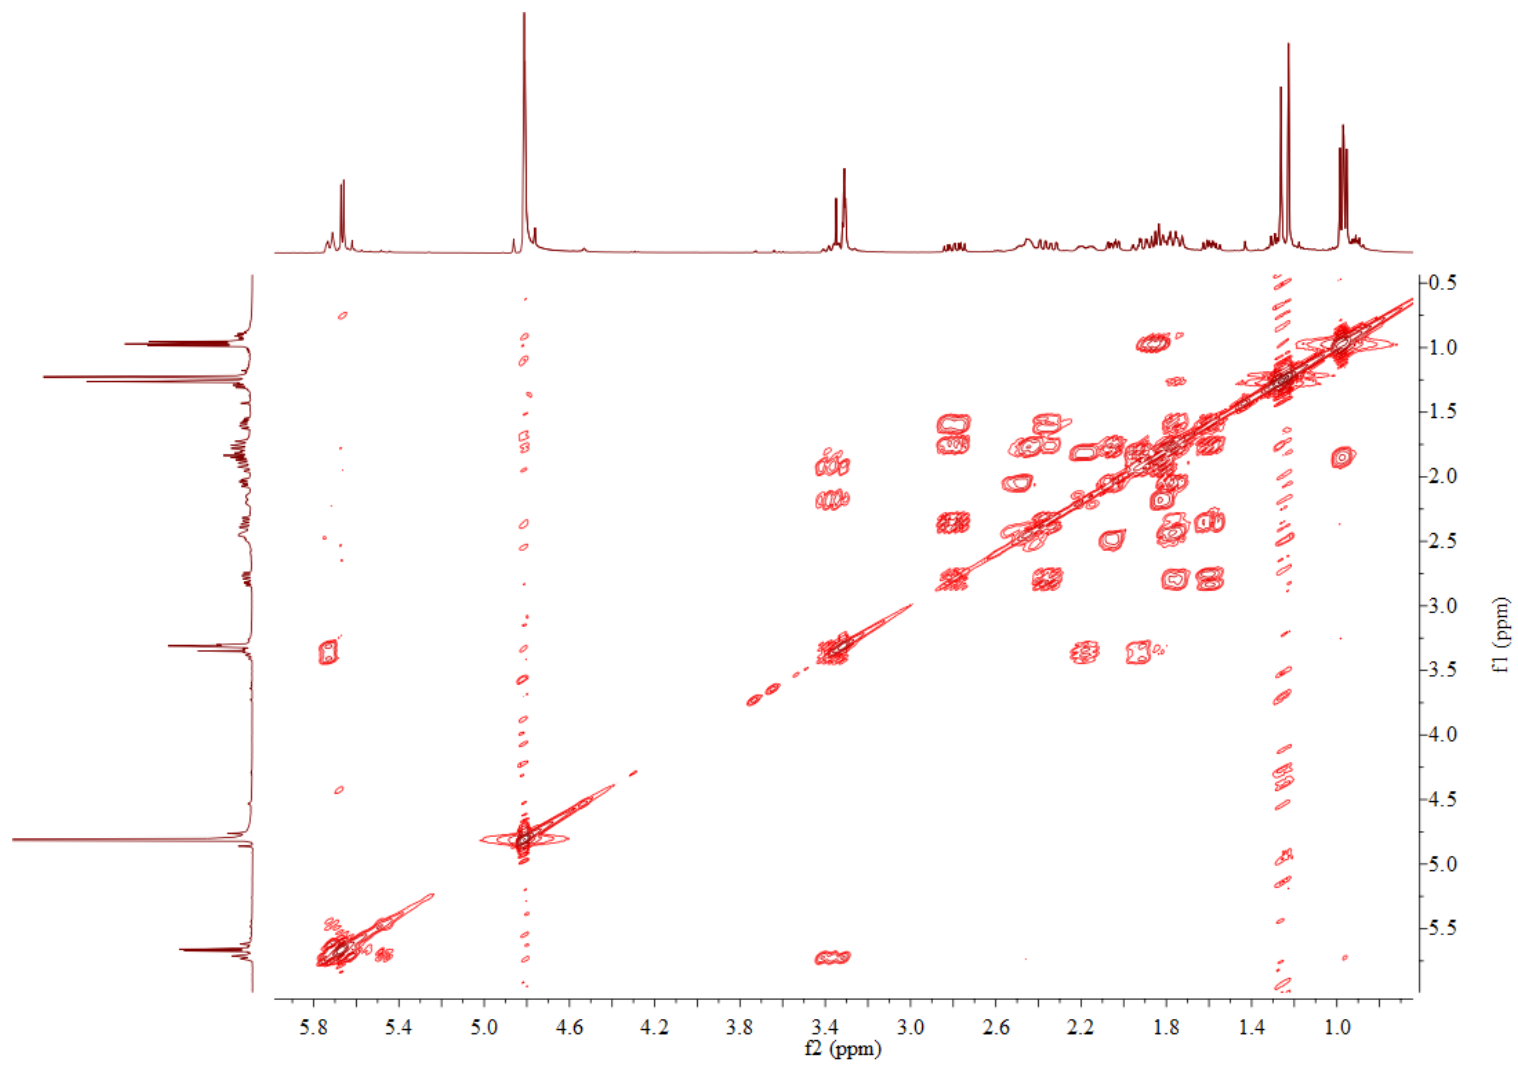

S34 NOESY spectrum of **5** in Methanol- $d_4$

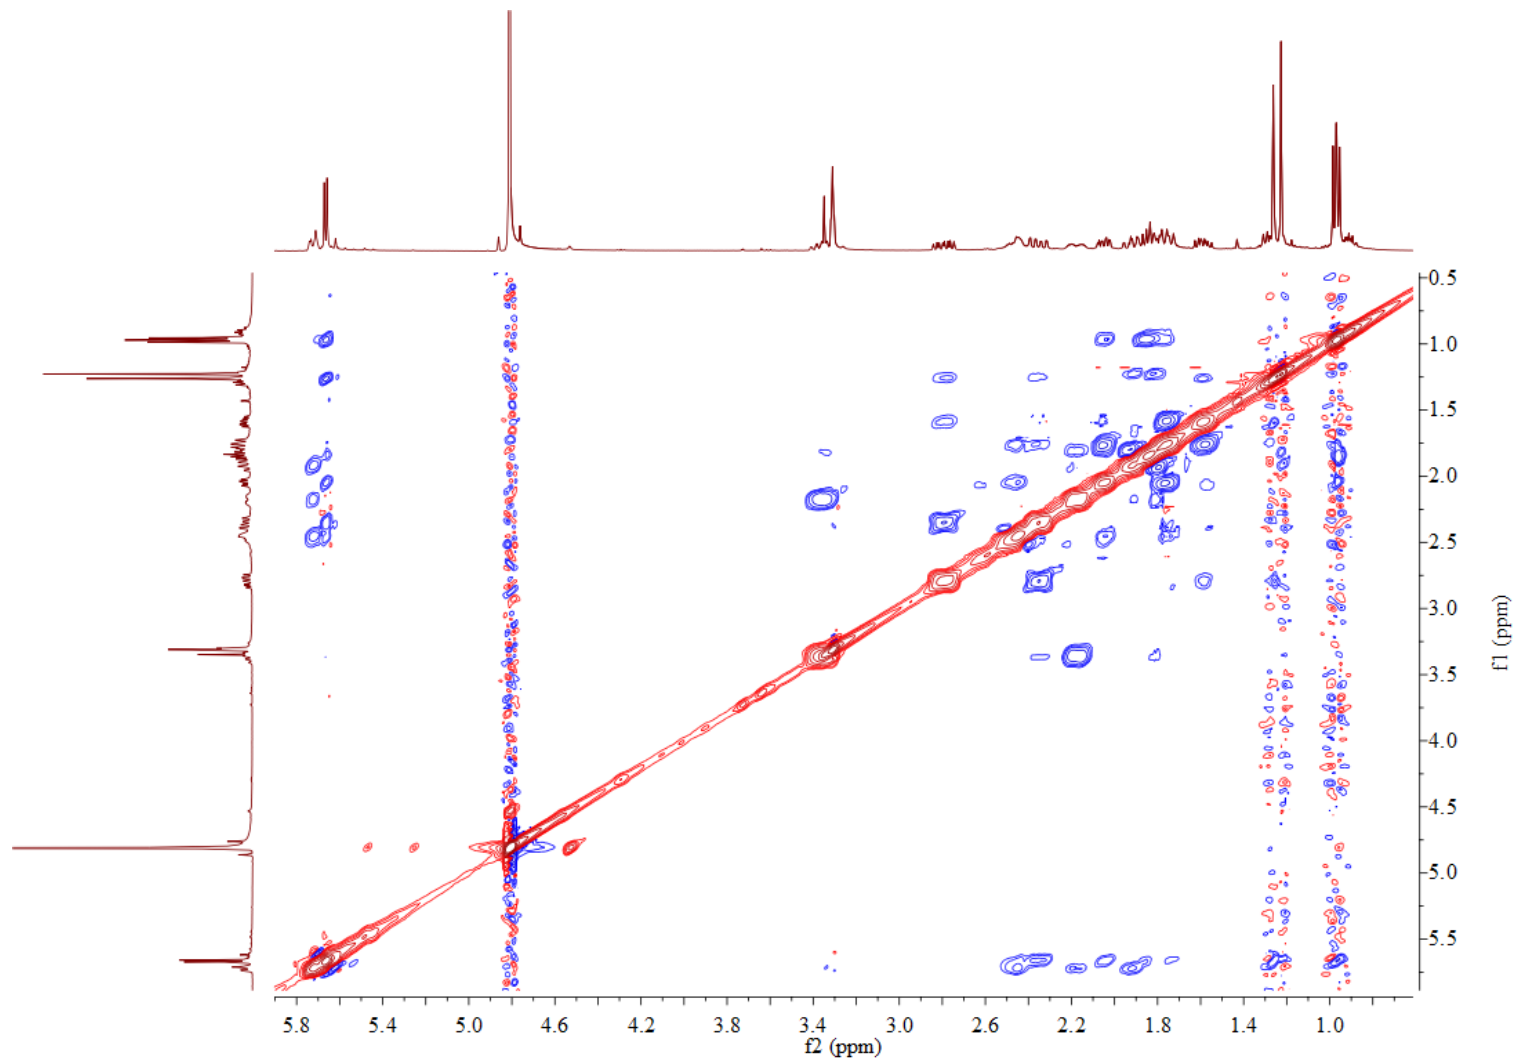

S35 HRESIMS spectrum of **5**

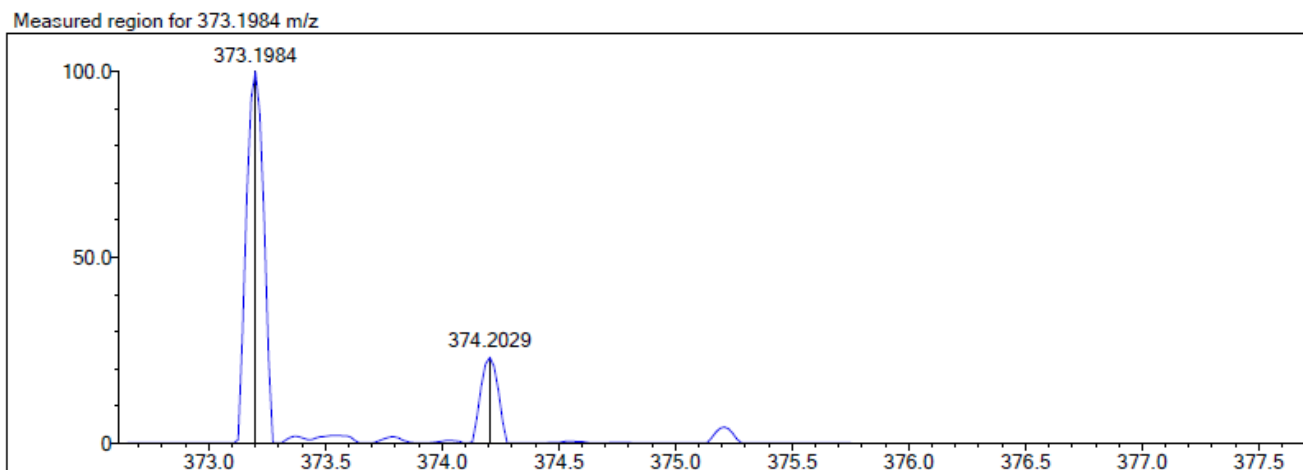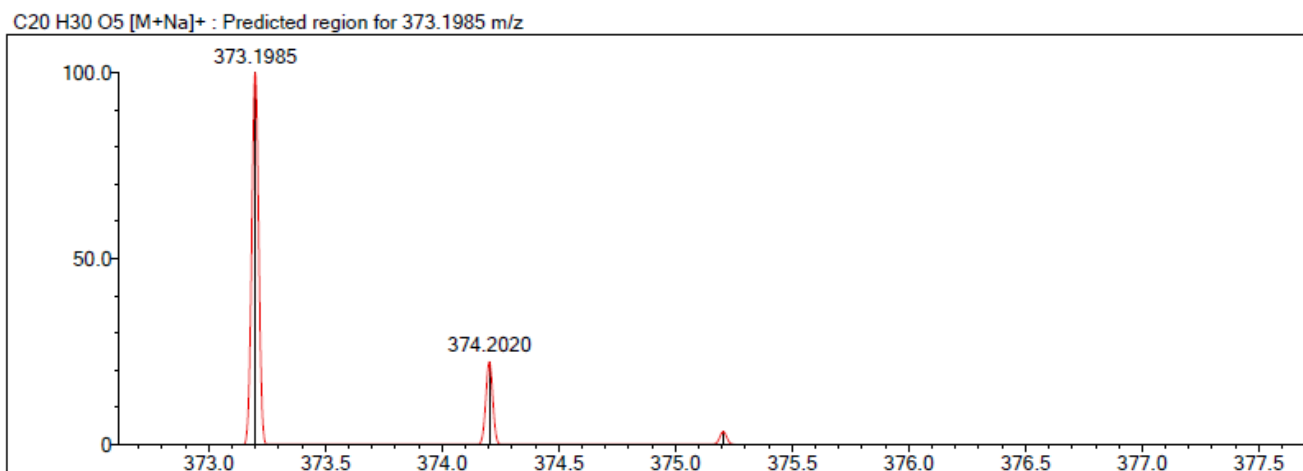

| Rank | Score | Formula (M)                                    | Ion                 | Meas. m/z | Pred. m/z | Df. (mDa) | Df. (ppm) | Iso   | DBE |
|------|-------|------------------------------------------------|---------------------|-----------|-----------|-----------|-----------|-------|-----|
| 1    | 87.48 | C <sub>20</sub> H <sub>30</sub> O <sub>5</sub> | [M+Na] <sup>+</sup> | 373.1984  | 373.1985  | -0.1      | -0.27     | 87.48 | 6.0 |

S36 <sup>1</sup>H NMR spectrum of **6** in Methanol-*d*<sub>4</sub>

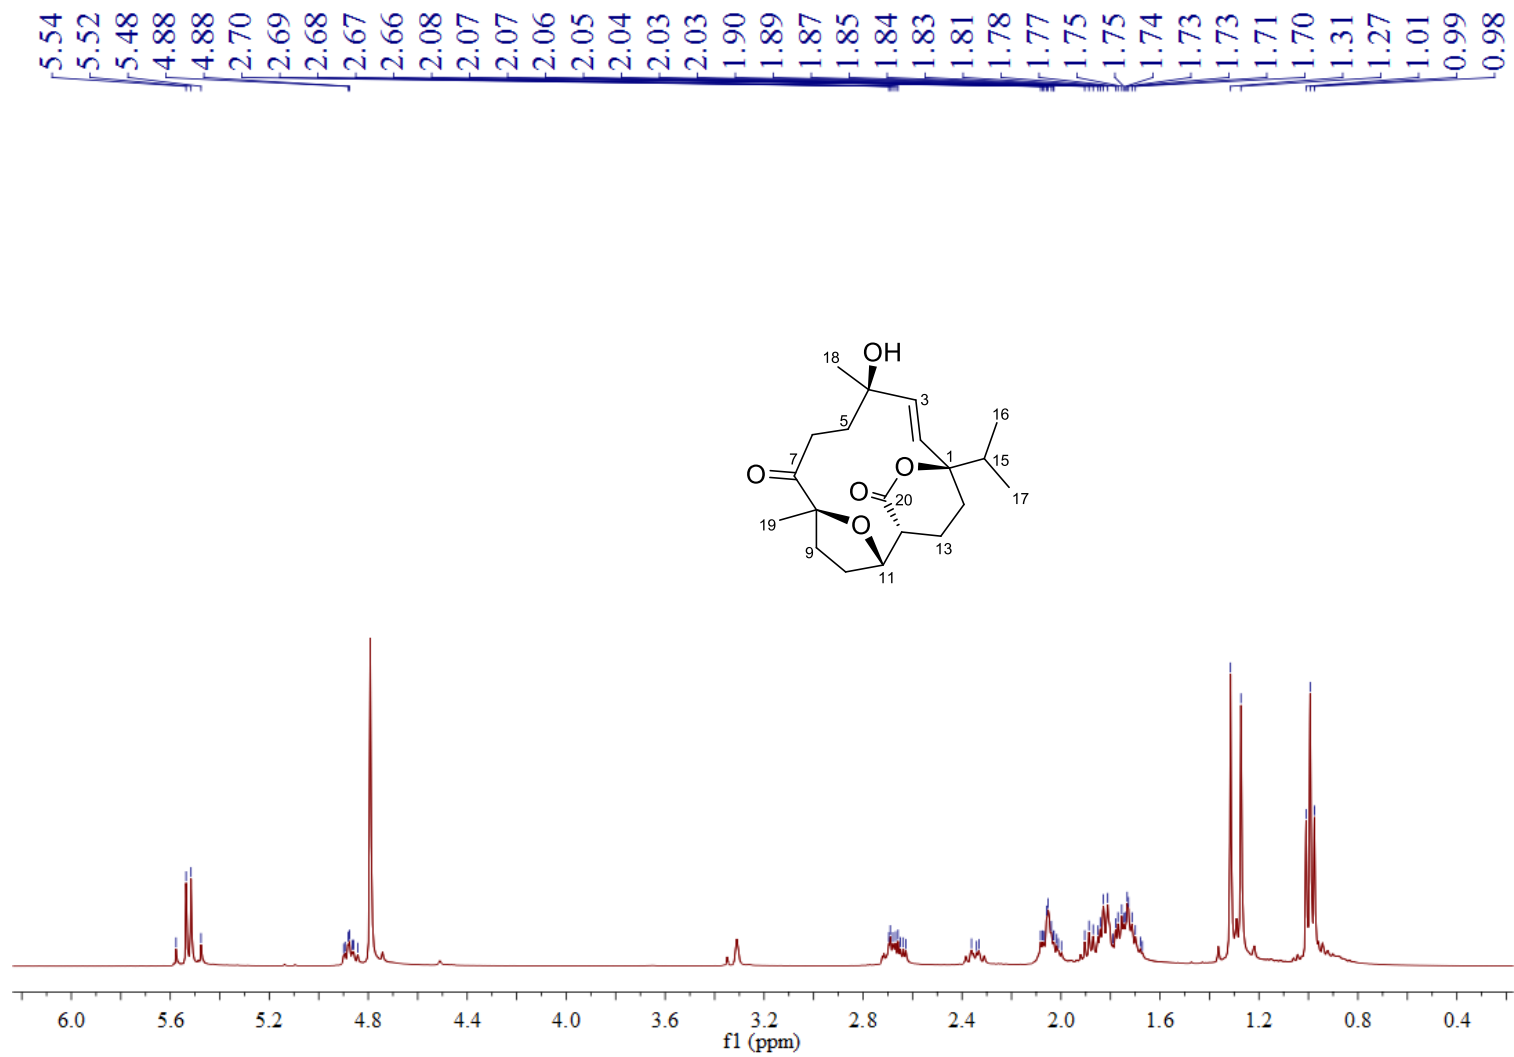



S37  $^{13}\text{C}$  NMR spectrum of **6** in Methanol- $d_4$

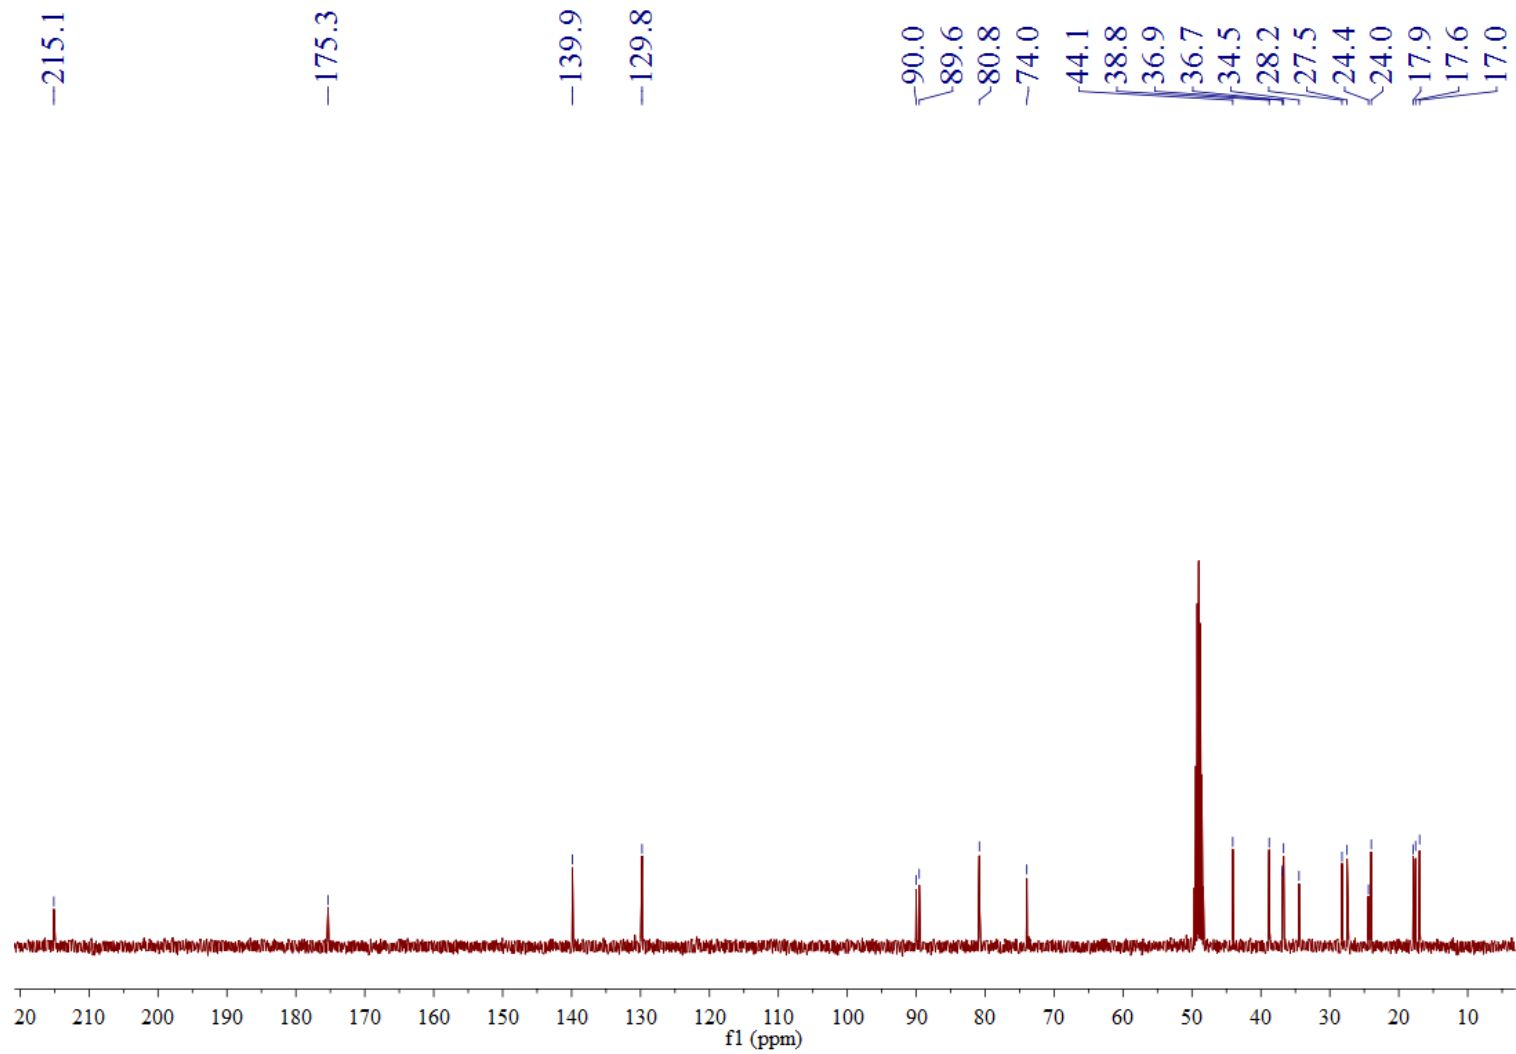

S38 HSQC spectrum of **6** in Methanol- $d_4$

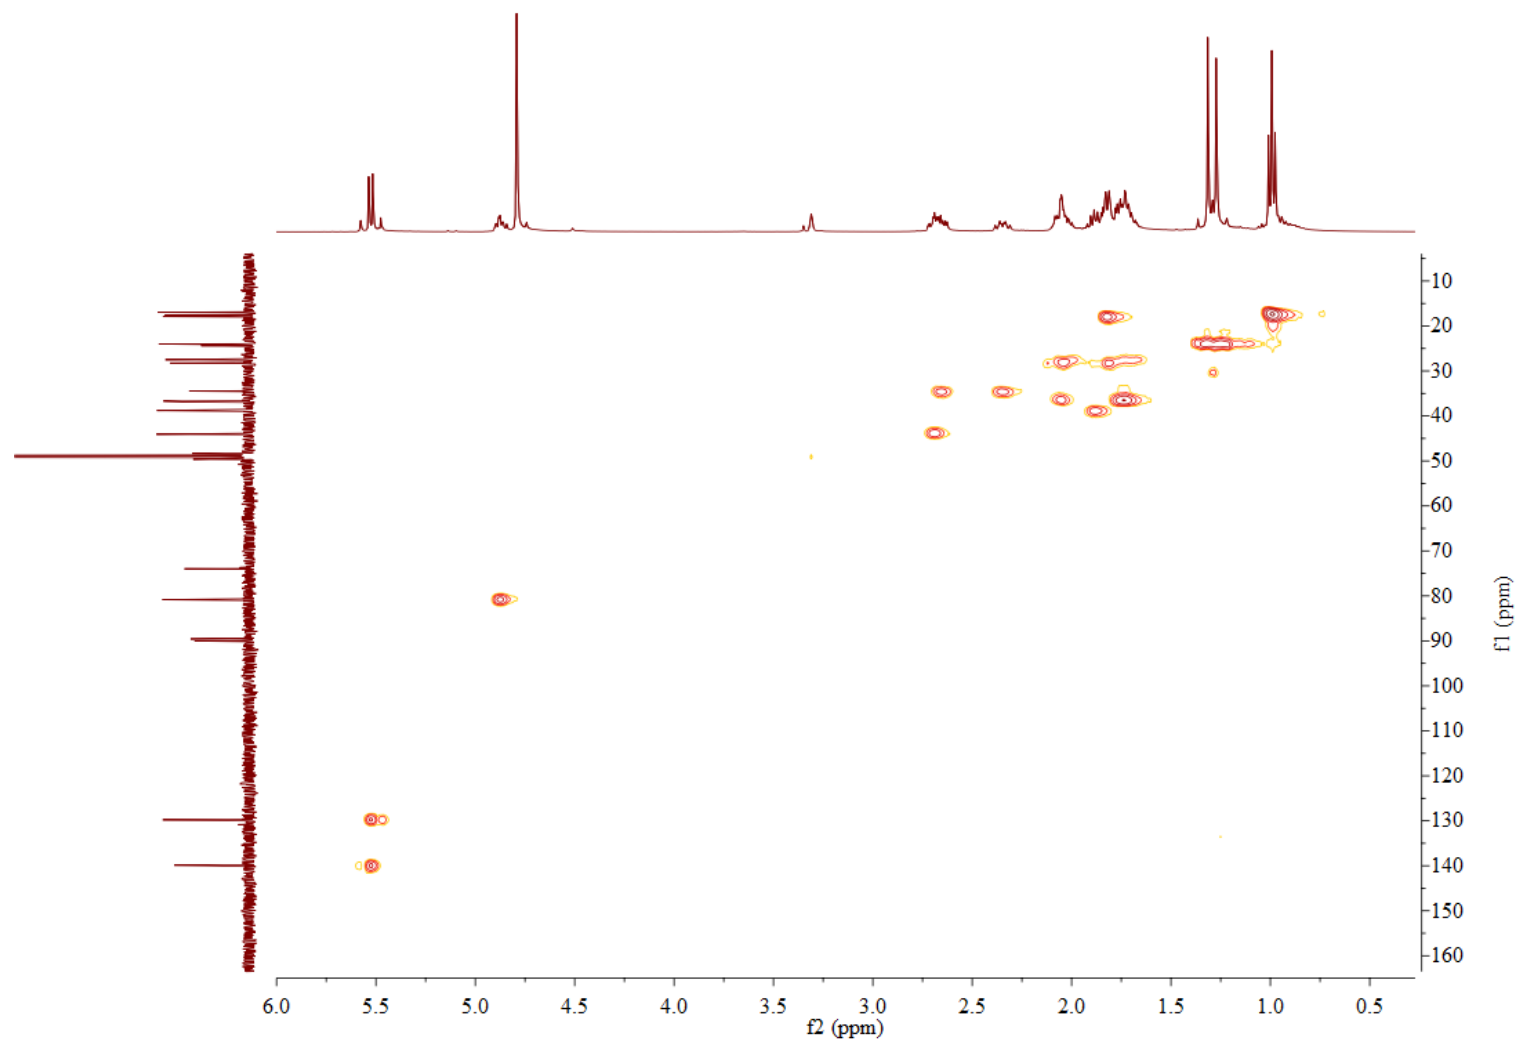

S39 HMBC spectrum of **6** in Methanol- $d_4$

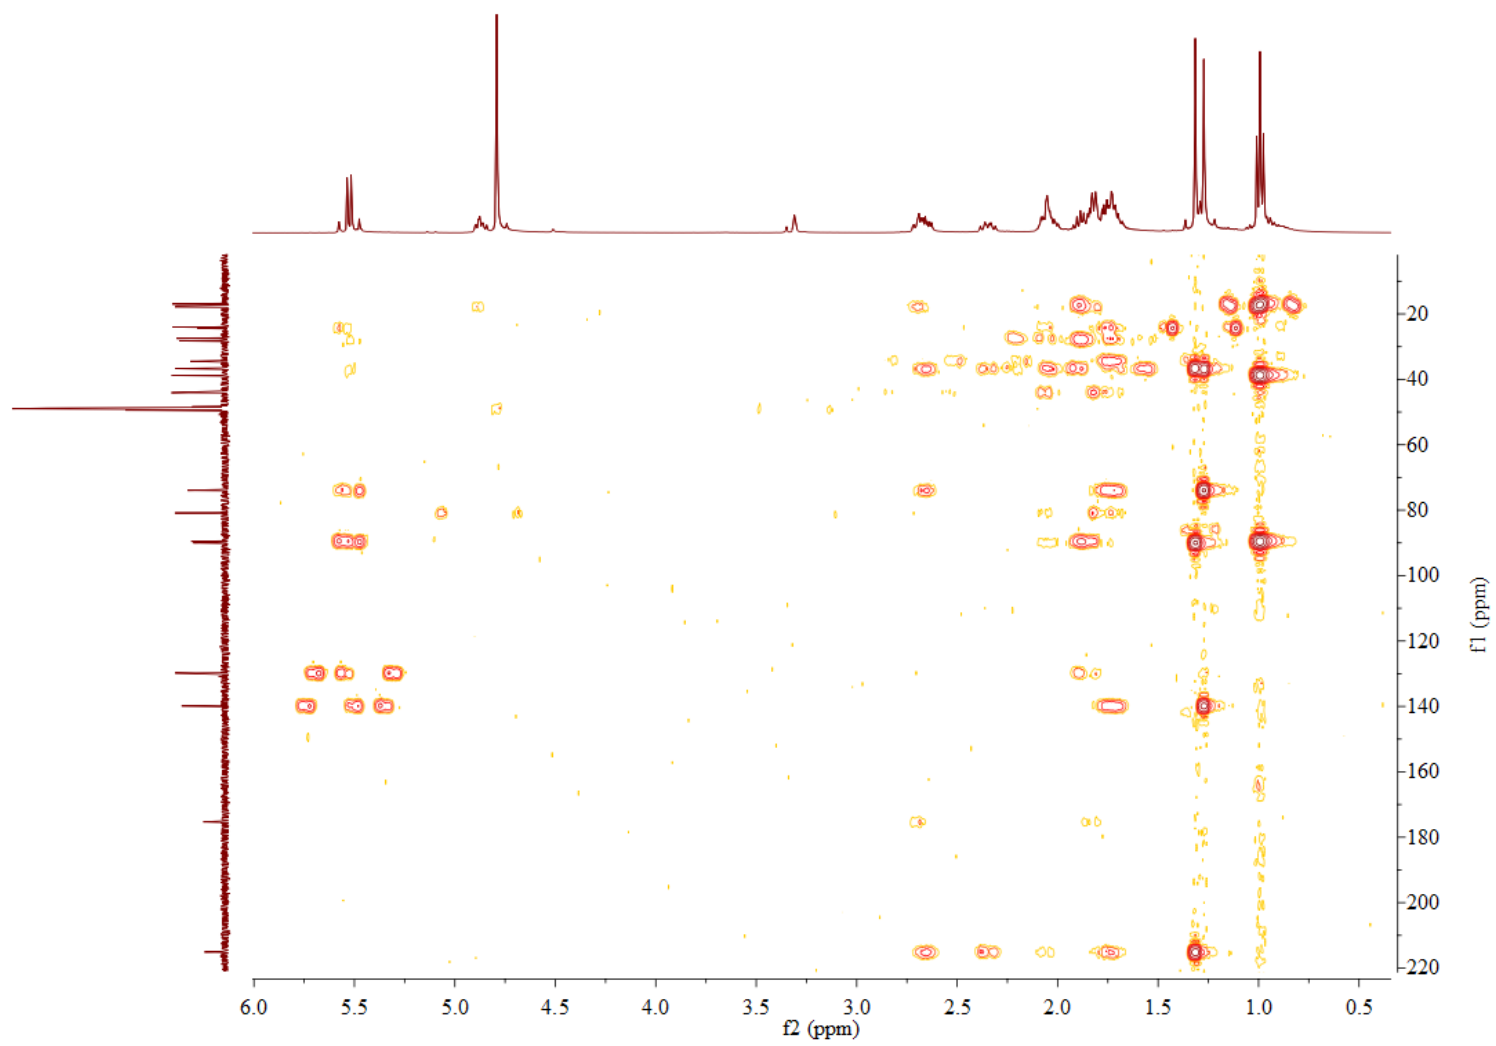

S40  $^1\text{H}$ - $^1\text{H}$  COSY spectrum of **6** in Methanol- $d_4$

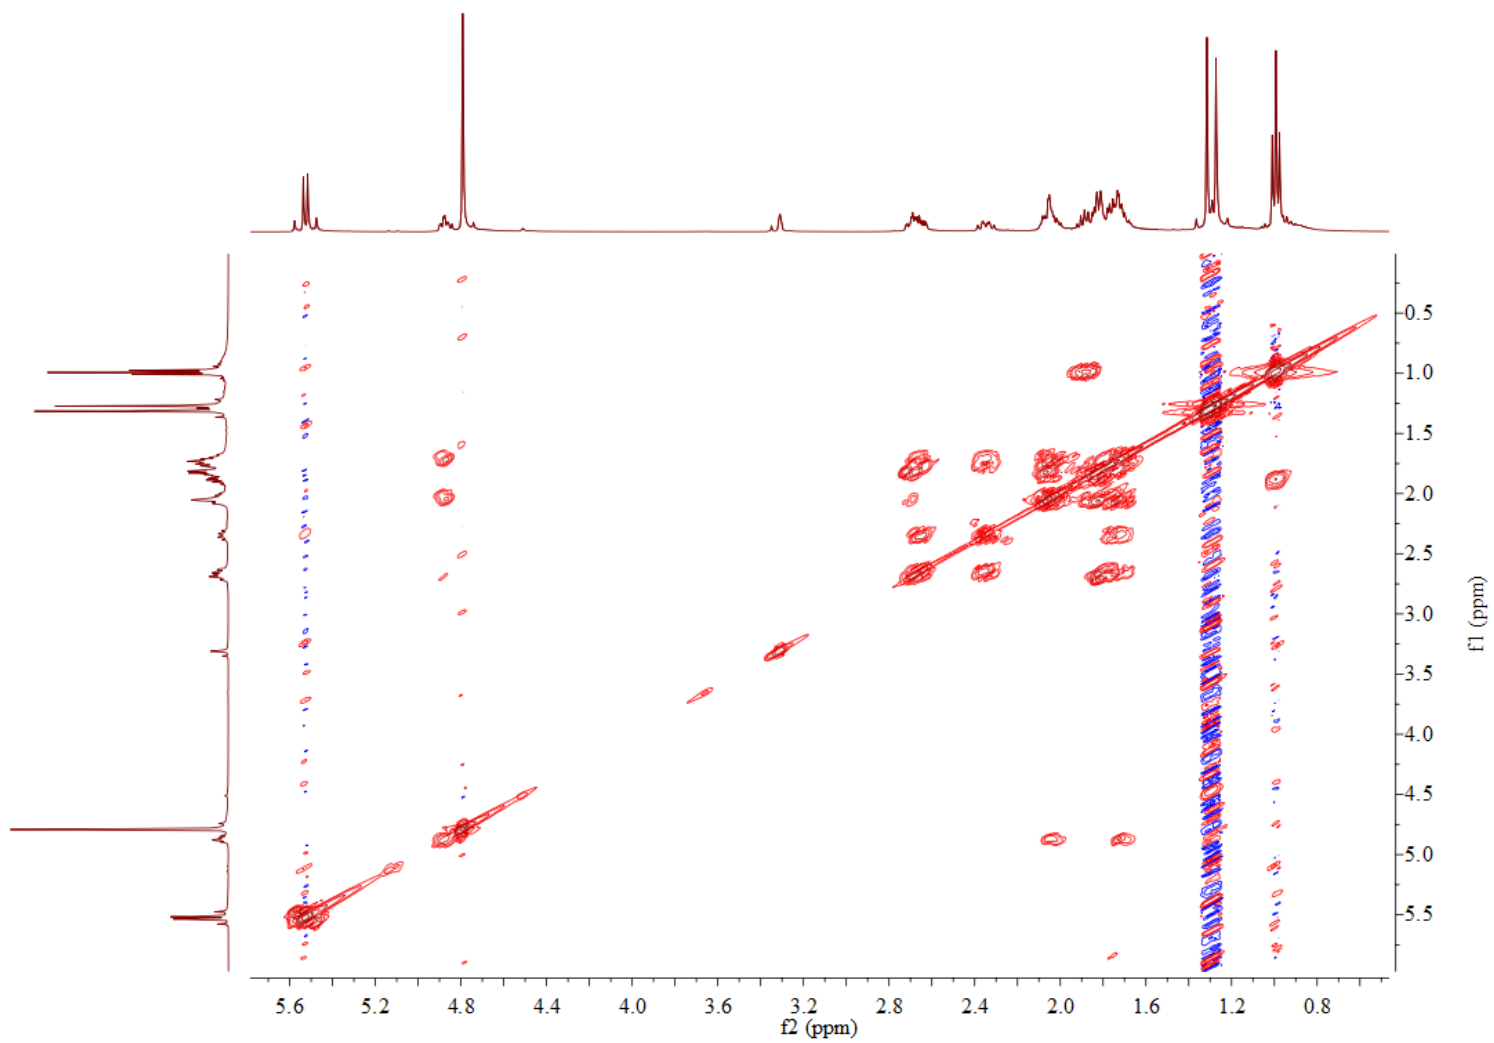

S41 NOESY spectrum of **6** in Methanol- $d_4$

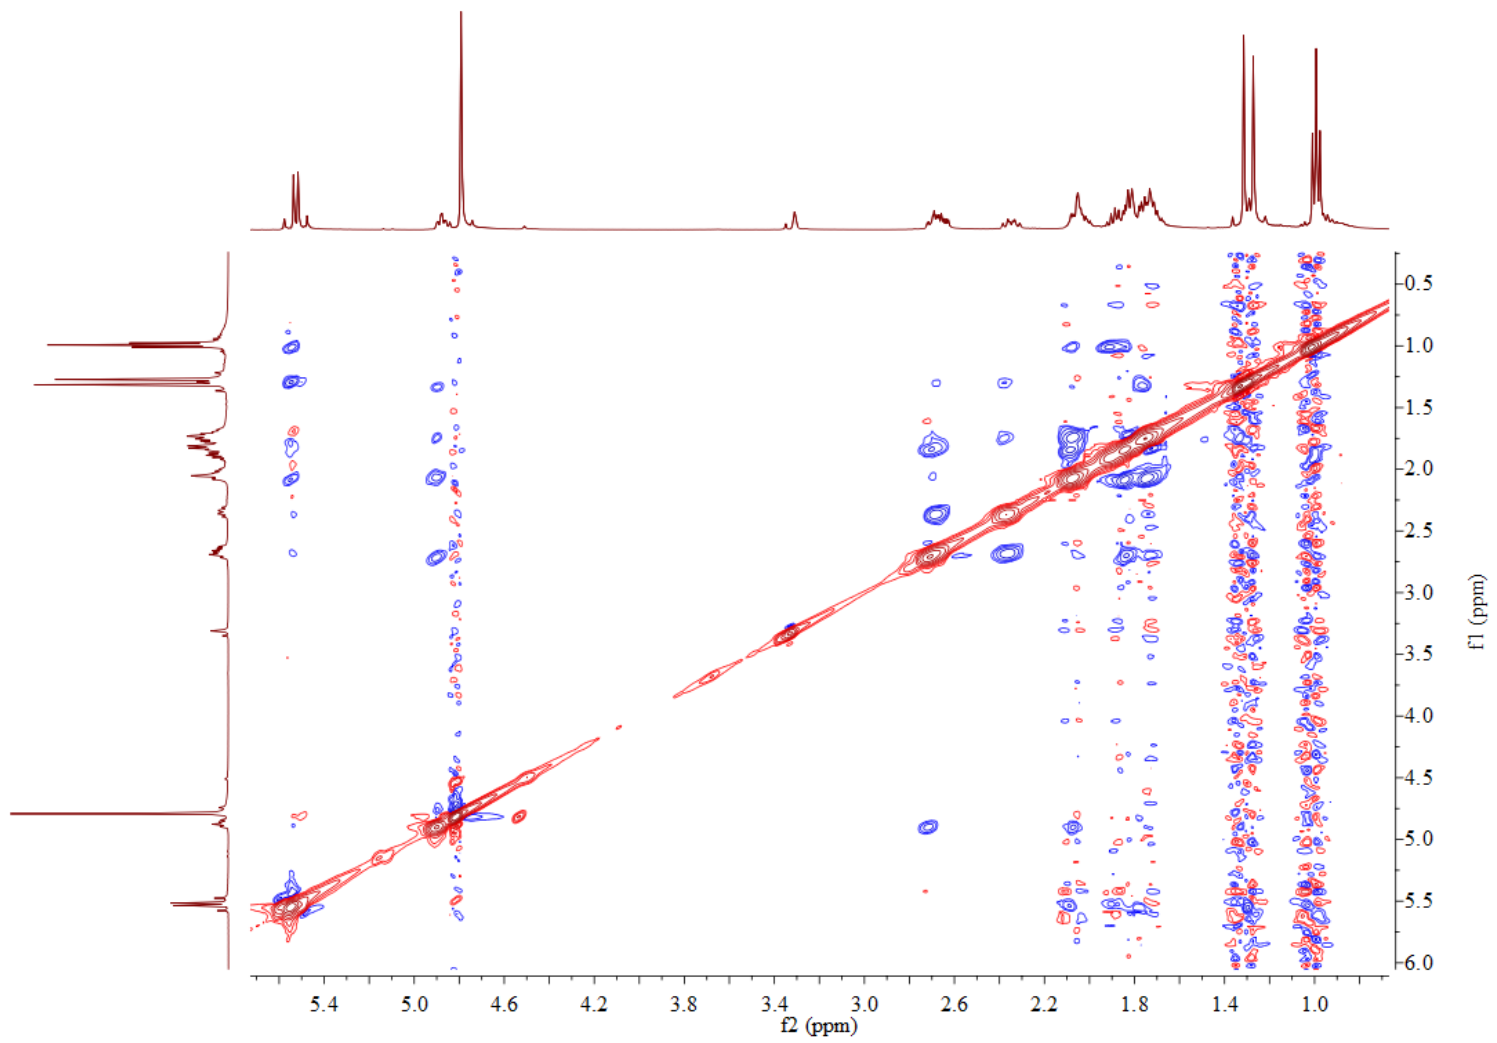

S42 HRESIMS spectrum of **6**

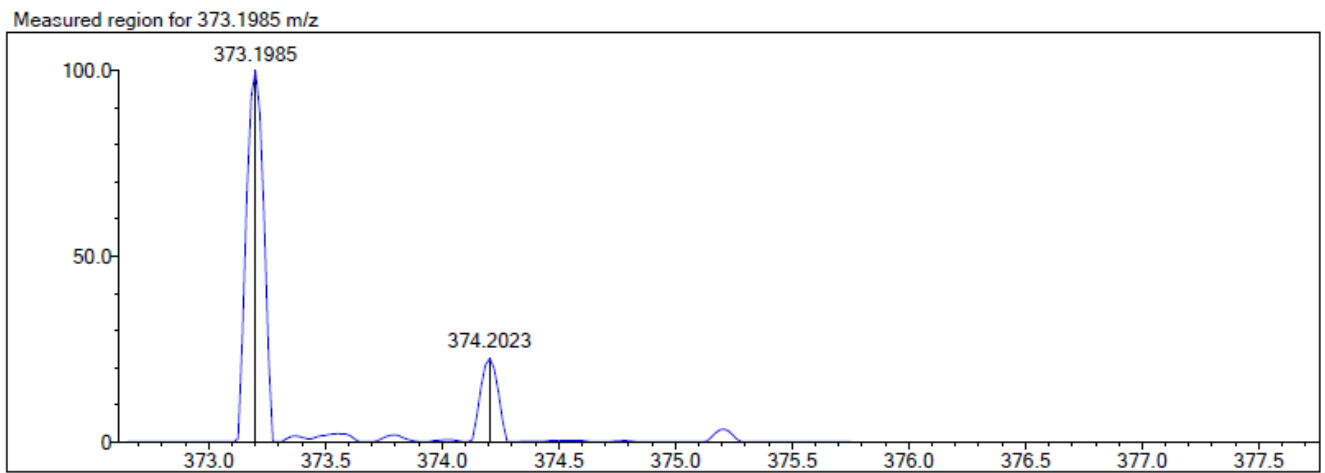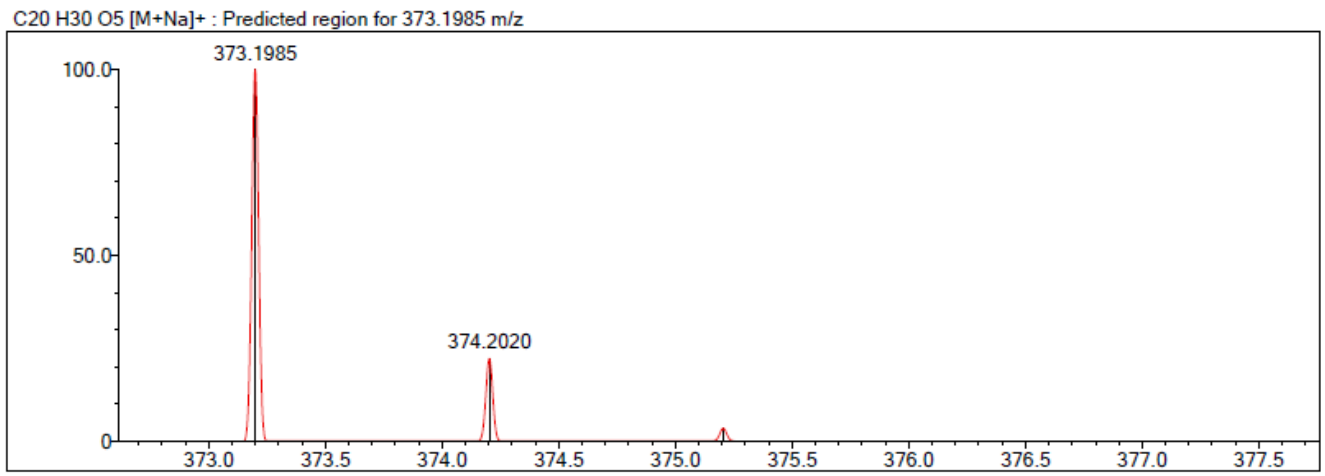

| Rank | Score | Formula (M)                                    | Ion                 | Meas. m/z | Pred. m/z | Df. (mDa) | Df. (ppm) | Iso   | DBE |
|------|-------|------------------------------------------------|---------------------|-----------|-----------|-----------|-----------|-------|-----|
| 1    | 88.02 | C <sub>20</sub> H <sub>30</sub> O <sub>5</sub> | [M+Na] <sup>+</sup> | 373.1985  | 373.1985  | -0.0      | 0.00      | 88.02 | 6.0 |

S43 <sup>1</sup>H NMR spectrum of **7** in CDCl<sub>3</sub>

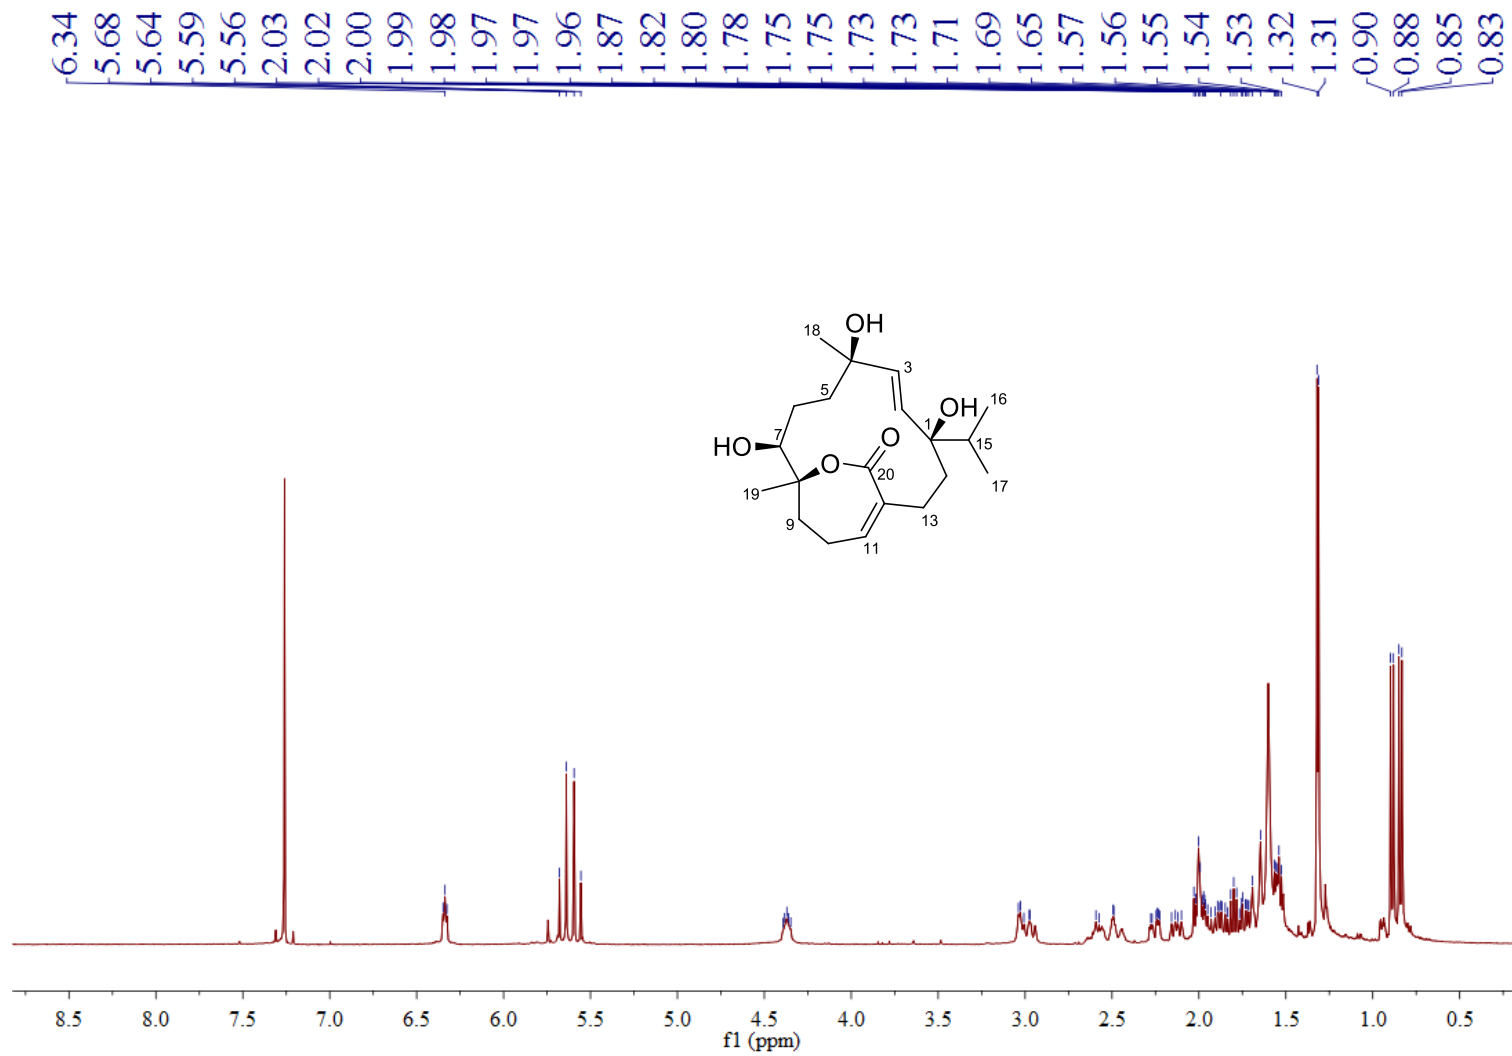

S44  $^{13}\text{C}$  NMR spectrum of **7** in  $\text{CDCl}_3$

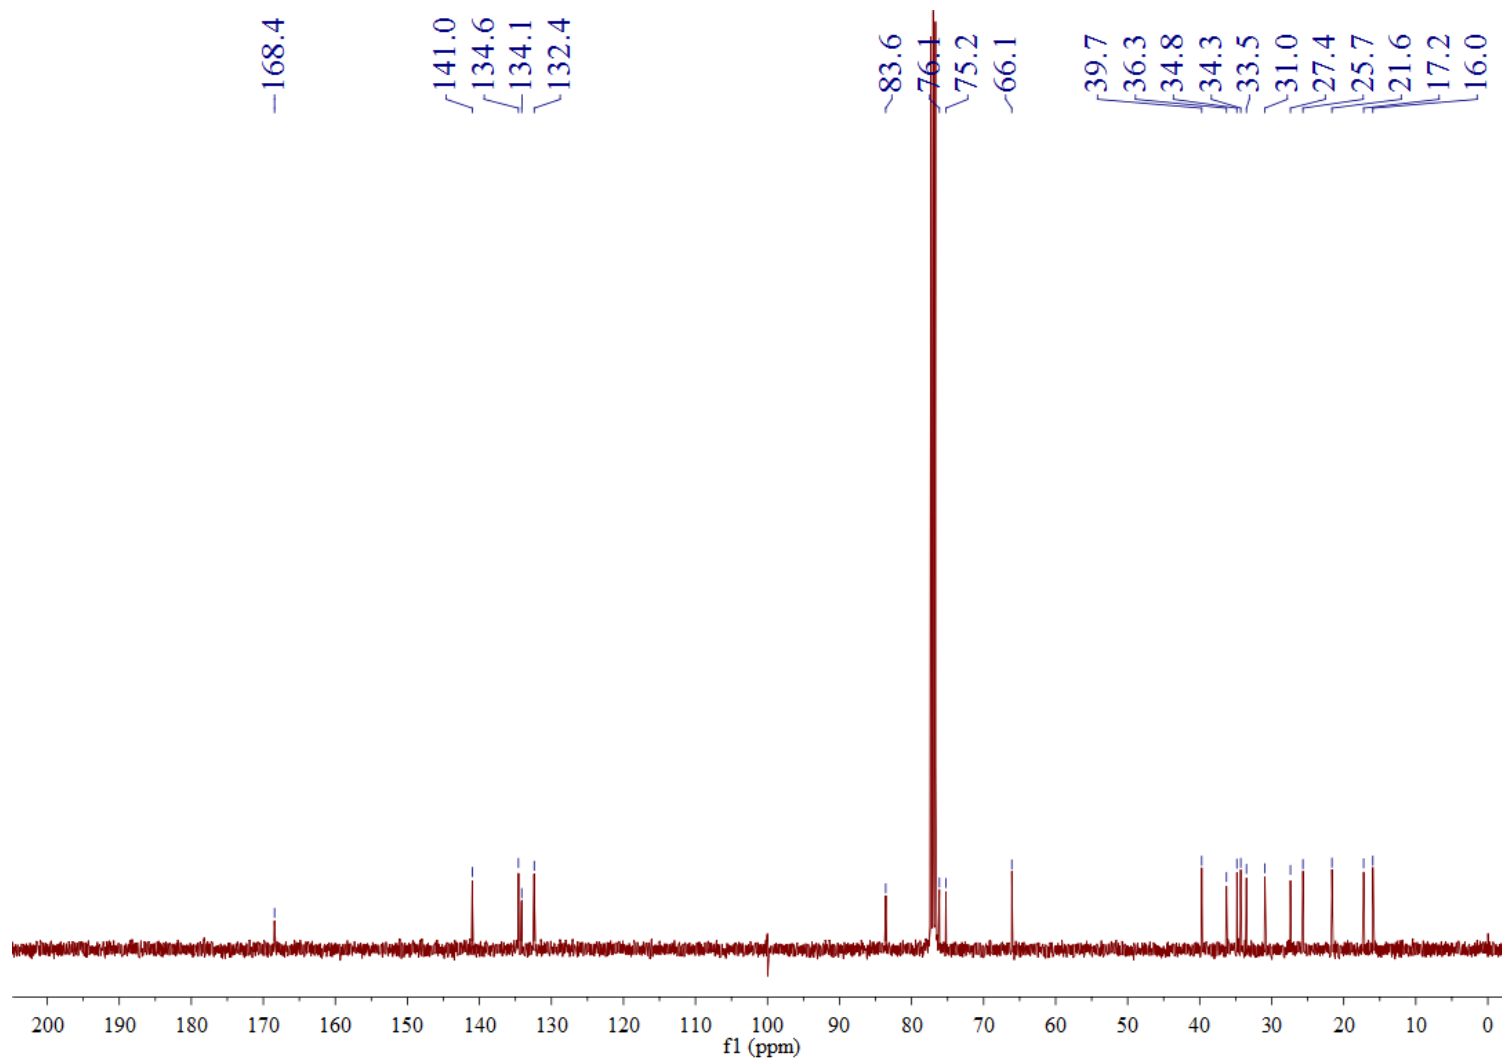



S45 HSQC spectrum of **7** in CDCl<sub>3</sub>

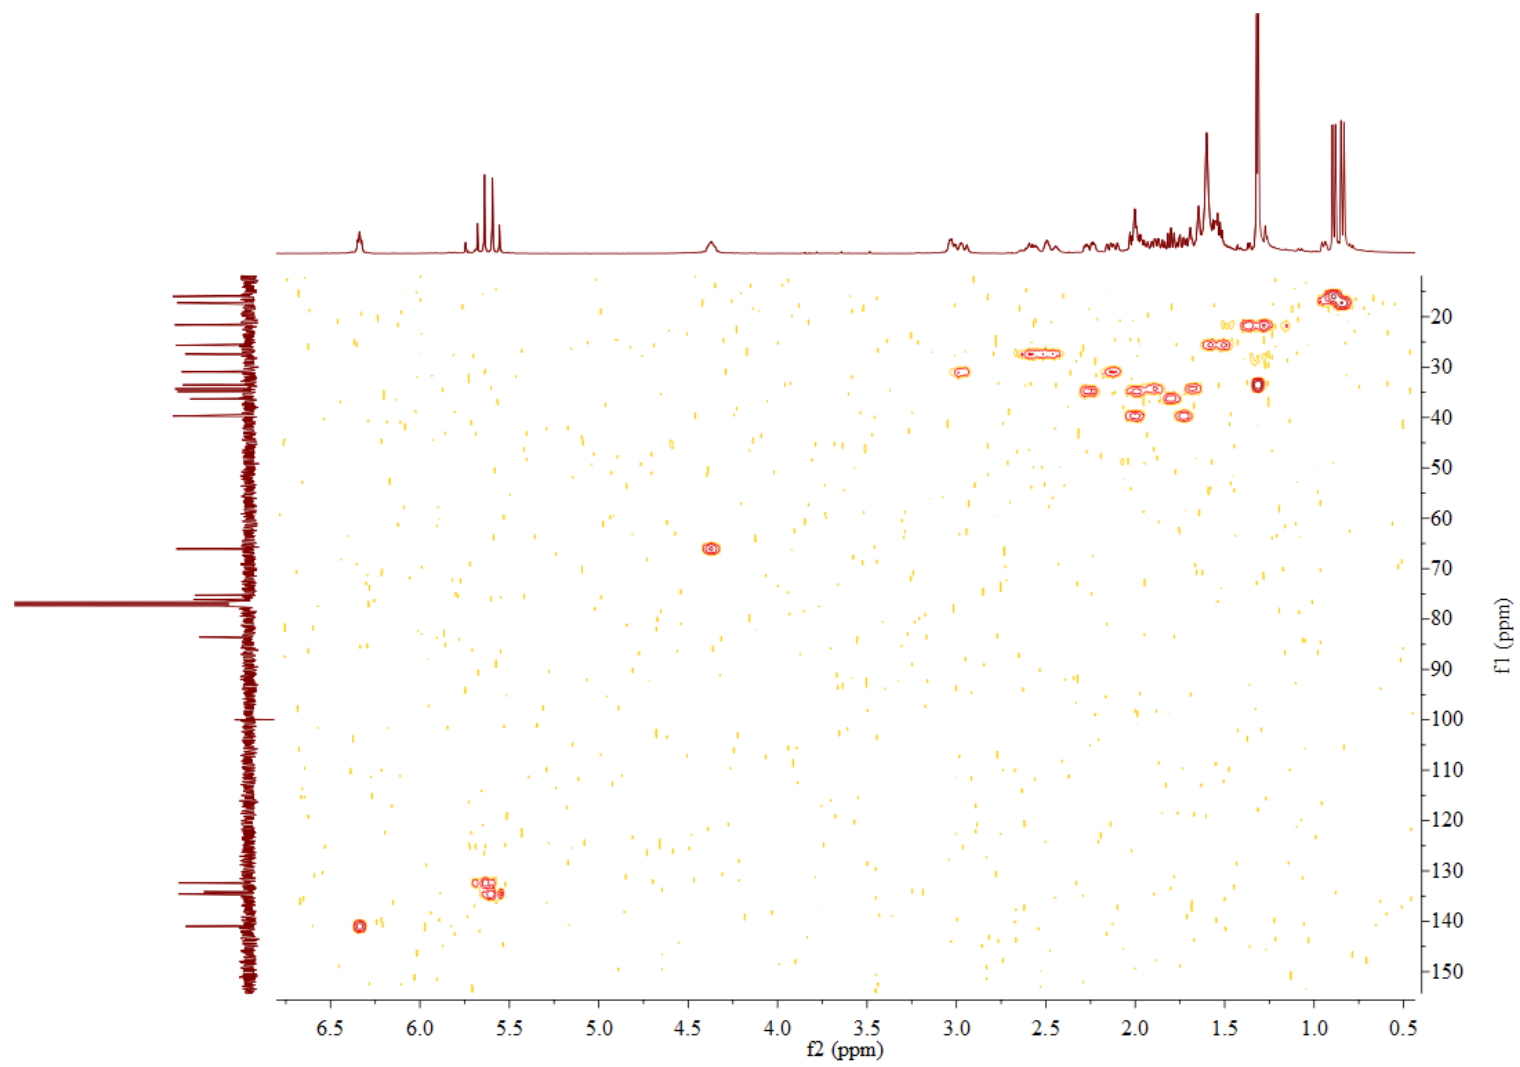

S46 HMBC spectrum of **7** in CDCl<sub>3</sub>

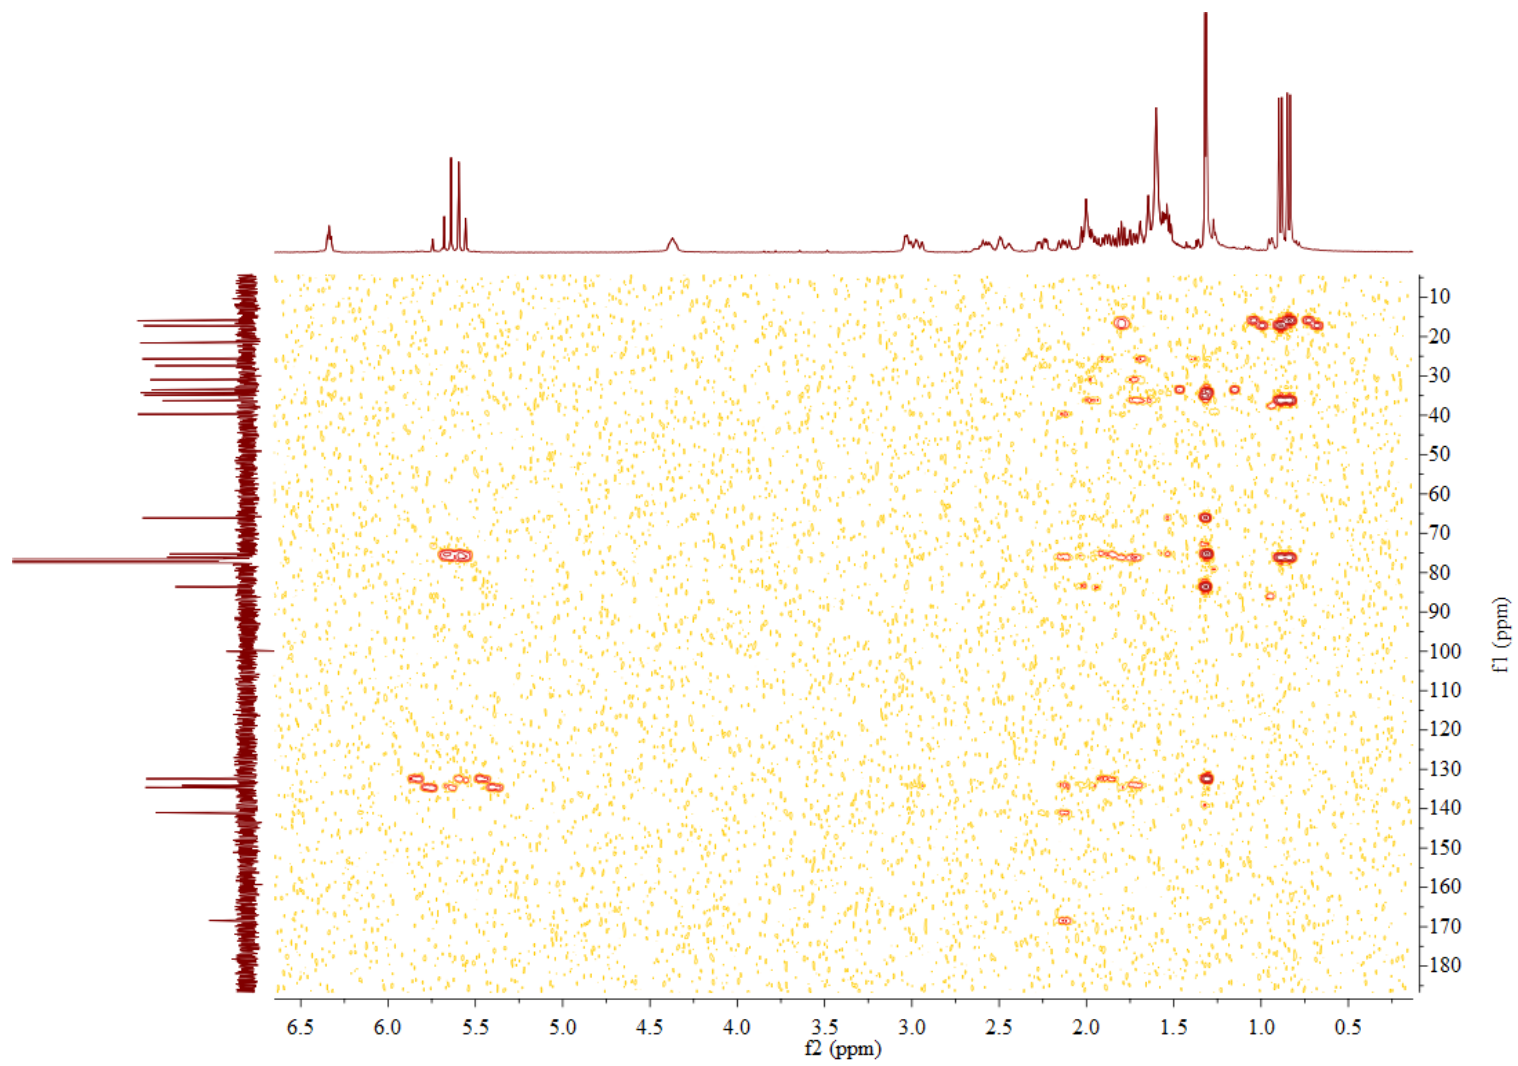

S47

$^1\text{H}$ - $^1\text{H}$  COSY spectrum of **7** in  $\text{CDCl}_3$

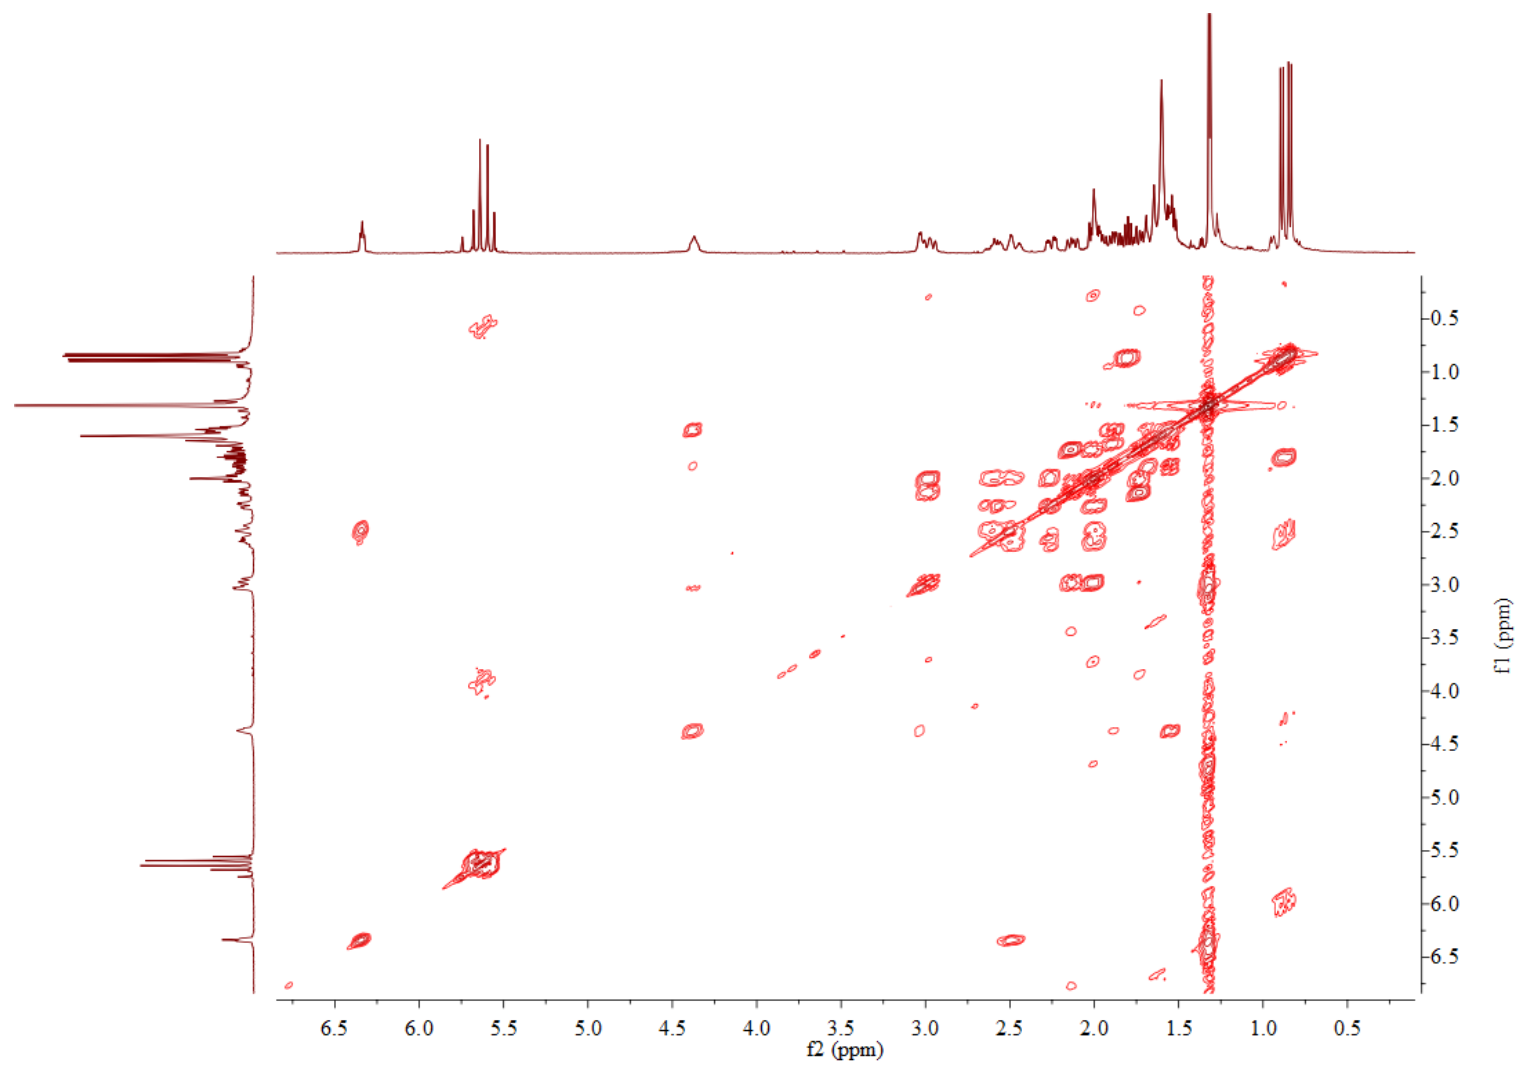

S48 NOESY spectrum of **7** in CDCl<sub>3</sub>

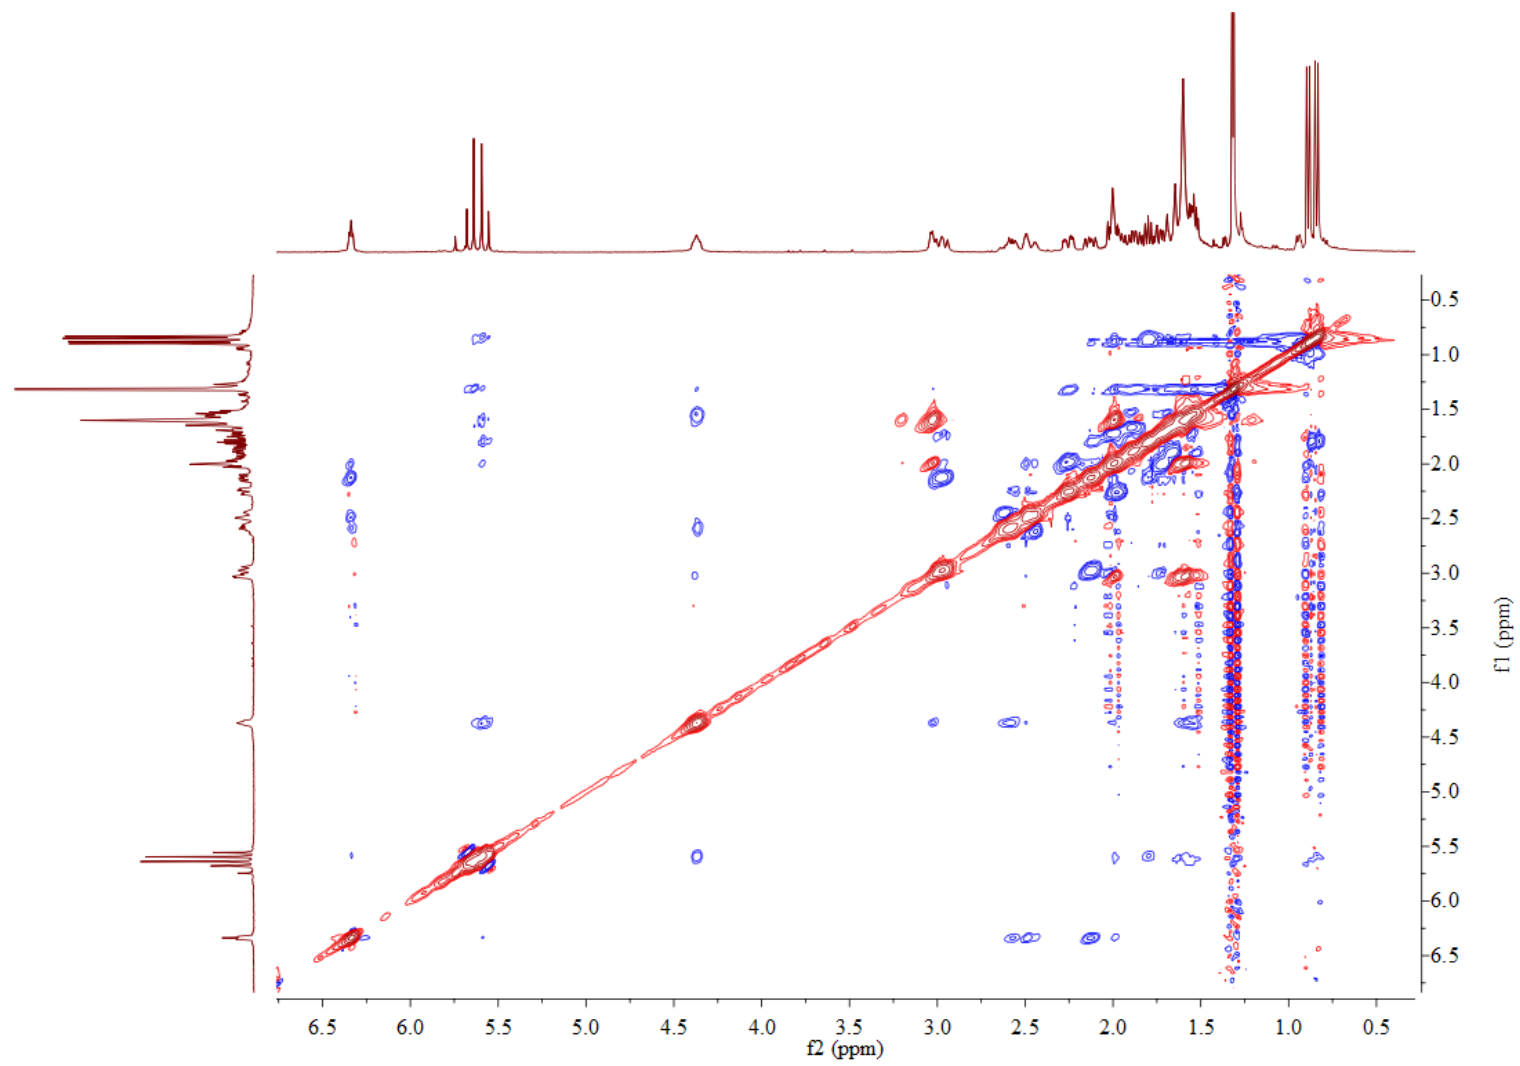

S49 HRESIMS spectrum of 7

Measured region for 375.2138 m/z

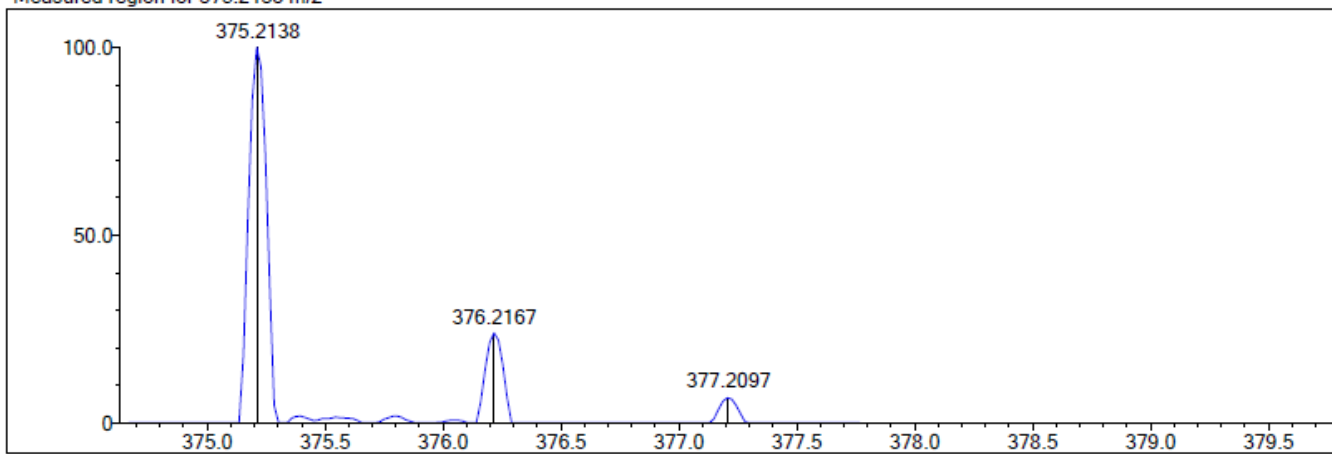

C20 H32 O5 [M+Na]+ : Predicted region for 375.2142 m/z

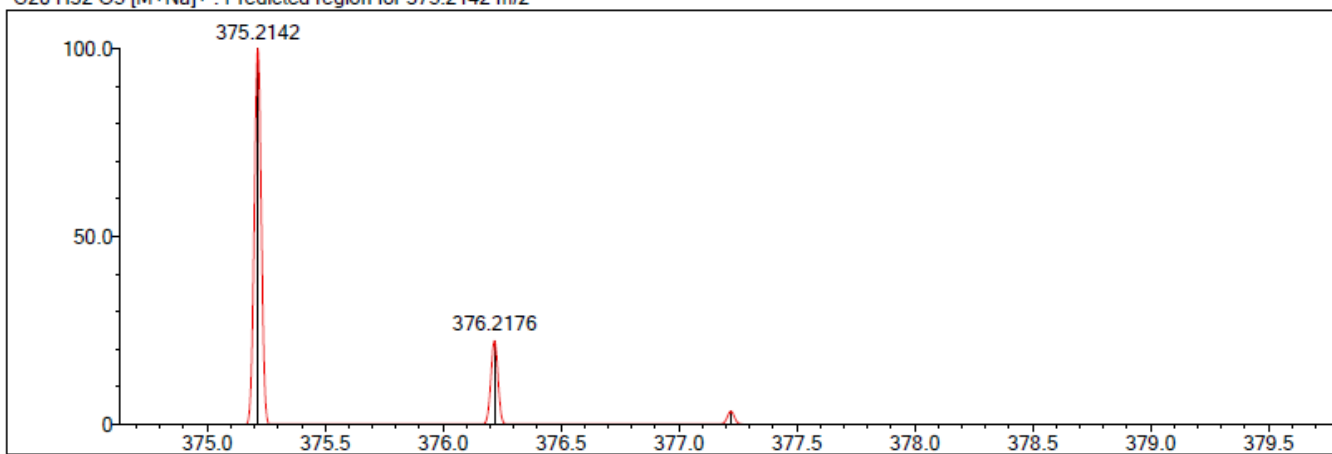

| Rank | Score | Formula (M) | Ion     | Meas. m/z | Pred. m/z | Df. (mDa) | Df. (ppm) | Iso   | DBE |
|------|-------|-------------|---------|-----------|-----------|-----------|-----------|-------|-----|
| 1    | 67.27 | C20 H32 O5  | [M+Na]+ | 375.2138  | 375.2142  | -0.4      | -1.07     | 67.38 | 5.0 |

S50  $^1\text{H}$  NMR spectrum of **8** in Methanol- $d_4$

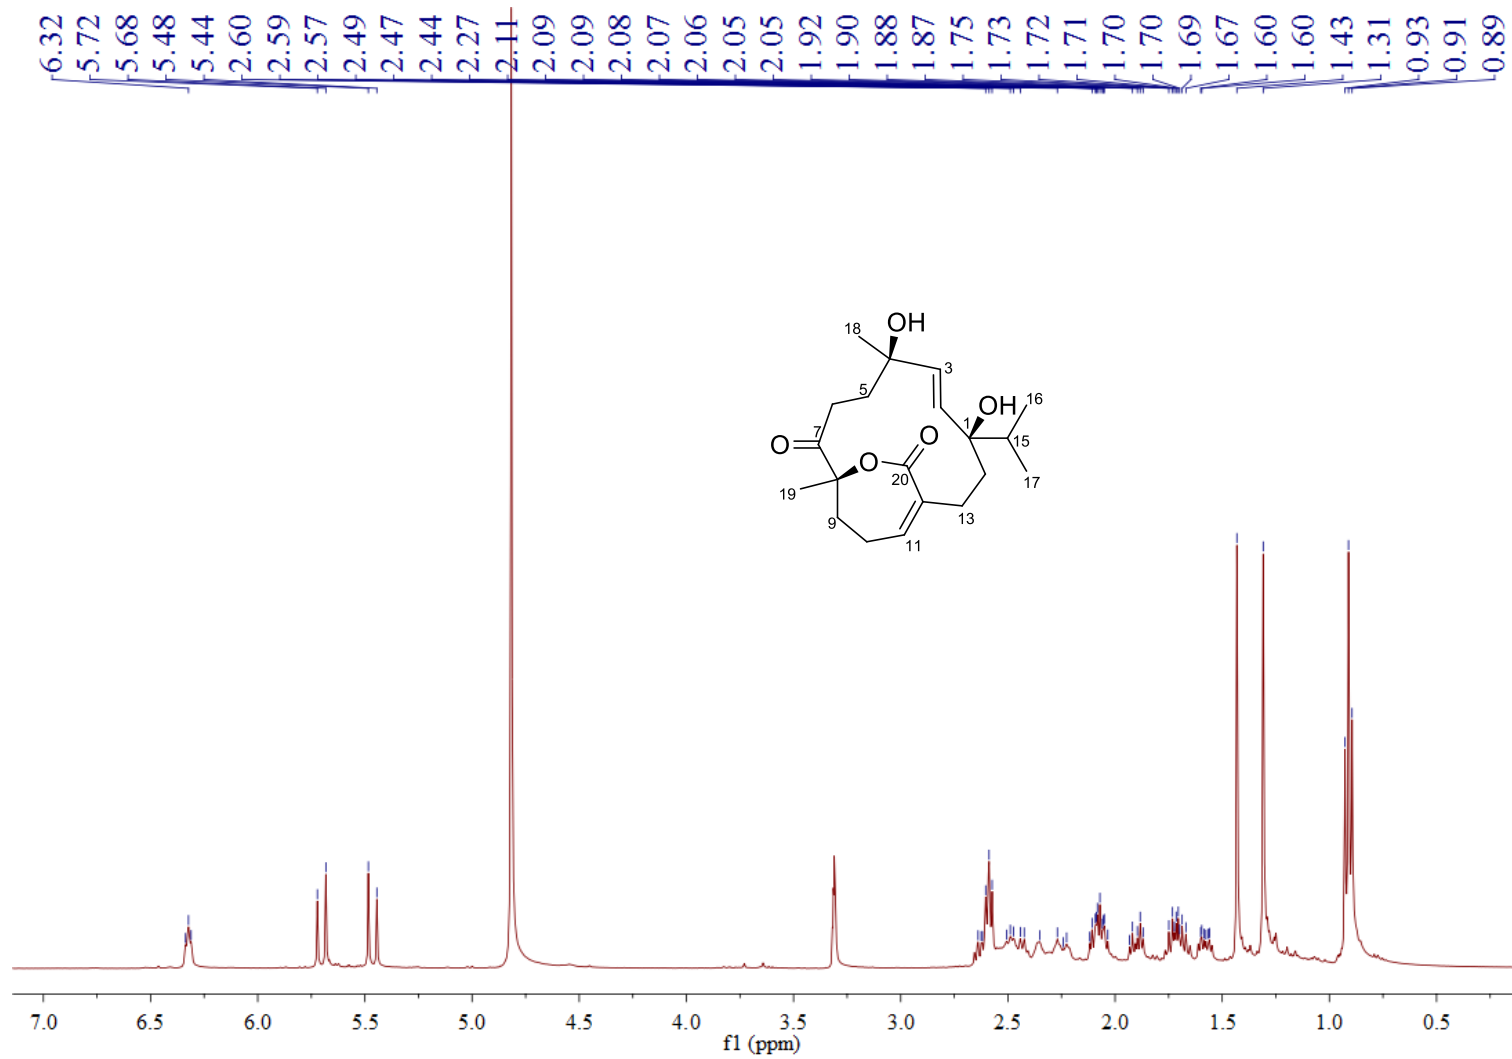

S51  $^{13}\text{C}$  NMR spectrum of **8** in Methanol- $d_4$

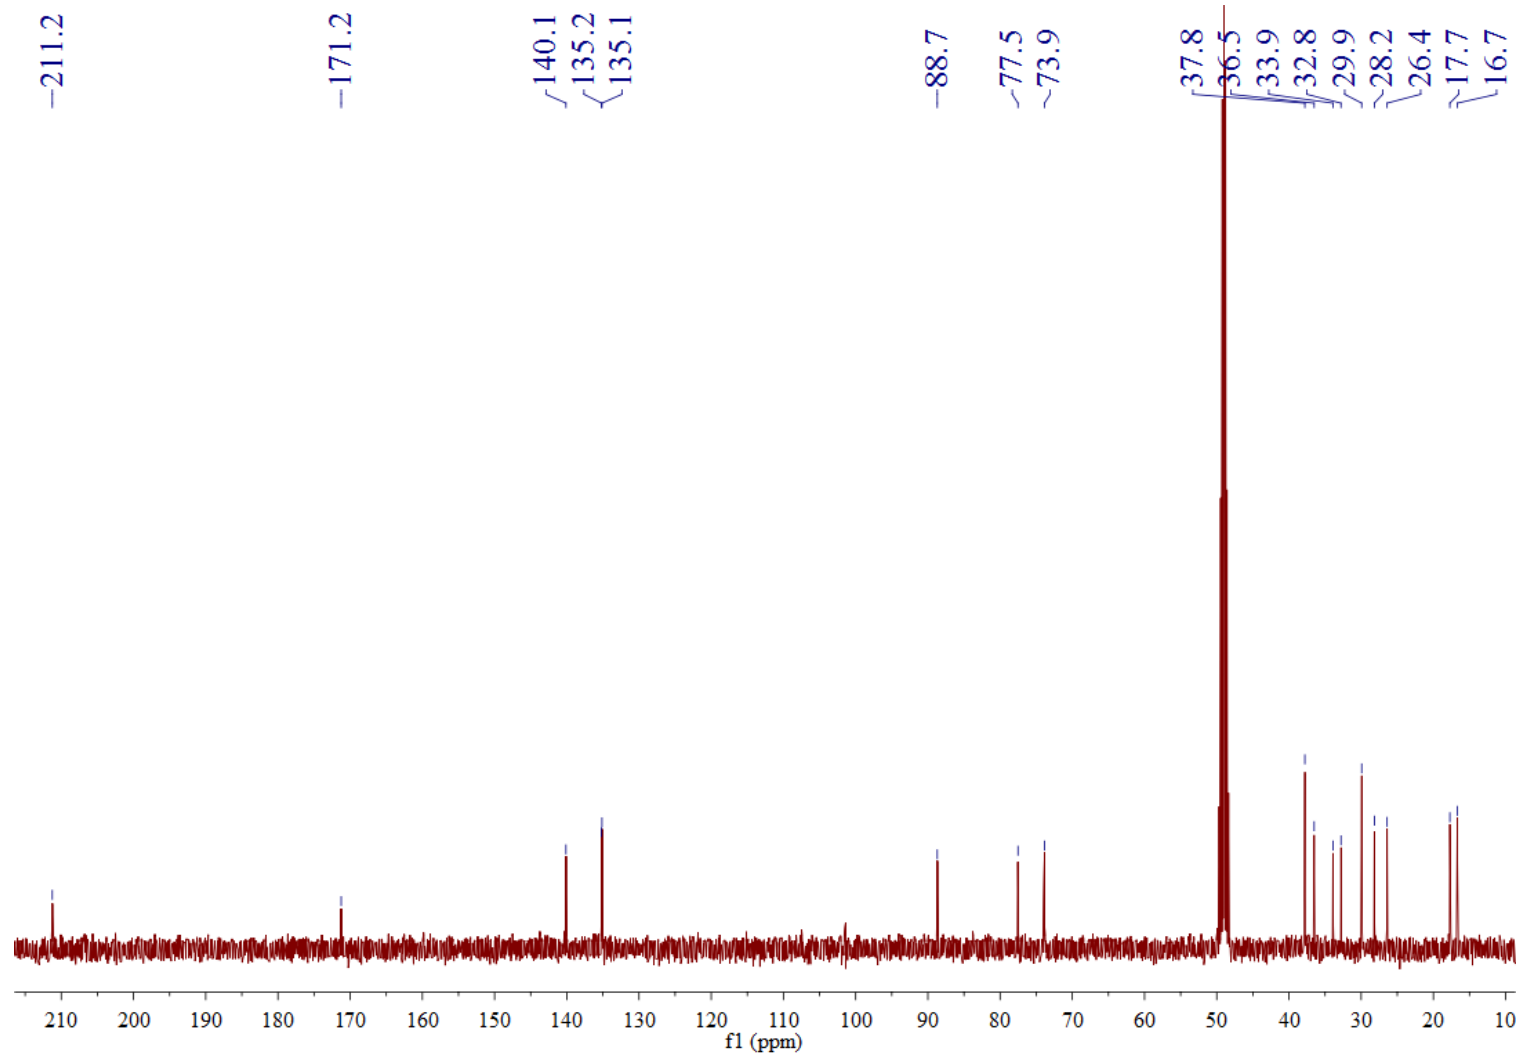

S52

$^1\text{H}$  NMR spectrum of **8** in  $\text{CDCl}_3$

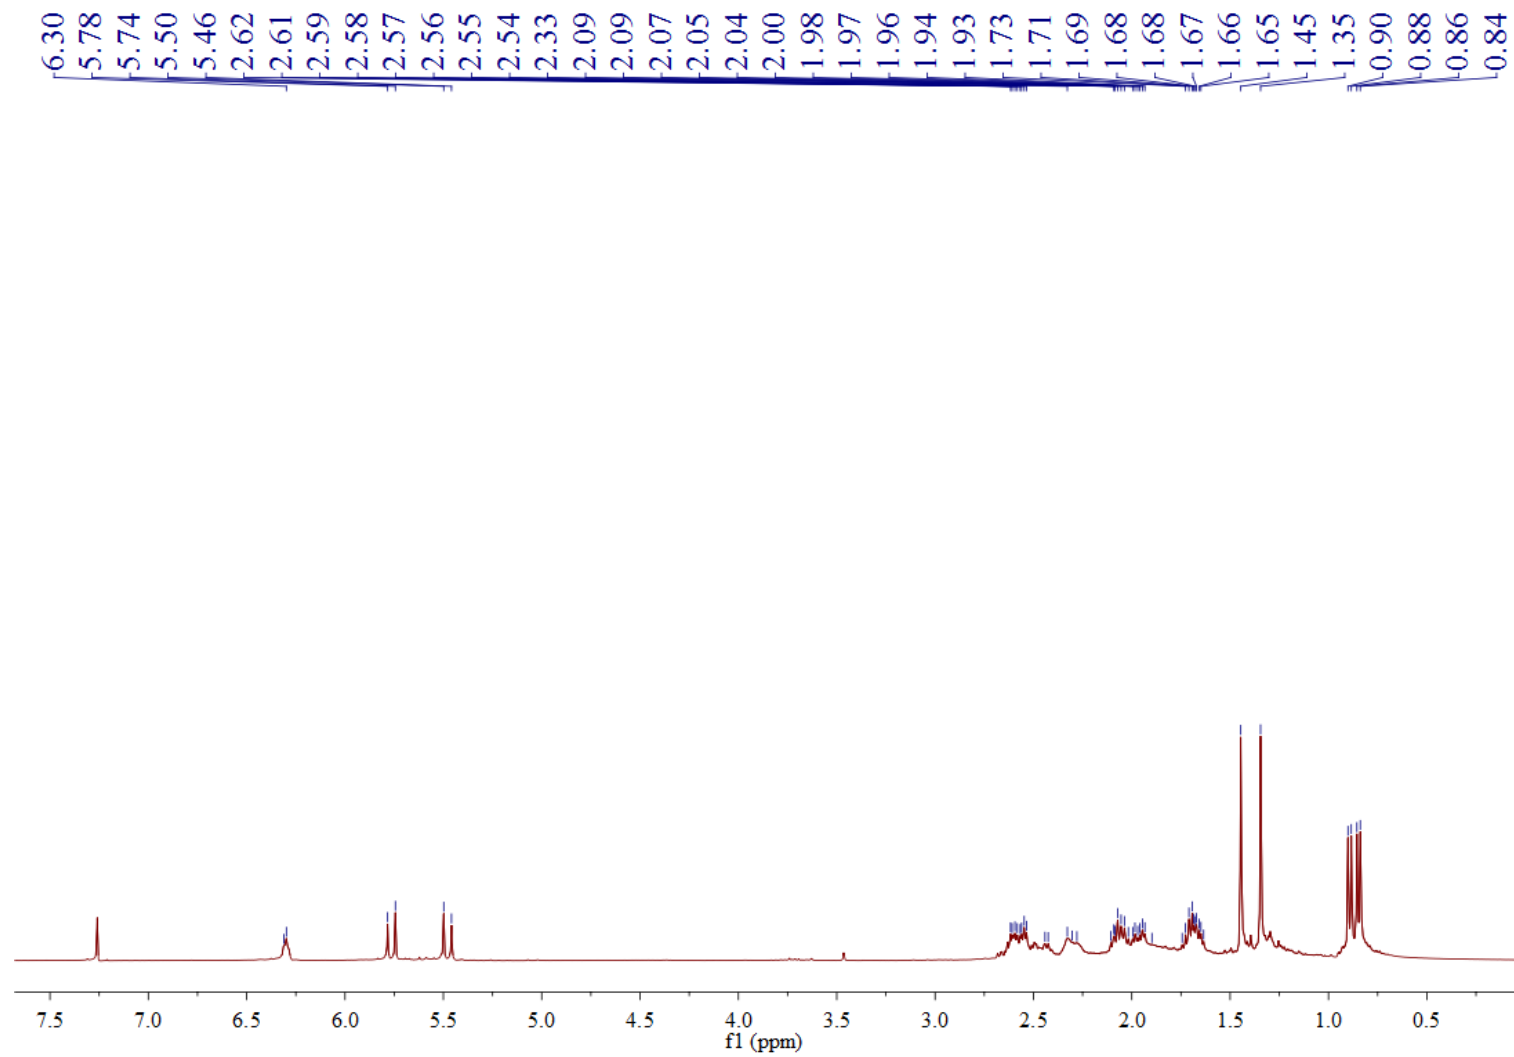



S53  $^{13}\text{C}$  NMR spectrum of **8** in  $\text{CDCl}_3$

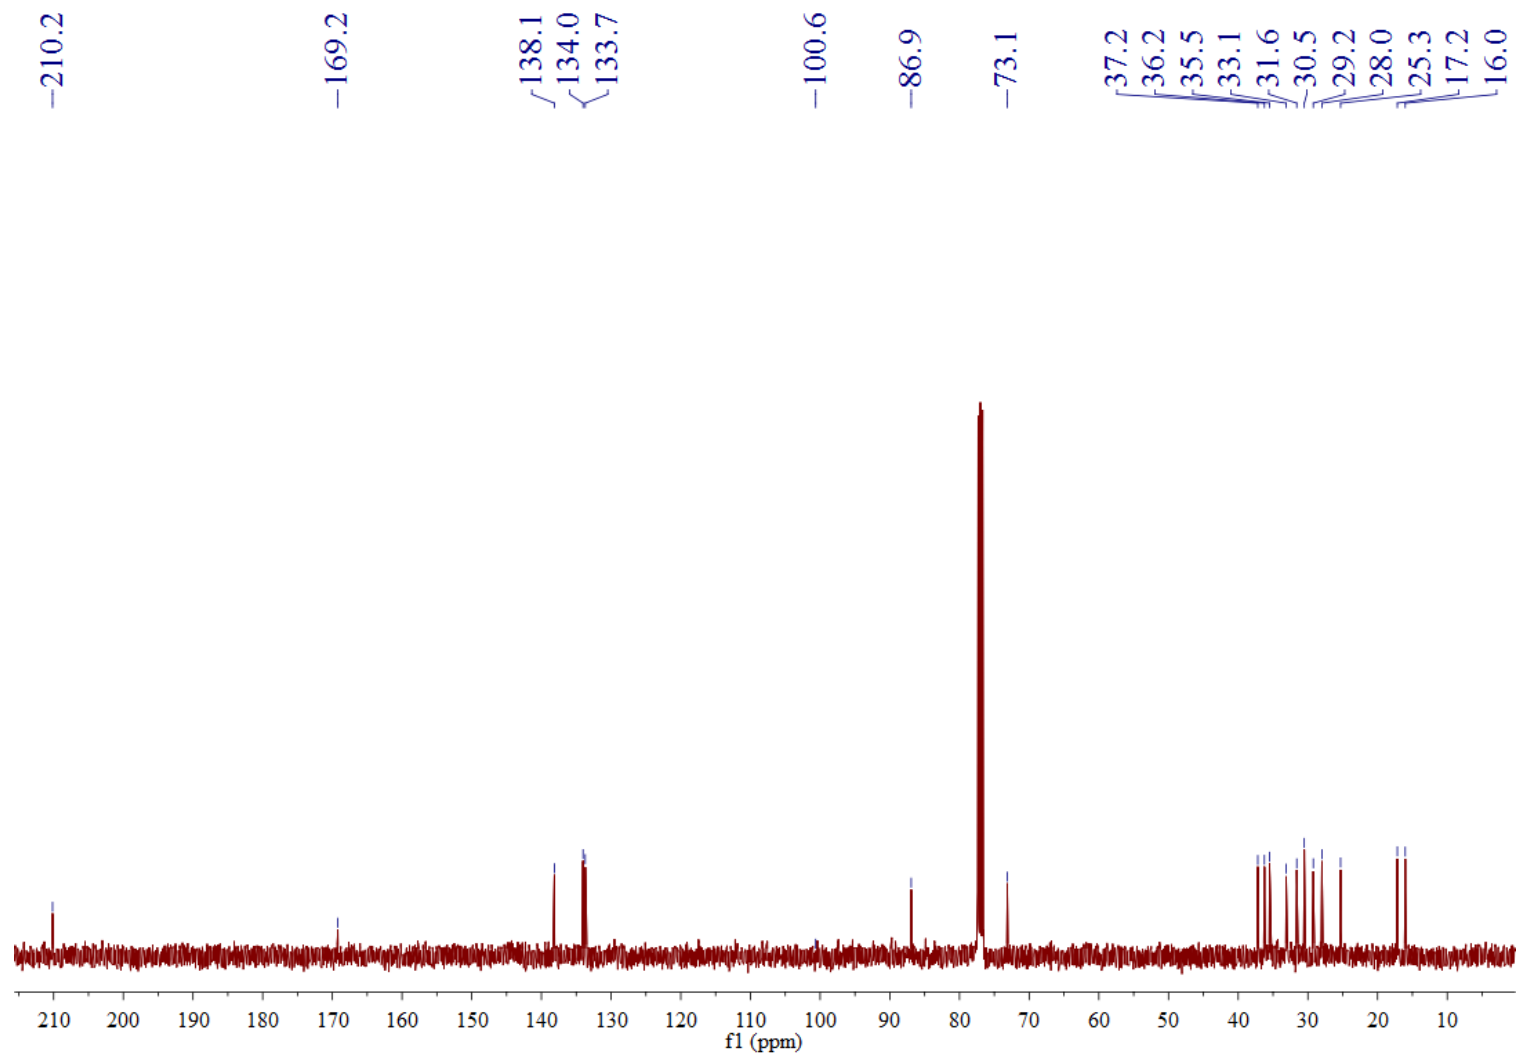

S54 <sup>1</sup>H NMR spectrum of **9** in Methanol-*d*<sub>4</sub>

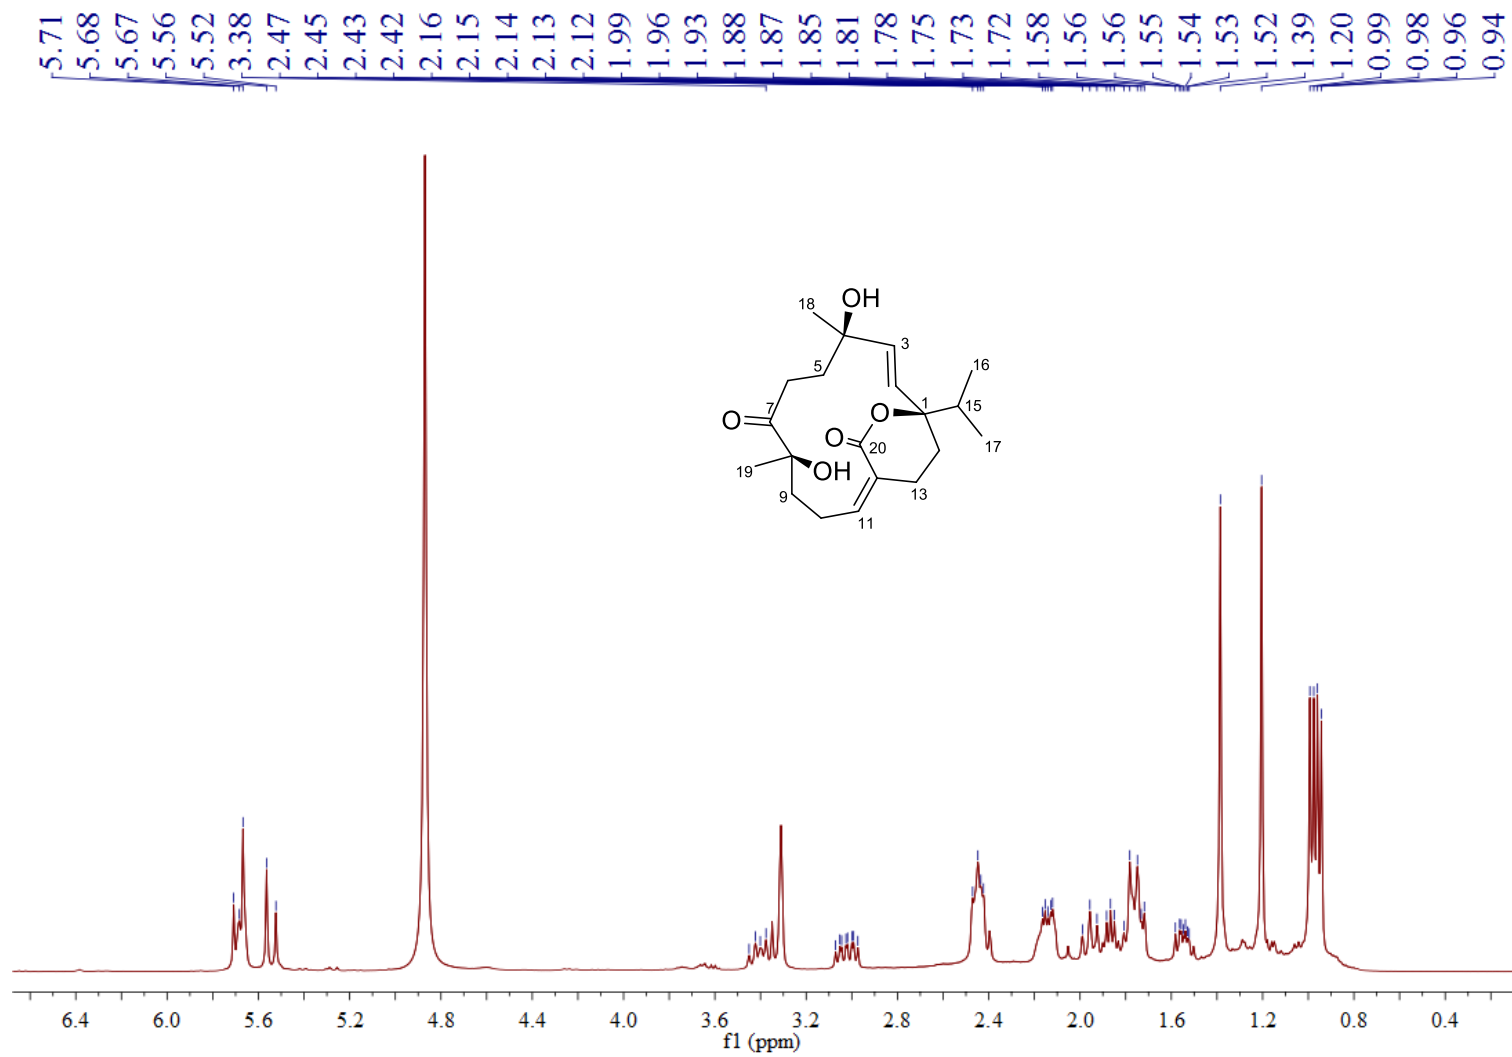

S55  $^{13}\text{C}$  NMR spectrum of **9** in Methanol- $d_4$

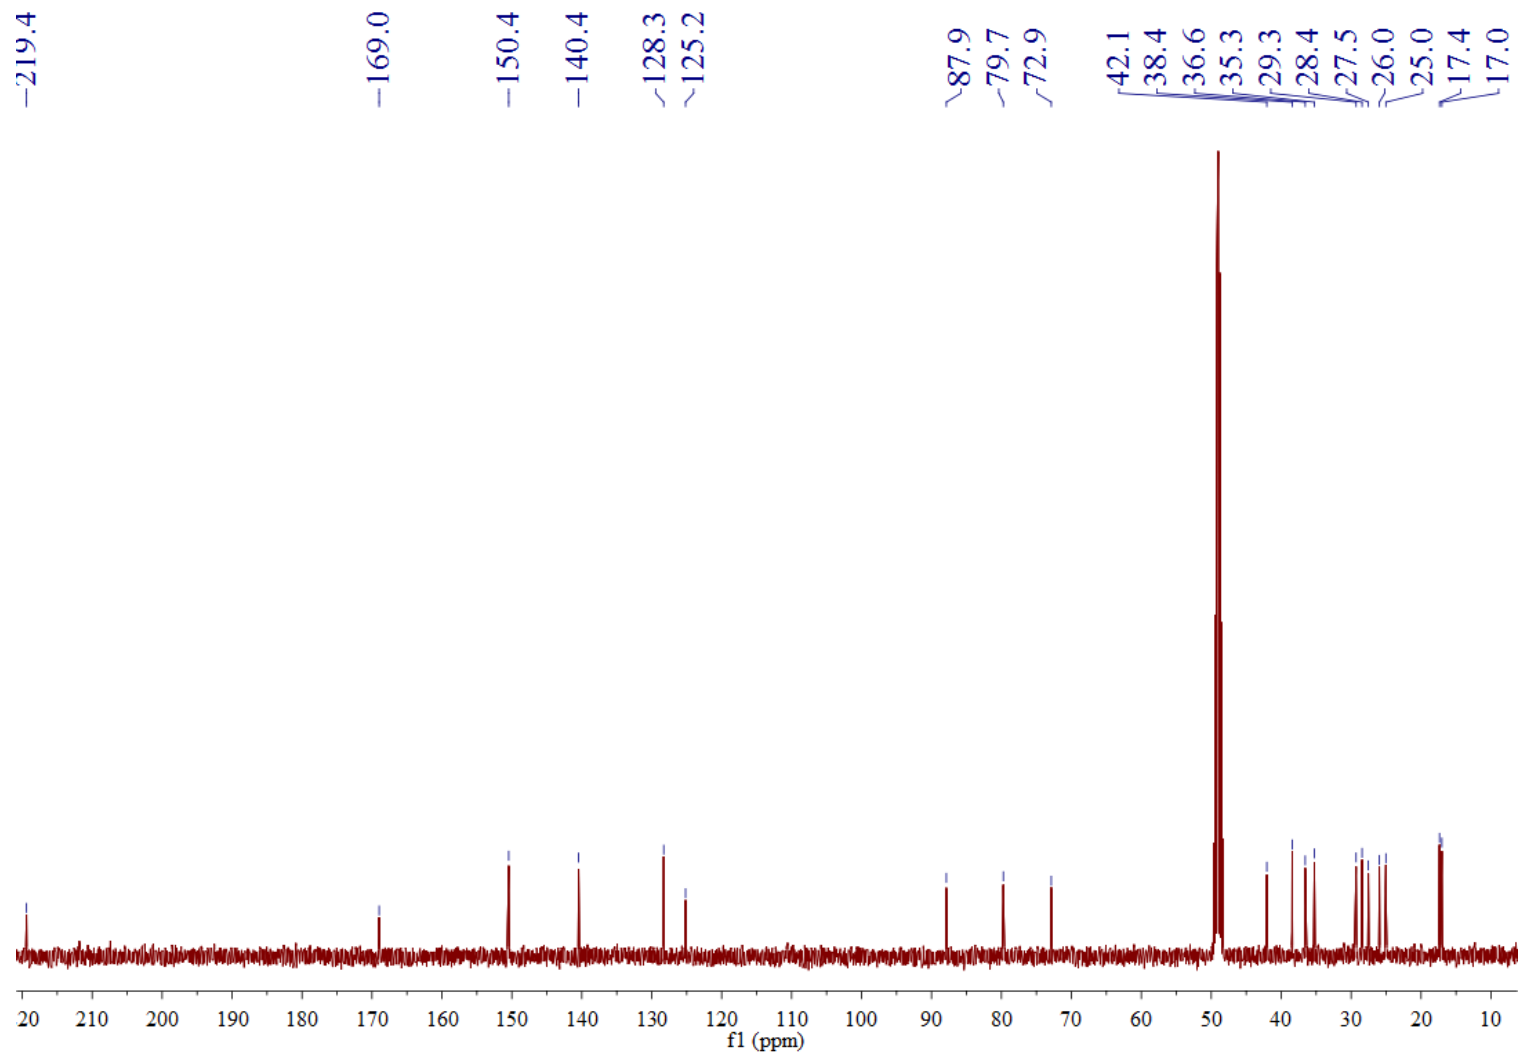

S56 Selected NOESY (↔) correlations of **2**.

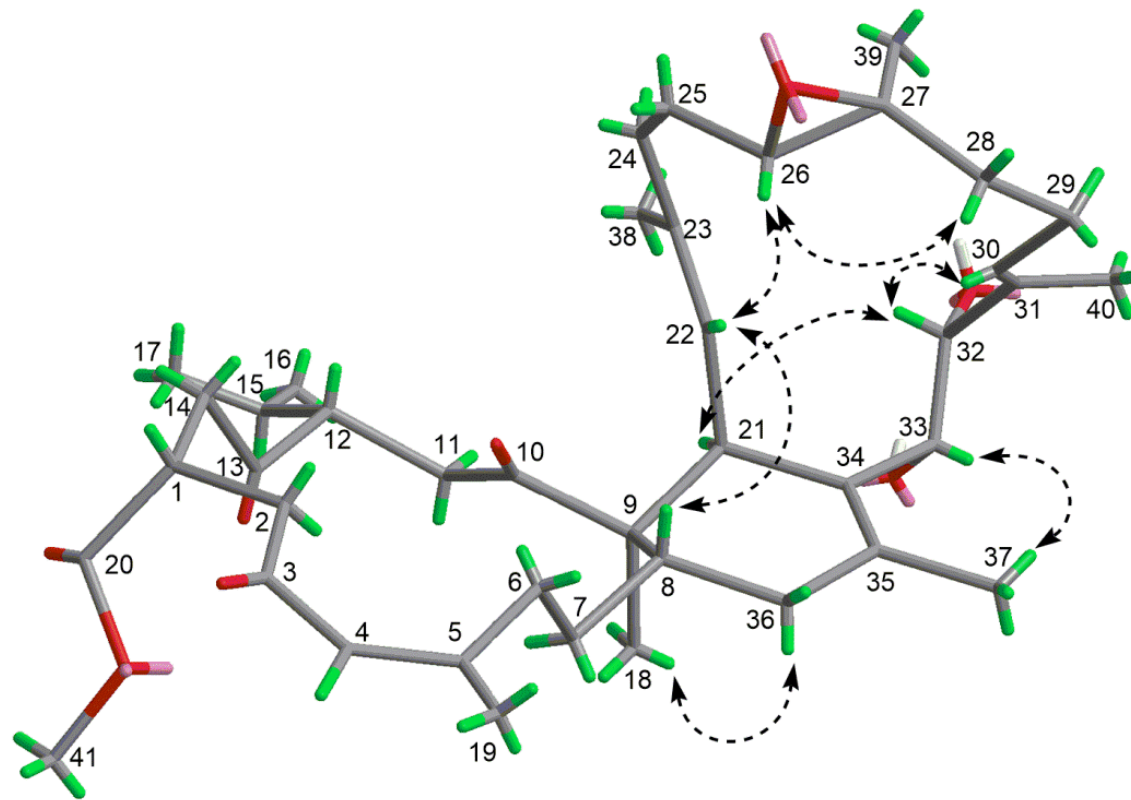

Supplement: marinedrugs-15-00085-s001.pdf [file marinedrugs-15-00085-s001.pdf]
